# Supplementary material
Source: publisher figshare collection journal article supplement (https://acs.figshare.com/ndownloader/files/9158689)
Supplement: Supplementary file 1 [file 9158689]

data_twin4_a
_audit_creation_date              2017-06-16
_audit_creation_method
;
Olex2 1.2
(compiled 2017.03.28 svn.r3405 for OlexSys, GUI svn.r5337)
;
_shelx_SHELXL_version_number      2014/7
_publ_contact_author_address      ?
_publ_contact_author_email        ?
_publ_contact_author_id_orcid     ?
_publ_contact_author_name         ''
_publ_contact_author_phone        ?
_publ_section_references
;
Burla, M.C., Caliandro, R., Camalli, M., Carrozzini, B., Cascarano, G.L.,
 De Caro, L., Giacovazzo, C., Polidori, G., Siliqi, D., Spagna, R.
 (2007). J. Appl. Cryst. 40, 609-613.

Dolomanov, O.V., Bourhis, L.J., Gildea, R.J, Howard, J.A.K. & Puschmann, H.
 (2009), J. Appl. Cryst. 42, 339-341.

Sheldrick, G.M. (2015). Acta Cryst. C71, 3-8.
;
_chemical_name_common             ?
_chemical_name_systematic
chlorotris(dimethylamido)-3-trifluoromethylpyridonatetantalum(V)
_chemical_formula_moiety          'C12 H21 Cl F3 N4 O Ta'
_chemical_formula_sum             'C12 H21 Cl F3 N4 O Ta'
_chemical_formula_weight          510.73
_chemical_melting_point           ?
loop_
  _atom_type_symbol
  _atom_type_description
  _atom_type_scat_dispersion_real
  _atom_type_scat_dispersion_imag
  _atom_type_scat_source
 C C 0.0033 0.0016 'International Tables Vol C Tables 4.2.6.8 and 6.1.1.4'
 H H 0.0000 0.0000 'International Tables Vol C Tables 4.2.6.8 and 6.1.1.4'
 Cl Cl 0.1484 0.1585 'International Tables Vol C Tables 4.2.6.8 and 6.1.1.4'
 F F 0.0171 0.0103 'International Tables Vol C Tables 4.2.6.8 and 6.1.1.4'
 N N 0.0061 0.0033 'International Tables Vol C Tables 4.2.6.8 and 6.1.1.4'
 O O 0.0106 0.0060 'International Tables Vol C Tables 4.2.6.8 and 6.1.1.4'
 Ta Ta -0.7052 6.5227 'International Tables Vol C Tables 4.2.6.8 and 6.1.1.4'

_shelx_space_group_comment
;
The symmetry employed for this shelxl refinement is uniquely defined
by the following loop, which should always be used as a source of
symmetry information in preference to the above space-group names.
They are only intended as comments.
;
_space_group_crystal_system       'triclinic'
_space_group_IT_number            2
_space_group_name_H-M_alt         'P -1'
_space_group_name_Hall            '-P 1'
loop_
  _space_group_symop_operation_xyz
 'x, y, z'
 '-x, -y, -z'

_cell_length_a                    7.9749(8)
_cell_length_b                    8.4683(6)
_cell_length_c                    14.7644(15)
_cell_angle_alpha                 86.868(3)
_cell_angle_beta                  86.448(2)
_cell_angle_gamma                 61.935(14)
_cell_volume                      877.79(17)
_cell_formula_units_Z             2
_cell_measurement_reflns_used     5294
_cell_measurement_temperature     100
_cell_measurement_theta_max       30.023
_cell_measurement_theta_min       2.727
_shelx_estimated_absorpt_T_max    0.661
_shelx_estimated_absorpt_T_min    0.425
_exptl_absorpt_coefficient_mu     6.447
_exptl_absorpt_correction_T_max   0.6439
_exptl_absorpt_correction_T_min   0.5300
_exptl_absorpt_correction_type    multi-scan
_exptl_absorpt_process_details
;
 TWINABS-2012/1 (Bruker,2012) was used for absorption correction.
 
For component 1:
 wR2(int) was 0.0543 before and 0.0303 after correction.
 The Ratio of minimum to maximum transmission is 0.78.
 The \l/2 correction factor is Not present
 
For component 2:
 wR2(int) was 0.0683 before and 0.0374 after correction.
 The Ratio of minimum to maximum transmission not present.
 The \l/2 correction factor is Not present

Final HKLF 4 output contains 23744 reflections, Rint = 0.0370
 (15114 with I > 3sig(I), Rint = 0.0320)
;
_exptl_absorpt_special_details    ?
_exptl_crystal_colour             'clear light yellow'
_exptl_crystal_colour_lustre      clear
_exptl_crystal_colour_modifier    light
_exptl_crystal_colour_primary     yellow
_exptl_crystal_density_diffrn     1.932
_exptl_crystal_density_meas       ?
_exptl_crystal_density_method     ?
_exptl_crystal_description        plate
_exptl_crystal_F_000              492
_exptl_crystal_size_max           0.16
_exptl_crystal_size_mid           0.12
_exptl_crystal_size_min           0.07
_exptl_transmission_factor_max    ?
_exptl_transmission_factor_min    ?
_diffrn_reflns_av_R_equivalents   0.0370
_diffrn_reflns_av_unetI/netI      0.0387
_diffrn_reflns_Laue_measured_fraction_full 1.000
_diffrn_reflns_Laue_measured_fraction_max 0.997
_diffrn_reflns_limit_h_max        11
_diffrn_reflns_limit_h_min        -11
_diffrn_reflns_limit_k_max        11
_diffrn_reflns_limit_k_min        -11
_diffrn_reflns_limit_l_max        0
_diffrn_reflns_limit_l_min        -20
_diffrn_reflns_number             5107
_diffrn_reflns_point_group_measured_fraction_full 1.000
_diffrn_reflns_point_group_measured_fraction_max 0.997
_diffrn_reflns_theta_full         26.000
_diffrn_reflns_theta_max          30.025
_diffrn_reflns_theta_min          1.382
_diffrn_ambient_temperature       100
_diffrn_detector_area_resol_mean  ?
_diffrn_measured_fraction_theta_full 1.000
_diffrn_measured_fraction_theta_max 0.997
_diffrn_measurement_device_type   'APEX2 DUO'
_diffrn_measurement_method        ?
_diffrn_radiation_type            MoK\a
_diffrn_radiation_wavelength      0.71073
_diffrn_source                    ?
_reflns_Friedel_coverage          0.000
_reflns_Friedel_fraction_full     .
_reflns_Friedel_fraction_max      .
_reflns_number_gt                 4562
_reflns_number_total              5107
_reflns_special_details
;
 _reflns_Friedel_fraction is defined as the number of unique
 Friedel pairs measured divided by the number that would be
 possible theoretically, ignoring centric projections and
 systematic absences.
;
_reflns_threshold_expression      'I > 2\s(I)'
_computing_cell_refinement        'SAINT v8.34A (Bruker, 2013)'
_computing_data_collection        ?
_computing_data_reduction         'SAINT v8.34A (Bruker, 2013)'
_computing_molecular_graphics     'Olex2 (Dolomanov et al., 2009)'
_computing_publication_material   'Olex2 (Dolomanov et al., 2009)'
_computing_structure_refinement   'ShelXL (Sheldrick, 2015)'
_computing_structure_solution     'SIR2004 (Burla et al., 2007)'
_refine_diff_density_max          1.386
_refine_diff_density_min          -1.252
_refine_diff_density_rms          0.168
_refine_ls_extinction_coef        .
_refine_ls_extinction_method      none
_refine_ls_goodness_of_fit_ref    1.069
_refine_ls_hydrogen_treatment     constr
_refine_ls_matrix_type            full
_refine_ls_number_parameters      273
_refine_ls_number_reflns          5107
_refine_ls_number_restraints      267
_refine_ls_R_factor_all           0.0377
_refine_ls_R_factor_gt            0.0292
_refine_ls_restrained_S_all       1.054
_refine_ls_shift/su_max           0.003
_refine_ls_shift/su_mean          0.000
_refine_ls_structure_factor_coef  Fsqd
_refine_ls_weighting_details
'w=1/[\s^2^(Fo^2^)+(0.0181P)^2^+2.4295P] where P=(Fo^2^+2Fc^2^)/3'
_refine_ls_weighting_scheme       calc
_refine_ls_wR_factor_gt           0.0551
_refine_ls_wR_factor_ref          0.0566
_refine_special_details           ?
_olex2_refinement_description
;
1. Others
 Fixed Sof: C11(0.6157) H11A(0.6157) H11B(0.6157) H11C(0.6157) C12(0.6157)
 H12A(0.6157) H12B(0.6157) H12C(0.6157) C10(0.6033) H10A(0.6033) H10B(0.6033)
 H10C(0.6033) F1A(0.4977) F2A(0.4977) F3A(0.4977) C12A(0.3843) H12D(0.3843)
 H12E(0.3843) H12F(0.3843) C11A(0.3843) H11D(0.3843) H11E(0.3843) H11F(0.3843)
 C8B(0.6497) H8BA(0.6497) H8BB(0.6497) H8BC(0.6497) C8C(0.3503) H8CA(0.3503)
 H8CB(0.3503) H8CC(0.3503) C10A(0.3967) H10D(0.3967) H10E(0.3967) H10F(0.3967)
 F3B(0.5023) F1B(0.5023) F2B(0.5023)
 Fixed Uiso: H5(0.028) H3(0.04) H4(0.039) H11A(0.062) H11B(0.062) H11C(0.062)
 H12A(0.063) H12B(0.063) H12C(0.063) H7A(0.056) H7B(0.056) H7C(0.056)
 H10A(0.064) H10B(0.064) H10C(0.064) H9AA(0.045) H9AB(0.045) H9AC(0.045)
 H12D(0.028) H12E(0.028) H12F(0.028) H11D(0.039) H11E(0.039) H11F(0.039)
 H8BA(0.043) H8BB(0.043) H8BC(0.043) H8CA(0.037) H8CB(0.037) H8CC(0.037)
 H10D(0.038) H10E(0.038) H10F(0.038)
 Fixed X: H5(-1.2714) H3(-1.2478) H4(-1.2779) H11A(-0.9407) H11B(-1.0772)
 H11C(-0.9627) H12A(-1.2713) H12B(-1.3711) H12C(-1.4399) H7A(-1.5803) H7B(-
 1.7445) H7C(-1.6819) H10A(-1.0539) H10B(-1.2098) H10C(-1.0412) H9AA(-1.4459)
 H9AB(-1.4619) H9AC(-1.2982) H12D(-1.1486) H12E(-1.3312) H12F(-1.3355) H11D(-
 1.066) H11E(-1.1357) H11F(-0.9442) H8BA(-1.6125) H8BB(-1.6784) H8BC(-1.4695)
 H8CA(-1.6576) H8CB(-1.7033) H8CC(-1.5193) H10D(-1.1085) H10E(-1.1112) H10F(-
 1.2985)
 Fixed Y: H5(0.3504) H3(0.7027) H4(0.4449) H11A(0.6915) H11B(0.8488)
 H11C(0.6479) H12A(0.7028) H12B(0.8932) H12C(0.747) H7A(0.5571) H7B(0.728)
 H7C(0.7456) H10A(0.1037) H10B(0.1344) H10C(0.1818) H9AA(0.4777) H9AB(0.3212)
 H9AC(0.2729) H12D(0.6267) H12E(0.8143) H12F(0.6309) H11D(0.8235) H11E(0.9023)
 H11F(0.7179) H8BA(0.986) H8BB(0.9899) H8BC(0.9628) H8CA(0.9841) H8CB(0.9215)
 H8CC(0.9503) H10D(0.2147) H10E(0.0982) H10F(0.2037)
 Fixed Z: H5(-0.5734) H3(-0.4095) H4(-0.4279) H11A(-0.8896) H11B(-0.9566)
 H11C(-0.991) H12A(-1.0384) H12B(-0.9915) H12C(-0.9635) H7A(-0.7353) H7B(-
 0.7847) H7C(-0.6864) H10A(-0.8328) H10B(-0.7526) H10C(-0.7387) H9AA(-0.9121)
 H9AB(-0.8526) H9AC(-0.9307) H12D(-1.0366) H12E(-1.0157) H12F(-0.9878) H11D(-
 0.8466) H11E(-0.9462) H11F(-0.934) H8BA(-0.7329) H8BB(-0.8335) H8BC(-0.8181)
 H8CA(-0.7611) H8CB(-0.8526) H8CC(-0.8494) H10D(-0.7093) H10E(-0.7904) H10F(-
 0.7272)
;
_atom_sites_solution_hydrogens    geom
_atom_sites_solution_primary      direct
_atom_sites_solution_secondary    ?
loop_
  _atom_site_label
  _atom_site_type_symbol
  _atom_site_fract_x
  _atom_site_fract_y
  _atom_site_fract_z
  _atom_site_U_iso_or_equiv
  _atom_site_adp_type
  _atom_site_occupancy
  _atom_site_site_symmetry_order
  _atom_site_calc_flag
  _atom_site_refinement_flags_posn
  _atom_site_refinement_flags_adp
  _atom_site_refinement_flags_occupancy
  _atom_site_disorder_assembly
  _atom_site_disorder_group
 Ta1 Ta -1.21758(2) 0.57641(2) -0.79409(2) 0.01217(4) Uani 1 1 d . U . . .
 Cl1 Cl -0.87146(12) 0.39421(12) -0.77412(6) 0.01909(17) Uani 1 1 d . U . . .
 O1 O -1.1882(4) 0.7587(3) -0.70804(18) 0.0182(5) Uani 1 1 d . U . . .
 N2 N -1.2468(5) 0.3647(4) -0.8180(2) 0.0205(7) Uani 1 1 d . U . . .
 N1 N -1.2326(4) 0.5427(4) -0.6390(2) 0.0165(6) Uani 1 1 d . U . . .
 N4 N -1.4954(5) 0.7330(4) -0.7869(2) 0.0208(7) Uani 1 1 d . U . . .
 N3 N -1.1857(5) 0.6905(4) -0.9079(2) 0.0214(7) Uani 1 1 d . U . . .
 C1 C -1.2131(5) 0.6908(5) -0.6302(3) 0.0185(7) Uani 1 1 d . U . . .
 C2 C -1.2230(5) 0.7573(6) -0.5435(3) 0.0257(8) Uani 1 1 d . U . . .
 C5 C -1.2573(5) 0.4541(6) -0.5656(3) 0.0232(8) Uani 1 1 d . U . . .
 H5 H -1.2714 0.3504 -0.5734 0.028 Uiso 1 1 calc R . . . .
 C3 C -1.2448(6) 0.6627(7) -0.4688(3) 0.0330(10) Uani 1 1 d . U . . .
 H3 H -1.2478 0.7027 -0.4095 0.040 Uiso 1 1 calc R . . . .
 C4 C -1.2625(6) 0.5100(7) -0.4793(3) 0.0324(10) Uani 1 1 d . U . . .
 H4 H -1.2779 0.4449 -0.4279 0.039 Uiso 1 1 calc R . . . .
 C11 C -1.0291(14) 0.7222(15) -0.9387(7) 0.042(2) Uani 0.6157 1 d . U P A 1
 H11A H -0.9407 0.6915 -0.8896 0.062 Uiso 0.6157 1 calc GR . P A 1
 H11B H -1.0772 0.8488 -0.9566 0.062 Uiso 0.6157 1 calc GR . P A 1
 H11C H -0.9627 0.6479 -0.9910 0.062 Uiso 0.6157 1 calc GR . P A 1
 C12 C -1.3298(14) 0.7650(15) -0.9819(6) 0.042(2) Uani 0.6157 1 d . U P A 1
 H12A H -1.2713 0.7028 -1.0384 0.063 Uiso 0.6157 1 calc GR . P A 1
 H12B H -1.3711 0.8932 -0.9915 0.063 Uiso 0.6157 1 calc GR . P A 1
 H12C H -1.4399 0.7470 -0.9635 0.063 Uiso 0.6157 1 calc GR . P A 1
 C7 C -1.6371(6) 0.6872(7) -0.7449(4) 0.0371(11) Uani 1 1 d . U . . .
 H7A H -1.5803 0.5571 -0.7353 0.056 Uiso 1 1 calc GR . . . .
 H7B H -1.7445 0.7280 -0.7847 0.056 Uiso 1 1 calc GR . . . .
 H7C H -1.6819 0.7456 -0.6864 0.056 Uiso 1 1 calc GR . . . .
 C10 C -1.1279(18) 0.1807(16) -0.7825(10) 0.042(3) Uani 0.6033 1 d . U P B 1
 H10A H -1.0539 0.1037 -0.8328 0.064 Uiso 0.6033 1 calc GR . P B 1
 H10B H -1.2098 0.1344 -0.7526 0.064 Uiso 0.6033 1 calc GR . P B 1
 H10C H -1.0412 0.1818 -0.7387 0.064 Uiso 0.6033 1 calc GR . P B 1
 C9A C -1.3737(6) 0.3586(6) -0.8838(3) 0.0300(9) Uani 1 1 d . U . . .
 H9AA H -1.4459 0.4777 -0.9121 0.045 Uiso 1 1 calc GR . . . .
 H9AB H -1.4619 0.3212 -0.8526 0.045 Uiso 1 1 calc GR . . . .
 H9AC H -1.2982 0.2729 -0.9307 0.045 Uiso 1 1 calc GR . . . .
 F1A F -1.3582(17) 1.0717(16) -0.5960(7) 0.038(2) Uani 0.4977 1 d . U P C 1
 C6A C -1.2101(7) 0.9253(8) -0.5366(4) 0.0390(11) Uani 1 1 d . U . . .
 F2A F -1.033(2) 0.893(2) -0.5676(15) 0.028(2) Uani 0.4977 1 d . U P C 1
 F3A F -1.2517(12) 1.0093(11) -0.4603(6) 0.042(2) Uani 0.4977 1 d . U P C 1
 C12A C -1.2556(16) 0.6906(16) -0.9936(7) 0.019(2) Uani 0.3843 1 d . U P A 2
 H12D H -1.1486 0.6267 -1.0366 0.028 Uiso 0.3843 1 calc GR . P A 2
 H12E H -1.3312 0.8143 -1.0157 0.028 Uiso 0.3843 1 calc GR . P A 2
 H12F H -1.3355 0.6309 -0.9878 0.028 Uiso 0.3843 1 calc GR . P A 2
 C11A C -1.073(2) 0.7925(19) -0.9087(9) 0.026(3) Uani 0.3843 1 d . U P A 2
 H11D H -1.0660 0.8235 -0.8466 0.039 Uiso 0.3843 1 calc GR . P A 2
 H11E H -1.1357 0.9023 -0.9462 0.039 Uiso 0.3843 1 calc GR . P A 2
 H11F H -0.9442 0.7179 -0.9340 0.039 Uiso 0.3843 1 calc GR . P A 2
 C8B C -1.5707(16) 0.9362(12) -0.7934(8) 0.028(2) Uani 0.6497 1 d . U P D 1
 H8BA H -1.6125 0.9860 -0.7329 0.043 Uiso 0.6497 1 calc GR . P D 1
 H8BB H -1.6784 0.9899 -0.8335 0.043 Uiso 0.6497 1 calc GR . P D 1
 H8BC H -1.4695 0.9628 -0.8181 0.043 Uiso 0.6497 1 calc GR . P D 1
 C8C C -1.602(3) 0.910(2) -0.8145(14) 0.025(4) Uani 0.3503 1 d . U P D 2
 H8CA H -1.6576 0.9841 -0.7611 0.037 Uiso 0.3503 1 calc GR . P D 2
 H8CB H -1.7033 0.9215 -0.8526 0.037 Uiso 0.3503 1 calc GR . P D 2
 H8CC H -1.5193 0.9503 -0.8494 0.037 Uiso 0.3503 1 calc GR . P D 2
 C10A C -1.186(2) 0.207(2) -0.7561(12) 0.026(3) Uani 0.3967 1 d . U P B 2
 H10D H -1.1085 0.2147 -0.7093 0.038 Uiso 0.3967 1 calc GR . P B 2
 H10E H -1.1112 0.0982 -0.7904 0.038 Uiso 0.3967 1 calc GR . P B 2
 H10F H -1.2985 0.2037 -0.7272 0.038 Uiso 0.3967 1 calc GR . P B 2
 F3B F -1.1929(13) 0.9336(11) -0.4405(6) 0.0400(19) Uani 0.5023 1 d . U P C 2
 F1B F -1.3403(18) 1.0571(16) -0.5642(6) 0.036(2) Uani 0.5023 1 d . U P C 2
 F2B F -1.062(2) 0.940(2) -0.5794(15) 0.032(3) Uani 0.5023 1 d . U P C 2

loop_
  _atom_site_aniso_label
  _atom_site_aniso_U_11
  _atom_site_aniso_U_22
  _atom_site_aniso_U_33
  _atom_site_aniso_U_23
  _atom_site_aniso_U_13
  _atom_site_aniso_U_12
 Ta1 0.01353(7) 0.01346(7) 0.00934(7) 0.00153(4) -0.00221(4) -0.00618(5)
 Cl1 0.0146(4) 0.0206(4) 0.0200(4) 0.0008(3) -0.0025(3) -0.0065(3)
 O1 0.0229(13) 0.0172(12) 0.0168(13) -0.0019(10) 0.0021(10) -0.0115(11)
 N2 0.0202(15) 0.0205(15) 0.0255(17) 0.0018(12) -0.0089(13) -0.0128(13)
 N1 0.0168(14) 0.0208(15) 0.0126(14) 0.0018(11) -0.0028(11) -0.0093(12)
 N4 0.0175(14) 0.0223(16) 0.0149(15) 0.0056(12) -0.0015(12) -0.0036(13)
 N3 0.0232(16) 0.0174(15) 0.0192(16) 0.0033(12) 0.0013(12) -0.0067(13)
 C1 0.0142(16) 0.0236(18) 0.0189(17) -0.0067(13) 0.0024(13) -0.0097(14)
 C2 0.0149(17) 0.041(2) 0.0234(19) -0.0167(16) 0.0033(14) -0.0138(17)
 C5 0.0148(17) 0.030(2) 0.0208(19) 0.0082(15) -0.0012(14) -0.0083(16)
 C3 0.0148(18) 0.062(3) 0.0170(19) -0.0079(18) -0.0020(15) -0.0126(19)
 C4 0.0186(19) 0.051(3) 0.019(2) 0.0065(17) -0.0009(15) -0.0098(19)
 C11 0.037(4) 0.053(7) 0.034(5) 0.013(4) 0.002(4) -0.023(5)
 C12 0.041(5) 0.051(6) 0.022(4) 0.010(4) -0.007(4) -0.012(4)
 C7 0.020(2) 0.040(3) 0.050(3) -0.008(2) 0.011(2) -0.014(2)
 C10 0.038(6) 0.028(5) 0.072(9) 0.019(5) -0.024(6) -0.024(4)
 C9A 0.032(2) 0.034(2) 0.027(2) -0.0093(17) -0.0054(17) -0.0159(19)
 F1A 0.028(3) 0.029(3) 0.055(6) -0.024(4) -0.003(4) -0.009(3)
 C6A 0.030(2) 0.050(3) 0.046(3) -0.034(2) 0.0159(19) -0.025(2)
 F2A 0.022(4) 0.034(7) 0.032(5) -0.009(5) 0.001(3) -0.017(4)
 F3A 0.034(4) 0.049(5) 0.046(4) -0.035(4) 0.008(3) -0.020(4)
 C12A 0.018(5) 0.019(6) 0.009(4) 0.007(3) 0.003(3) -0.002(4)
 C11A 0.036(7) 0.031(7) 0.016(6) 0.000(4) 0.009(4) -0.022(6)
 C8B 0.025(5) 0.020(3) 0.033(6) 0.008(3) -0.001(4) -0.005(3)
 C8C 0.016(6) 0.025(5) 0.031(10) 0.005(5) 0.001(5) -0.008(4)
 C10A 0.035(9) 0.014(5) 0.033(6) 0.003(4) -0.007(6) -0.015(5)
 F3B 0.056(6) 0.046(5) 0.034(3) -0.025(3) 0.013(3) -0.037(4)
 F1B 0.040(4) 0.032(3) 0.047(5) -0.025(3) 0.014(4) -0.024(3)
 F2B 0.024(4) 0.036(7) 0.037(6) -0.015(5) 0.003(4) -0.016(5)

_geom_special_details
;
 All esds (except the esd in the dihedral angle between two l.s. planes)
 are estimated using the full covariance matrix.  The cell esds are taken
 into account individually in the estimation of esds in distances, angles
 and torsion angles; correlations between esds in cell parameters are only
 used when they are defined by crystal symmetry.  An approximate (isotropic)
 treatment of cell esds is used for estimating esds involving l.s. planes.
;
loop_
  _geom_bond_atom_site_label_1
  _geom_bond_atom_site_label_2
  _geom_bond_distance
  _geom_bond_site_symmetry_2
  _geom_bond_publ_flag
 Ta1 Cl1 2.4760(10) . ?
 Ta1 O1 2.155(3) . ?
 Ta1 N2 1.967(3) . ?
 Ta1 N1 2.295(3) . ?
 Ta1 N4 1.975(3) . ?
 Ta1 N3 1.955(3) . ?
 Ta1 C1 2.663(4) . ?
 O1 C1 1.303(5) . ?
 N2 C10 1.478(12) . ?
 N2 C9A 1.465(5) . ?
 N2 C10A 1.471(17) . ?
 N1 C1 1.349(5) . ?
 N1 C5 1.342(5) . ?
 N4 C7 1.453(5) . ?
 N4 C8B 1.532(10) . ?
 N4 C8C 1.384(19) . ?
 N3 C11 1.439(9) . ?
 N3 C12 1.520(9) . ?
 N3 C12A 1.413(12) . ?
 N3 C11A 1.511(13) . ?
 C1 C2 1.410(5) . ?
 C2 C3 1.379(7) . ?
 C2 C6A 1.483(7) . ?
 C5 H5 0.9500 . ?
 C5 C4 1.374(6) . ?
 C3 H3 0.9500 . ?
 C3 C4 1.382(7) . ?
 C4 H4 0.9500 . ?
 C11 H11A 0.9800 . ?
 C11 H11B 0.9800 . ?
 C11 H11C 0.9800 . ?
 C12 H12A 0.9800 . ?
 C12 H12B 0.9800 . ?
 C12 H12C 0.9800 . ?
 C7 H7A 0.9800 . ?
 C7 H7B 0.9800 . ?
 C7 H7C 0.9800 . ?
 C10 H10A 0.9800 . ?
 C10 H10B 0.9800 . ?
 C10 H10C 0.9800 . ?
 C9A H9AA 0.9800 . ?
 C9A H9AB 0.9800 . ?
 C9A H9AC 0.9800 . ?
 F1A C6A 1.527(12) . ?
 C6A F2A 1.360(16) . ?
 C6A F3A 1.306(9) . ?
 C6A F3B 1.443(10) . ?
 C6A F1B 1.184(13) . ?
 C6A F2B 1.358(17) . ?
 C12A H12D 0.9800 . ?
 C12A H12E 0.9800 . ?
 C12A H12F 0.9800 . ?
 C11A H11D 0.9800 . ?
 C11A H11E 0.9800 . ?
 C11A H11F 0.9800 . ?
 C8B H8BA 0.9800 . ?
 C8B H8BB 0.9800 . ?
 C8B H8BC 0.9800 . ?
 C8C H8CA 0.9800 . ?
 C8C H8CB 0.9800 . ?
 C8C H8CC 0.9800 . ?
 C10A H10D 0.9800 . ?
 C10A H10E 0.9800 . ?
 C10A H10F 0.9800 . ?

loop_
  _geom_angle_atom_site_label_1
  _geom_angle_atom_site_label_2
  _geom_angle_atom_site_label_3
  _geom_angle
  _geom_angle_site_symmetry_1
  _geom_angle_site_symmetry_3
  _geom_angle_publ_flag
 Cl1 Ta1 C1 83.24(8) . . ?
 O1 Ta1 Cl1 83.40(7) . . ?
 O1 Ta1 N1 59.37(10) . . ?
 O1 Ta1 C1 28.99(11) . . ?
 N2 Ta1 Cl1 92.40(10) . . ?
 N2 Ta1 O1 154.24(13) . . ?
 N2 Ta1 N1 94.92(13) . . ?
 N2 Ta1 N4 92.43(14) . . ?
 N2 Ta1 C1 125.34(13) . . ?
 N1 Ta1 Cl1 83.00(8) . . ?
 N1 Ta1 C1 30.42(11) . . ?
 N4 Ta1 Cl1 169.62(10) . . ?
 N4 Ta1 O1 88.27(12) . . ?
 N4 Ta1 N1 87.44(12) . . ?
 N4 Ta1 C1 86.46(13) . . ?
 N3 Ta1 Cl1 94.02(10) . . ?
 N3 Ta1 O1 95.07(12) . . ?
 N3 Ta1 N2 110.60(14) . . ?
 N3 Ta1 N1 154.43(13) . . ?
 N3 Ta1 N4 92.88(13) . . ?
 N3 Ta1 C1 124.05(13) . . ?
 C1 O1 Ta1 97.7(2) . . ?
 C10 N2 Ta1 126.0(6) . . ?
 C9A N2 Ta1 125.3(3) . . ?
 C9A N2 C10 108.3(7) . . ?
 C9A N2 C10A 109.1(9) . . ?
 C10A N2 Ta1 123.7(8) . . ?
 C1 N1 Ta1 90.1(2) . . ?
 C5 N1 Ta1 149.1(3) . . ?
 C5 N1 C1 120.7(3) . . ?
 C7 N4 Ta1 126.4(3) . . ?
 C7 N4 C8B 111.3(5) . . ?
 C8B N4 Ta1 118.6(5) . . ?
 C8C N4 Ta1 130.1(9) . . ?
 C8C N4 C7 103.4(9) . . ?
 C11 N3 Ta1 128.6(5) . . ?
 C11 N3 C12 106.7(6) . . ?
 C12 N3 Ta1 124.7(5) . . ?
 C12A N3 Ta1 128.0(6) . . ?
 C12A N3 C11A 113.2(8) . . ?
 C11A N3 Ta1 118.8(6) . . ?
 O1 C1 Ta1 53.29(18) . . ?
 O1 C1 N1 112.7(3) . . ?
 O1 C1 C2 127.0(4) . . ?
 N1 C1 Ta1 59.50(19) . . ?
 N1 C1 C2 120.3(4) . . ?
 C2 C1 Ta1 176.5(3) . . ?
 C1 C2 C6A 118.8(4) . . ?
 C3 C2 C1 118.2(4) . . ?
 C3 C2 C6A 123.1(4) . . ?
 N1 C5 H5 119.3 . . ?
 N1 C5 C4 121.4(4) . . ?
 C4 C5 H5 119.3 . . ?
 C2 C3 H3 119.7 . . ?
 C2 C3 C4 120.6(4) . . ?
 C4 C3 H3 119.7 . . ?
 C5 C4 C3 118.8(4) . . ?
 C5 C4 H4 120.6 . . ?
 C3 C4 H4 120.6 . . ?
 N3 C11 H11A 109.5 . . ?
 N3 C11 H11B 109.5 . . ?
 N3 C11 H11C 109.5 . . ?
 H11A C11 H11B 109.5 . . ?
 H11A C11 H11C 109.5 . . ?
 H11B C11 H11C 109.5 . . ?
 N3 C12 H12A 109.5 . . ?
 N3 C12 H12B 109.5 . . ?
 N3 C12 H12C 109.5 . . ?
 H12A C12 H12B 109.5 . . ?
 H12A C12 H12C 109.5 . . ?
 H12B C12 H12C 109.5 . . ?
 N4 C7 H7A 109.5 . . ?
 N4 C7 H7B 109.5 . . ?
 N4 C7 H7C 109.5 . . ?
 H7A C7 H7B 109.5 . . ?
 H7A C7 H7C 109.5 . . ?
 H7B C7 H7C 109.5 . . ?
 N2 C10 H10A 109.5 . . ?
 N2 C10 H10B 109.5 . . ?
 N2 C10 H10C 109.5 . . ?
 H10A C10 H10B 109.5 . . ?
 H10A C10 H10C 109.5 . . ?
 H10B C10 H10C 109.5 . . ?
 N2 C9A H9AA 109.5 . . ?
 N2 C9A H9AB 109.5 . . ?
 N2 C9A H9AC 109.5 . . ?
 H9AA C9A H9AB 109.5 . . ?
 H9AA C9A H9AC 109.5 . . ?
 H9AB C9A H9AC 109.5 . . ?
 C2 C6A F1A 109.3(6) . . ?
 F2A C6A C2 107.8(9) . . ?
 F2A C6A F1A 109.4(9) . . ?
 F3A C6A C2 121.1(6) . . ?
 F3A C6A F1A 99.4(7) . . ?
 F3A C6A F2A 109.3(12) . . ?
 F3B C6A C2 102.8(5) . . ?
 F1B C6A C2 115.8(7) . . ?
 F1B C6A F3B 111.0(7) . . ?
 F1B C6A F2B 100.7(10) . . ?
 F2B C6A C2 119.4(9) . . ?
 F2B C6A F3B 107.0(11) . . ?
 N3 C12A H12D 109.5 . . ?
 N3 C12A H12E 109.5 . . ?
 N3 C12A H12F 109.5 . . ?
 H12D C12A H12E 109.5 . . ?
 H12D C12A H12F 109.5 . . ?
 H12E C12A H12F 109.5 . . ?
 N3 C11A H11D 109.5 . . ?
 N3 C11A H11E 109.5 . . ?
 N3 C11A H11F 109.5 . . ?
 H11D C11A H11E 109.5 . . ?
 H11D C11A H11F 109.5 . . ?
 H11E C11A H11F 109.5 . . ?
 N4 C8B H8BA 109.5 . . ?
 N4 C8B H8BB 109.5 . . ?
 N4 C8B H8BC 109.5 . . ?
 H8BA C8B H8BB 109.5 . . ?
 H8BA C8B H8BC 109.5 . . ?
 H8BB C8B H8BC 109.5 . . ?
 N4 C8C H8CA 109.5 . . ?
 N4 C8C H8CB 109.5 . . ?
 N4 C8C H8CC 109.5 . . ?
 H8CA C8C H8CB 109.5 . . ?
 H8CA C8C H8CC 109.5 . . ?
 H8CB C8C H8CC 109.5 . . ?
 N2 C10A H10D 109.5 . . ?
 N2 C10A H10E 109.5 . . ?
 N2 C10A H10F 109.5 . . ?
 H10D C10A H10E 109.5 . . ?
 H10D C10A H10F 109.5 . . ?
 H10E C10A H10F 109.5 . . ?

loop_
  _geom_torsion_atom_site_label_1
  _geom_torsion_atom_site_label_2
  _geom_torsion_atom_site_label_3
  _geom_torsion_atom_site_label_4
  _geom_torsion
  _geom_torsion_site_symmetry_1
  _geom_torsion_site_symmetry_2
  _geom_torsion_site_symmetry_3
  _geom_torsion_site_symmetry_4
  _geom_torsion_publ_flag
 Ta1 O1 C1 N1 3.5(3) . . . . ?
 Ta1 O1 C1 C2 -175.6(3) . . . . ?
 Ta1 N1 C1 O1 -3.3(3) . . . . ?
 Ta1 N1 C1 C2 175.9(3) . . . . ?
 Ta1 N1 C5 C4 -175.4(3) . . . . ?
 O1 C1 C2 C3 -178.2(4) . . . . ?
 O1 C1 C2 C6A 1.9(6) . . . . ?
 N1 C1 C2 C3 2.7(6) . . . . ?
 N1 C1 C2 C6A -177.1(4) . . . . ?
 N1 C5 C4 C3 1.1(6) . . . . ?
 C1 N1 C5 C4 -0.4(6) . . . . ?
 C1 C2 C3 C4 -2.0(6) . . . . ?
 C1 C2 C6A F1A 53.4(7) . . . . ?
 C1 C2 C6A F2A -65.4(10) . . . . ?
 C1 C2 C6A F3A 167.8(6) . . . . ?
 C1 C2 C6A F3B -170.7(5) . . . . ?
 C1 C2 C6A F1B 68.1(8) . . . . ?
 C1 C2 C6A F2B -52.5(11) . . . . ?
 C2 C3 C4 C5 0.2(6) . . . . ?
 C5 N1 C1 Ta1 -177.5(4) . . . . ?
 C5 N1 C1 O1 179.2(3) . . . . ?
 C5 N1 C1 C2 -1.6(5) . . . . ?
 C3 C2 C6A F1A -126.4(6) . . . . ?
 C3 C2 C6A F2A 114.7(10) . . . . ?
 C3 C2 C6A F3A -12.0(8) . . . . ?
 C3 C2 C6A F3B 9.5(7) . . . . ?
 C3 C2 C6A F1B -111.7(8) . . . . ?
 C3 C2 C6A F2B 127.6(10) . . . . ?
 C6A C2 C3 C4 177.8(4) . . . . ?

_shelx_res_file
;
    twin4_a.res created by SHELXL-2014/7

TITL twin4_a.res in P-1
REM transformed to space group :
REM Old TITL twin4 in P-1
REM SHELXT solution in P-1
REM R1 0.059, Rweak 0.017, Alpha 0.165, Orientation as input
REM Formula found by SHELXT: C12 N O4 F3 Cl Ta
CELL 0.71073 7.9749 8.4683 14.7644 86.868 86.448 61.935
ZERR 2 0.0008 0.0006 0.0015 0.003 0.002 0.014
LATT 1
SFAC C H Cl F N O Ta
UNIT 24 42 2 6 8 2 2
RIGU

L.S. 10
PLAN  30
SIZE 0.07 0.12 0.16
TEMP -173(2)
BOND $H
LIST 6
MORE -1
CONF
fmap 2
acta 52
REM <olex2.extras>
REM <HklSrc "%./twin4_a.hkl">
REM </olex2.extras>

WGHT    0.018100    2.429500
BASF   0.00000
FVAR       0.47619
TA1   7   -1.217579    0.576411   -0.794089    11.00000    0.01353    0.01346 =
         0.00934    0.00153   -0.00221   -0.00618
CL1   3   -0.871456    0.394211   -0.774120    11.00000    0.01458    0.02061 =
         0.02004    0.00083   -0.00246   -0.00650
O1    6   -1.188213    0.758706   -0.708044    11.00000    0.02294    0.01719 =
         0.01675   -0.00187    0.00207   -0.01149
N2    5   -1.246787    0.364655   -0.818041    11.00000    0.02025    0.02052 =
         0.02555    0.00176   -0.00885   -0.01276
N1    5   -1.232601    0.542715   -0.638987    11.00000    0.01682    0.02083 =
         0.01258    0.00180   -0.00284   -0.00931
N4    5   -1.495406    0.733008   -0.786874    11.00000    0.01754    0.02234 =
         0.01491    0.00556   -0.00146   -0.00364
N3    5   -1.185659    0.690452   -0.907910    11.00000    0.02323    0.01736 =
         0.01924    0.00330    0.00130   -0.00667
C1    1   -1.213069    0.690849   -0.630219    11.00000    0.01424    0.02356 =
         0.01886   -0.00668    0.00244   -0.00966
C2    1   -1.222985    0.757338   -0.543492    11.00000    0.01493    0.04099 =
         0.02344   -0.01675    0.00333   -0.01381
C5    1   -1.257262    0.454069   -0.565564    11.00000    0.01480    0.03027 =
         0.02081    0.00821   -0.00124   -0.00830
AFIX  43
H5    2   -1.271429    0.350418   -0.573378    11.00000   -1.20000
AFIX   0
C3    1   -1.244846    0.662656   -0.468775    11.00000    0.01483    0.06168 =
         0.01703   -0.00787   -0.00203   -0.01264
AFIX  43
H3    2   -1.247827    0.702668   -0.409539    11.00000   -1.20000
AFIX   0
C4    1   -1.262462    0.509992   -0.479344    11.00000    0.01858    0.05093 =
         0.01884    0.00651   -0.00092   -0.00984
AFIX  43
H4    2   -1.277891    0.444902   -0.427894    11.00000   -1.20000
AFIX   0
PART 1
C11   1   -1.029058    0.722193   -0.938725    10.61571    0.03708    0.05342 =
         0.03422    0.01329    0.00153   -0.02308
AFIX 137
H11A  2   -0.940690    0.691504   -0.889611    10.61571   -1.50000
H11B  2   -1.077165    0.848782   -0.956563    10.61571   -1.50000
H11C  2   -0.962679    0.647909   -0.990986    10.61571   -1.50000
AFIX   0
C12   1   -1.329810    0.764985   -0.981886    10.61571    0.04113    0.05103 =
         0.02204    0.01049   -0.00682   -0.01247
AFIX 137
H12A  2   -1.271282    0.702771   -1.038414    10.61571   -1.50000
H12B  2   -1.371141    0.893237   -0.991479    10.61571   -1.50000
H12C  2   -1.439947    0.747002   -0.963459    10.61571   -1.50000
AFIX   0
PART 0
C7    1   -1.637050    0.687200   -0.744902    11.00000    0.02049    0.03992 =
         0.04996   -0.00806    0.01122   -0.01408
AFIX 137
H7A   2   -1.580324    0.557111   -0.735265    11.00000   -1.50000
H7B   2   -1.744459    0.727987   -0.784717    11.00000   -1.50000
H7C   2   -1.681934    0.745595   -0.686405    11.00000   -1.50000
AFIX   0
PART 1
C10   1   -1.127917    0.180662   -0.782545    10.60333    0.03792    0.02798 =
         0.07169    0.01868   -0.02386   -0.02356
AFIX 137
H10A  2   -1.053927    0.103708   -0.832811    10.60333   -1.50000
H10B  2   -1.209758    0.134420   -0.752619    10.60333   -1.50000
H10C  2   -1.041232    0.181834   -0.738664    10.60333   -1.50000
AFIX   0
PART 0
C9A   1   -1.373706    0.358604   -0.883792    11.00000    0.03183    0.03364 =
         0.02694   -0.00929   -0.00542   -0.01587
AFIX 137
H9AA  2   -1.445919    0.477708   -0.912063    11.00000   -1.50000
H9AB  2   -1.461897    0.321176   -0.852641    11.00000   -1.50000
H9AC  2   -1.298216    0.272879   -0.930665    11.00000   -1.50000
AFIX   0
PART 1
F1A   4   -1.358239    1.071672   -0.596014    10.49768    0.02848    0.02871 =
         0.05537   -0.02443   -0.00283   -0.00872
PART 0
C6A   1   -1.210077    0.925300   -0.536644    11.00000    0.03027    0.04964 =
         0.04638   -0.03380    0.01595   -0.02514
PART 1
F2A   4   -1.033077    0.893414   -0.567580    10.49768    0.02181    0.03386 =
         0.03243   -0.00908    0.00138   -0.01697
F3A   4   -1.251657    1.009299   -0.460291    10.49768    0.03398    0.04904 =
         0.04556   -0.03533    0.00847   -0.01960
PART 0
PART 2
C12A  1   -1.255617    0.690587   -0.993580    10.38429    0.01806    0.01915 =
         0.00888    0.00677    0.00283   -0.00179
AFIX 137
H12D  2   -1.148616    0.626688   -1.036604    10.38429   -1.50000
H12E  2   -1.331245    0.814292   -1.015705    10.38429   -1.50000
H12F  2   -1.335494    0.630874   -0.987828    10.38429   -1.50000
AFIX   0
C11A  1   -1.072996    0.792491   -0.908743    10.38429    0.03636    0.03113 =
         0.01650   -0.00015    0.00904   -0.02217
AFIX 137
H11D  2   -1.065985    0.823474   -0.846594    10.38429   -1.50000
H11E  2   -1.135686    0.902265   -0.946179    10.38429   -1.50000
H11F  2   -0.944229    0.717928   -0.933996    10.38429   -1.50000
AFIX   0
PART 0
PART 1
C8B   1   -1.570736    0.936212   -0.793422    10.64972    0.02510    0.01991 =
         0.03260    0.00776   -0.00137   -0.00491
AFIX 137
H8BA  2   -1.612535    0.985974   -0.732856    10.64972   -1.50000
H8BB  2   -1.678361    0.989863   -0.833529    10.64972   -1.50000
H8BC  2   -1.469493    0.962768   -0.818070    10.64972   -1.50000
AFIX   0
PART 0
PART 2
C8C   1   -1.601627    0.910142   -0.814521    10.35028    0.01635    0.02489 =
         0.03063    0.00471    0.00056   -0.00820
AFIX 137
H8CA  2   -1.657559    0.984134   -0.761129    10.35028   -1.50000
H8CB  2   -1.703276    0.921496   -0.852639    10.35028   -1.50000
H8CC  2   -1.519279    0.950254   -0.849375    10.35028   -1.50000
AFIX   0
C10A  1   -1.186200    0.207157   -0.756055    10.39667    0.03457    0.01375 =
         0.03350    0.00317   -0.00713   -0.01533
AFIX 137
H10D  2   -1.108503    0.214713   -0.709267    10.39667   -1.50000
H10E  2   -1.111226    0.098169   -0.790375    10.39667   -1.50000
H10F  2   -1.298519    0.203688   -0.727236    10.39667   -1.50000
AFIX   0
F3B   4   -1.192913    0.933628   -0.440519    10.50232    0.05637    0.04633 =
         0.03425   -0.02514    0.01316   -0.03737
F1B   4   -1.340313    1.057108   -0.564206    10.50232    0.03953    0.03248 =
         0.04695   -0.02512    0.01365   -0.02441
F2B   4   -1.062360    0.940387   -0.579382    10.50232    0.02438    0.03598 =
         0.03731   -0.01531    0.00275   -0.01572
HKLF 4

REM  twin4_a.res in P-1
REM R1 =  0.0292 for    4562 Fo > 4sig(Fo)  and  0.0377 for all    5107 data
REM    273 parameters refined using    267 restraints

END

WGHT      0.0180      2.5426

REM Highest difference peak  1.386,  deepest hole -1.252,  1-sigma level  0.168
Q1    1  -1.2391  0.5393 -0.7499  11.00000  0.05    1.39
Q2    1  -1.1604  0.6207 -0.8369  11.00000  0.05    1.32
Q3    1  -1.1525  0.6033 -0.7605  11.00000  0.05    1.13
Q4    1  -1.3020  0.6577 -0.7676  11.00000  0.05    1.08
Q5    1  -1.2917  0.5620 -0.8329  11.00000  0.05    1.01
Q6    1  -1.1223  0.5056 -0.8224  11.00000  0.05    0.92
Q7    1  -1.4181  0.2412 -0.8014  11.00000  0.05    0.83
Q8    1  -1.2352  0.7336 -0.7356  11.00000  0.05    0.74
Q9    1  -1.2090  0.4145 -0.8385  11.00000  0.05    0.73
Q10   1  -1.1344  0.6017 -0.6214  11.00000  0.05    0.73
Q11   1  -1.3827  0.6575 -0.8120  11.00000  0.05    0.69
Q12   1  -1.0627  0.4842 -0.7776  11.00000  0.05    0.65
Q13   1  -1.7534  0.7400 -0.6939  11.00000  0.05    0.64
Q14   1  -1.1910  0.7090 -0.5025  11.00000  0.05    0.64
Q15   1  -1.4354  0.7566 -0.7692  11.00000  0.05    0.63
Q16   1  -1.1141  0.7233 -0.8231  11.00000  0.05    0.60
Q17   1  -1.1895  0.9708 -0.5735  11.00000  0.05    0.60
Q18   1  -1.2400  0.8502 -0.8246  11.00000  0.05    0.60
Q19   1  -1.4312  0.6613 -0.9614  11.00000  0.05    0.60
Q20   1  -1.2532  0.6267 -0.6267  11.00000  0.05    0.57
Q21   1  -1.2843  0.4964 -0.6366  11.00000  0.05    0.57
Q22   1  -1.3090  0.2143 -0.5927  11.00000  0.05    0.56
Q23   1  -1.4181  0.3051 -0.6530  11.00000  0.05    0.56
Q24   1  -1.4370  0.4762 -0.7663  11.00000  0.05    0.55
Q25   1  -1.2330  0.9788 -1.0132  11.00000  0.05    0.55
Q26   1  -1.0519  0.9469 -0.6739  11.00000  0.05    0.55
Q27   1  -1.1181  0.8192 -0.6728  11.00000  0.05    0.55
Q28   1  -1.4808  0.7032 -0.8358  11.00000  0.05    0.55
Q29   1  -1.3364  0.5239 -0.6012  11.00000  0.05    0.55
Q30   1  -1.2243  0.5199 -0.5925  11.00000  0.05    0.54
;
_shelx_res_checksum               34404
_shelx_hkl_file
;
  -1  -1   0 4708.53   52.13
  -2  -2   0    6.12    2.24
  -3  -3   0 1418.16   20.49
  -4  -4   0  513.08   18.79
  -5  -5   0    8.51    4.07
  -6  -6   0  463.72   12.75
  -7  -7   0  822.49   27.79
  -8  -8   0  403.23   21.19
  -9  -9   0   17.92   12.35
   9  10   0   16.37   28.64
   8   9   0  672.09   25.30
   7   8   0  995.15   31.19
   6   7   0   93.48   15.41
   5   6   0  477.26   11.90
   4   5   0 1460.22   22.56
   3   4   0  490.40   12.72
   2   3   0 2017.46   24.21
   1   2   0 4355.70   48.61
   0   1   0 5196.47   43.66
  -1   0   0  590.81    5.80
  -2  -1   0  658.02    8.91
  -3  -2   0 1791.76   24.70
  -4  -3   0  726.15   24.04
  -5  -4   0    4.43    3.83
  -6  -5   0 1820.23   28.75
  -7  -6   0 1036.17   22.86
  -8  -7   0   11.73   18.45
  -9  -8   0  333.65   26.34
 -10  -9   0  359.14   34.06
   8  10   0  543.97   25.93
   7   9   0  324.96   21.15
   6   8   0   44.23   11.67
   5   7   0  565.25   15.51
   4   6   0 1035.91   15.99
   3   5   0   80.39   14.63
   2   4   0  222.19    5.18
   1   3   0 3111.16   34.37
   0   2   0  816.17    9.75
  -1   1   0 1228.50   15.59
  -2   0   0 9553.67   91.38
  -3  -1   0 4851.18   50.62
  -4  -2   0  327.24   19.77
  -5  -3   0  533.81   18.74
  -6  -4   0 1282.20   21.74
  -7  -5   0  233.25   13.14
  -8  -6   0   45.77   13.43
  -9  -7   0  714.75   38.44
 -10  -8   0  435.50   37.77
   8  11   0  180.79   21.85
   7  10   0   66.35   21.21
   6   9   0  306.81   13.89
   5   8   0 1021.23   27.29
   4   7   0  526.88   13.23
   3   6   0  203.95   15.87
   2   5   0 2641.09   36.57
   1   4   0 1311.23   16.03
   0   3   0  201.70    3.66
  -1   2   0 2590.19   43.08
  -2   1   0 9999.00   88.17
  -3   0   0 1990.96   20.83
  -4  -1   0   60.46    3.95
  -5  -2   0  815.16   13.58
  -6  -3   0  787.08   15.46
  -7  -4   0   14.10    6.35
  -8  -5   0  701.63   24.73
  -9  -6   0  757.30   29.04
 -10  -7   0  312.17   23.37
   7  11   0  113.05   17.33
   6  10   0  539.51   24.31
   5   9   0  881.92   32.33
   4   8   0    1.61    6.32
   3   7   0  517.97   11.94
   2   6   0 1023.52   16.03
   1   5   0  554.87    9.89
   0   4   0  229.22    4.31
  -1   3   0 1709.26   24.48
  -2   2   0 3198.49   39.36
  -3   1   0   94.20    3.40
  -4   0   0 1709.85   20.36
  -5  -1   0 1852.51   21.61
  -6  -2   0   49.61    4.88
  -7  -3   0   86.80    6.58
  -8  -4   0 1187.06   27.73
  -9  -5   0  748.14   18.77
 -10  -6   0   37.68   15.03
 -11  -7   0   93.84   30.55
   6  11   0  440.93   27.03
   5  10   0  211.20   18.42
   4   9   0   47.97   15.56
   3   8   0  659.91   18.42
   2   7   0  520.14   12.97
   1   6   0   25.28   10.71
   0   5   0  845.65   11.72
  -1   4   0 2648.52   34.72
  -2   3   0 1143.17   18.37
  -3   2   0  411.31    5.96
  -4   1   0 2740.34   30.89
  -5   0   0 1768.97   26.23
  -6  -1   0    2.27   12.16
  -7  -2   0  494.35   11.76
  -8  -3   0 1025.85   23.49
  -9  -4   0  192.16   10.75
 -10  -5   0   40.91   19.90
 -11  -6   0  435.12   51.51
   5  11   0   20.62   15.42
   4  10   0  240.01   17.64
   3   9   0  678.86   19.35
   2   8   0  175.09   16.16
   1   7   0  425.07   15.38
   0   6   0 2014.49   29.07
  -1   5   0 1852.67   26.13
  -2   4   0   13.10   10.46
  -3   3   0  740.23   13.12
  -4   2   0 1942.72   25.50
  -5   1   0  209.17   11.68
  -6   0   0  261.42   15.78
  -7  -1   0  598.41   14.07
  -8  -2   0  509.67   13.14
  -9  -3   0    8.20   13.46
 -10  -4   0  372.00   24.48
 -11  -5   0  594.88   33.08
   4  11   0  349.48   19.84
   3  10   0  286.00   16.96
   2   9   0   25.81   16.86
   1   8   0  664.31   18.50
   0   7   0  767.52   13.97
  -1   6   0  380.19   22.17
  -2   5   0  141.48   16.61
  -3   4   0  878.83   21.47
  -4   3   0  960.51   15.27
  -5   2   0   29.72    4.72
  -6   1   0  855.77   21.49
  -7   0   0 1261.70   24.75
  -8  -1   0   62.46    7.88
  -9  -2   0  149.31   16.93
 -10  -3   0  556.56   24.69
 -11  -4   0  309.39   31.10
   3  11   0   96.05   18.77
   2  10   0  103.11   13.60
   1   9   0  663.22   20.33
   0   8   0  506.27   11.82
  -1   7   0   16.68   14.18
  -2   6   0  739.43   40.91
  -3   5   0 1500.42   44.39
  -4   4   0  477.36   13.31
  -5   3   0  139.96    6.27
  -6   2   0  842.03   18.60
  -7   1   0  478.55   18.69
  -8   0   0   62.95    9.33
  -9  -1   0  325.82   17.57
 -10  -2   0  502.85   23.31
   2  11   0  275.11   18.29
   1  10   0  361.23   19.66
   0   9   0   98.38   25.10
  -1   8   0  264.62   37.53
  -2   7   0  881.40   40.92
  -3   6   0  820.11   42.44
  -4   5   0   62.30   17.29
  -5   4   0  261.53    7.16
  -6   3   0  545.86   14.11
  -7   2   0   72.94   13.40
  -8   1   0  366.17   18.72
  -9   0   0  548.12   18.35
 -10  -1   0  311.37   21.16
   0  10   0  131.84   48.30
  -1   9   0  469.48   60.12
  -2   8   0  632.33   46.22
  -3   7   0  272.48   32.20
  -4   6   0   61.42   16.67
  -5   5   0  500.77   35.91
  -6   4   0  261.37   10.47
  -7   3   0    2.70   12.06
  -8   2   0  350.38   16.18
  -9   1   0  452.49   18.16
  -2   9   0  359.50   41.74
  -3   8   0    0.00   44.80
  -4   7   0  419.15   38.13
  -5   6   0  558.48   61.98
  -6   5   0  158.69   24.52
  -7   4   0   70.05   12.93
  -8   3   0  247.22   15.33
   8  -3  -1  173.96   15.60
   7  -4  -1  264.06   16.51
   6  -5  -1  452.31   32.63
   5  -6  -1   42.63   28.76
   4  -7  -1  240.35   30.87
   3  -8  -1  323.67   42.57
   2  -9  -1   59.21   56.94
   9  -1  -1   28.53    9.48
   8  -2  -1  398.64   17.89
   7  -3  -1  653.05   22.00
   6  -4  -1  286.60   25.86
   5  -5  -1   92.31   27.61
   4  -6  -1  487.67   25.50
   3  -7  -1  263.31   36.02
   2  -8  -1   16.04   18.76
   1  -9  -1  463.69   60.71
   0 -10  -1  519.84   59.06
  10   1  -1   21.65   15.95
   9   0  -1  162.87   13.47
   8  -1  -1  693.28   21.84
   7  -2  -1  578.52   15.36
   6  -3  -1   24.29    8.46
   5  -4  -1  619.27   30.43
   4  -5  -1 1020.11   35.26
   3  -6  -1  109.54   21.05
   2  -7  -1  217.76   18.48
   1  -8  -1  728.51   62.41
   0  -9  -1  299.01   42.53
  -1 -10  -1    0.68    9.20
  -2 -11  -1  225.31   16.56
  10   2  -1   61.34   14.80
   9   1  -1  466.11   19.36
   8   0  -1  705.17   18.96
   7  -1  -1  125.03   11.15
   6  -2  -1  308.33   12.74
   5  -3  -1  948.69   15.12
   4  -4  -1  652.86   34.29
   3  -5  -1   14.35   12.96
   2  -6  -1  578.72   34.59
   1  -7  -1  519.37   34.04
   0  -8  -1  131.16   11.98
  -1  -9  -1  328.57   13.43
  -2 -10  -1  818.37   24.17
  -3 -11  -1  415.82   22.30
  11   4  -1   63.95   29.38
  10   3  -1  137.35   19.11
   9   2  -1  505.30   18.91
   8   1  -1  221.72   11.57
   7   0  -1   33.26   11.97
   6  -1  -1  743.58   20.12
   5  -2  -1 1450.42   20.79
   4  -3  -1  332.88    7.17
   3  -4  -1  188.99   14.09
   2  -5  -1 1320.20   34.46
   1  -6  -1  534.28   19.82
   0  -7  -1   82.96    8.71
  -1  -8  -1 1122.48   22.14
  -2  -9  -1  973.29   24.81
  -3 -10  -1  176.53   18.02
  -4 -11  -1   30.79   14.53
  11   5  -1    0.00   16.96
  10   4  -1  314.91   25.11
   9   3  -1  538.30   19.67
   8   2  -1   35.84    7.09
   7   1  -1  696.16   18.17
   6   0  -1 1642.77   28.88
   5  -1  -1 1098.42   17.23
   4  -2  -1   55.91    3.90
   3  -3  -1  776.15    9.35
   2  -4  -1 1437.58   36.74
   1  -5  -1   80.17   10.58
   0  -6  -1  751.32   13.63
  -1  -7  -1 1218.97   21.71
  -2  -8  -1  859.01   18.41
  -3  -9  -1    4.39    6.21
  -4 -10  -1  346.23   20.14
  -5 -11  -1  428.71   22.27
  11   6  -1   54.31   44.65
  10   5  -1  372.57   23.17
   9   4  -1  217.47   12.69
   8   3  -1  232.64   14.32
   7   2  -1  929.97   17.33
   6   1  -1 1324.57   22.27
   5   0  -1  591.26   11.18
   4  -1  -1  187.36    4.92
   3  -2  -1 1382.20   14.85
   2  -3  -1  809.76   25.31
   1  -4  -1  113.51    9.96
   0  -5  -1 2942.17   31.25
  -1  -6  -1 1313.04   20.96
  -2  -7  -1  119.53    9.61
  -3  -8  -1  399.78   14.31
  -4  -9  -1 1251.93   36.10
  -5 -10  -1  366.12   19.05
  -6 -11  -1    5.49   19.07
  11   7  -1  248.25   34.19
  10   6  -1  192.87   20.84
   9   5  -1   30.32   13.95
   8   4  -1  575.09   15.81
   7   3  -1 1435.40   22.47
   6   2  -1  449.83   10.83
   5   1  -1   19.56    5.83
   4   0  -1 1058.74   13.78
   3  -1  -1 3212.62   34.85
   2  -2  -1  369.97    8.35
   1  -3  -1  911.99   21.45
   0  -4  -1 2096.27   22.29
  -1  -5  -1  876.95   13.09
  -2  -6  -1  211.88    9.89
  -3  -7  -1 1114.54   18.21
  -4  -8  -1 1159.88   24.07
  -5  -9  -1  155.75   16.00
  -6 -10  -1  139.65   18.06
  -7 -11  -1  213.80   21.49
  10   7  -1   99.93   15.82
   9   6  -1   18.51   17.85
   8   5  -1  685.96   20.60
   7   4  -1 1080.73   23.53
   6   3  -1  217.18    7.66
   5   2  -1 1259.24   22.58
   4   1  -1 4178.17   42.21
   3   0  -1 2408.77   26.66
   2  -1  -1   27.22    1.70
   1  -2  -1 1322.02   26.68
   0  -3  -1 1237.41   13.46
  -1  -4  -1    6.80    1.95
  -2  -5  -1  943.23   23.79
  -3  -6  -1 2276.82   31.04
  -4  -7  -1 1045.22   19.67
  -5  -8  -1   16.05   11.75
  -6  -9  -1  678.69   25.19
  -7 -10  -1  392.16   26.02
  -8 -11  -1   31.90   25.27
  10   8  -1    1.54   30.22
   9   7  -1  238.52   27.93
   8   6  -1  631.44   20.37
   7   5  -1  366.90   16.27
   6   4  -1  398.13   11.07
   5   3  -1 1747.88   35.15
   4   2  -1  960.61   17.79
   3   1  -1 1086.35   13.26
   2   0  -1  255.35    4.04
   1  -1  -1 1660.19   30.88
   0  -2  -1 3004.98   27.76
  -1  -3  -1  378.53    6.29
  -2  -4  -1 6739.24   71.63
  -3  -5  -1 2748.76   31.87
  -4  -6  -1   63.03    4.83
  -5  -7  -1  420.96   13.39
  -6  -8  -1  810.45   23.09
  -7  -9  -1  244.78   17.19
  -8 -10  -1    9.43   11.25
  10   9  -1    0.19   28.57
   9   8  -1  326.65   22.56
   8   7  -1  240.13   23.59
   7   6  -1   38.63   12.60
   6   5  -1  739.50   15.65
   5   4  -1 3231.21   44.61
   4   3  -1  897.08   15.18
   3   2  -1  217.83    5.96
   2   1  -1 1579.99   18.94
   1   0  -1 6904.48   61.22
   0  -1  -1   94.98    1.41
  -1  -2  -1 1040.88   10.98
  -2  -3  -1 2643.72   30.96
  -3  -4  -1 1135.33   17.33
  -4  -5  -1   45.12    4.44
  -5  -6  -1  893.56   16.90
  -6  -7  -1  785.12   24.58
  -7  -8  -1  135.56   14.34
  -8  -9  -1  273.02   19.34
  -9 -10  -1  363.81   31.81
   9   9  -1  455.44   24.97
   8   8  -1  163.27   20.18
   7   7  -1  277.53   15.27
   6   6  -1 2062.66   32.23
   5   5  -1 1354.01   22.25
   4   4  -1  233.86   11.80
   3   3  -1 1147.06   17.30
   2   2  -1  733.41   11.35
   1   1  -1 2576.45   29.13
   0   0  -1   44.80    3.31
  -1  -1  -1 4686.08   47.07
  -2  -2  -1 4494.33   50.85
  -3  -3  -1    6.79    2.69
  -4  -4  -1 1913.64   30.01
  -5  -5  -1 2304.45   33.62
  -6  -6  -1  735.08   17.73
  -7  -7  -1   42.53   10.46
  -8  -8  -1  550.77   25.03
  -9  -9  -1  357.43   23.57
   9  10  -1  188.02   29.75
   8   9  -1    3.65   12.11
   7   8  -1  416.41   17.83
   6   7  -1  823.38   23.88
   5   6  -1  758.06   15.46
   4   5  -1   15.43    4.02
   3   4  -1 1832.55   36.57
   2   3  -1 2587.99   30.55
   1   2  -1   58.19    2.50
   0   1  -1 4700.45   43.37
  -1   0  -1 6140.04   50.53
  -2  -1  -1  404.47    5.75
  -3  -2  -1  673.01   11.26
  -4  -3  -1 2767.67   40.44
  -5  -4  -1 1712.44   26.18
  -6  -5  -1  144.74    8.26
  -7  -6  -1  148.29   12.05
  -8  -7  -1  656.71   24.99
  -9  -8  -1  148.36   20.92
 -10  -9  -1   50.21   29.90
   8  10  -1   58.66   13.10
   7   9  -1  782.91   24.59
   6   8  -1  360.00   18.01
   5   7  -1    2.53    5.53
   4   6  -1 1291.03   21.10
   3   5  -1 3191.96   40.51
   2   4  -1  664.91   10.06
   1   3  -1   73.00    2.97
   0   2  -1  366.60    5.46
  -1   1  -1 3429.81   34.23
  -2   0  -1 1670.77   15.89
  -3  -1  -1 1703.44   19.18
  -4  -2  -1 2898.92   40.45
  -5  -3  -1 1644.25   27.60
  -6  -4  -1  215.96    8.85
  -7  -5  -1 1035.60   25.73
  -8  -6  -1  355.89   17.44
  -9  -7  -1    3.76   24.44
 -10  -8  -1  336.30   33.83
   8  11  -1  200.70   23.17
   7  10  -1  309.84   24.63
   6   9  -1  115.70   14.16
   5   8  -1  328.45   16.01
   4   7  -1 1850.88   30.15
   3   6  -1 1999.38   28.09
   2   5  -1  402.37   12.20
   1   4  -1 1002.61   13.49
   0   3  -1  825.85   10.18
  -1   2  -1  183.68    7.34
  -2   1  -1  367.16    5.01
  -3   0  -1 4674.33   46.15
  -4  -1  -1 3517.87   38.00
  -5  -2  -1   34.24    8.03
  -6  -3  -1  634.93   12.04
  -7  -4  -1 1388.94   25.52
  -8  -5  -1  244.15   15.97
  -9  -6  -1   78.32   22.73
 -10  -7  -1  389.57   24.57
   7  11  -1  121.75   17.85
   6  10  -1   11.52   17.88
   5   9  -1  620.53   22.06
   4   8  -1 1280.10   29.09
   3   7  -1  400.98   11.86
   2   6  -1  113.50   10.12
   1   5  -1 1513.15   20.00
   0   4  -1  571.50    9.36
  -1   3  -1   24.21    5.85
  -2   2  -1 2888.17   31.01
  -3   1  -1 4722.39   50.48
  -4   0  -1 1807.58   21.43
  -5  -1  -1  219.08   11.29
  -6  -2  -1 1238.70   17.79
  -7  -3  -1  507.95   11.99
  -8  -4  -1    7.60   11.21
  -9  -5  -1  165.89   16.62
 -10  -6  -1  395.38   25.56
 -11  -7  -1   83.24   31.54
   6  11  -1  183.47   22.32
   5  10  -1  745.64   23.52
   4   9  -1  558.71   24.42
   3   8  -1    2.58    6.24
   2   7  -1  769.91   18.74
   1   6  -1 1829.71   23.56
   0   5  -1  664.89   11.21
  -1   4  -1  256.10    5.62
  -2   3  -1 1049.58   15.19
  -3   2  -1 1811.51   26.68
  -4   1  -1   84.19    4.18
  -5   0  -1 1266.90   22.81
  -6  -1  -1 1662.43   24.35
  -7  -2  -1  716.66   14.34
  -8  -3  -1   54.87    9.64
  -9  -4  -1  619.29   20.26
 -10  -5  -1  230.79   19.38
 -11  -6  -1    0.00   46.75
   5  11  -1  379.74   20.84
   4  10  -1   57.99   17.66
   3   9  -1  114.70   11.85
   2   8  -1 1157.12   29.56
   1   7  -1  751.06   14.81
   0   6  -1  186.98    7.83
  -1   5  -1  932.19   16.43
  -2   4  -1  912.58   16.52
  -3   3  -1   41.20    6.93
  -4   2  -1  664.11   11.31
  -5   1  -1 3462.12   39.88
  -6   0  -1 2076.24   29.37
  -7  -1  -1   75.73    9.33
  -8  -2  -1  251.97   10.11
  -9  -3  -1  391.88   17.66
 -10  -4  -1   54.03   18.03
 -11  -5  -1  116.86   21.38
   4  11  -1   17.21   15.63
   3  10  -1  477.00   21.46
   2   9  -1  973.22   27.00
   1   8  -1  202.20    8.94
   0   7  -1  205.20   11.33
  -1   6  -1  950.31   17.97
  -2   5  -1  290.62    9.26
  -3   4  -1   96.92    5.69
  -4   3  -1 1073.56   16.41
  -5   2  -1 1674.13   23.56
  -6   1  -1  910.59   22.03
  -7   0  -1   46.71   15.24
  -8  -1  -1  562.78   15.75
  -9  -2  -1  283.53   17.43
 -10  -3  -1    3.69   13.65
 -11  -4  -1  245.51   30.94
   3  11  -1  557.06   23.39
   2  10  -1  333.52   17.88
   1   9  -1   16.61   12.11
   0   8  -1  382.17   14.84
  -1   7  -1  677.45   19.91
  -2   6  -1  192.17   16.56
  -3   5  -1  152.22   10.30
  -4   4  -1  945.51   18.10
  -5   3  -1  765.95   13.35
  -6   2  -1   30.21   12.35
  -7   1  -1 1023.28   23.22
  -8   0  -1  897.84   22.18
  -9  -1  -1  145.40   14.06
 -10  -2  -1   76.83   16.32
   2  11  -1   61.24   12.08
   1  10  -1   96.14   19.15
   0   9  -1  524.20   16.50
  -1   8  -1  284.10   33.12
  -2   7  -1    0.00   14.92
  -3   6  -1  610.46   33.26
  -4   5  -1  716.77   40.79
  -5   4  -1   37.85    4.93
  -6   3  -1  322.98   14.87
  -7   2  -1 1077.66   22.11
  -8   1  -1  695.34   21.51
  -9   0  -1   10.88    8.17
 -10  -1  -1  134.96   18.83
   0  10  -1  393.46   50.65
  -1   9  -1   56.88   43.60
  -2   8  -1  135.26   27.06
  -3   7  -1  583.07   38.54
  -4   6  -1  251.91   22.73
  -5   5  -1   10.59   39.81
  -6   4  -1  495.90   13.83
  -7   3  -1  621.10   17.18
  -8   2  -1  252.07   15.59
  -9   1  -1   40.80   11.10
  -2   9  -1  235.45   39.94
  -3   8  -1  339.89   56.25
  -4   7  -1   24.12   28.03
  -5   6  -1  153.51   45.19
  -6   5  -1  600.49   31.43
  -7   4  -1  277.12   16.04
  -8   3  -1   45.09   13.54
   8  -3  -2  124.68   13.47
   7  -4  -2   32.70   28.44
   6  -5  -2  402.12   31.75
   5  -6  -2  657.97   40.33
   4  -7  -2  188.42   31.97
   3  -8  -2   35.59   37.58
   2  -9  -2  544.85   66.58
   9  -1  -2  368.78   16.58
   8  -2  -2    7.56   11.61
   7  -3  -2   78.15   14.36
   6  -4  -2  748.83   37.34
   5  -5  -2  422.33   33.45
   4  -6  -2   24.30   18.97
   3  -7  -2  393.53   36.30
   2  -8  -2  501.01   34.81
   1  -9  -2  109.69   45.35
   0 -10  -2   64.55   46.14
  10   1  -2  357.22   18.56
   9   0  -2  245.67   13.77
   8  -1  -2   18.49   12.71
   7  -2  -2  303.45   14.20
   6  -3  -2  516.58   14.50
   5  -4  -2   90.66   20.05
   4  -5  -2  236.29   23.69
   3  -6  -2 1266.07   37.90
   2  -7  -2  626.82   26.57
   1  -8  -2   14.91   45.20
   0  -9  -2  317.52   47.27
  -1 -10  -2  460.01   18.87
  -2 -11  -2   47.37    9.83
  10   2  -2  551.16   22.03
   9   1  -2  167.38   18.64
   8   0  -2  108.91   12.99
   7  -1  -2  634.73   18.92
   6  -2  -2  282.62   10.58
   5  -3  -2  147.08    6.16
   4  -4  -2 1428.50   42.88
   3  -5  -2 1685.79   43.32
   2  -6  -2  217.96   26.02
   1  -7  -2   87.74   16.73
   0  -8  -2  635.58   54.96
  -1  -9  -2  247.65   11.10
  -2 -10  -2    5.54    7.84
  -3 -11  -2  328.54   19.15
  10   3  -2  354.60   20.04
   9   2  -2   27.07   16.41
   8   1  -2  368.48   13.59
   7   0  -2  536.80   17.77
   6  -1  -2   31.30    8.11
   5  -2  -2  517.01   11.55
   4  -3  -2 1327.39   18.42
   3  -4  -2 1029.09   31.91
   2  -5  -2   11.57   18.02
   1  -6  -2  480.20   19.01
   0  -7  -2  863.00   15.02
  -1  -8  -2  160.03    8.13
  -2  -9  -2  318.62   19.78
  -3 -10  -2  703.61   24.47
  -4 -11  -2  214.82   18.29
  11   5  -2  321.35   27.94
  10   4  -2   88.95   19.45
   9   3  -2  180.97   15.30
   8   2  -2  614.06   16.97
   7   1  -2  376.22   13.08
   6   0  -2  116.24    8.21
   5  -1  -2 1284.18   21.33
   4  -2  -2 1382.35   21.89
   3  -3  -2  205.60    5.50
   2  -4  -2  360.10   16.62
   1  -5  -2 3267.52   62.68
   0  -6  -2  823.07   12.05
  -1  -7  -2   36.66    8.35
  -2  -8  -2  684.46   20.09
  -3  -9  -2  669.33   18.76
  -4 -10  -2   12.86   15.52
  -5 -11  -2  122.17   16.24
  11   6  -2   78.21   24.11
  10   5  -2   43.58   17.35
   9   4  -2  540.33   16.85
   8   3  -2  863.22   20.97
   7   2  -2   26.80    5.56
   6   1  -2  488.89   14.93
   5   0  -2 1316.56   23.24
   4  -1  -2  686.78    9.93
   3  -2  -2  410.57    6.49
   2  -3  -2 2437.26   46.77
   1  -4  -2 3017.80   58.38
   0  -5  -2  402.92    6.24
  -1  -6  -2  219.64   14.52
  -2  -7  -2  733.37   17.97
  -3  -8  -2  288.20   12.43
  -4  -9  -2   58.29   15.39
  -5 -10  -2  653.40   22.44
  -6 -11  -2  569.77   27.85
  10   6  -2  245.69   30.29
   9   5  -2  574.75   18.50
   8   4  -2  400.62   16.07
   7   3  -2   34.11    5.94
   6   2  -2  694.44   14.59
   5   1  -2 1062.73   16.80
   4   0  -2   73.68    4.02
   3  -1  -2 1054.55   12.96
   2  -2  -2 2761.77   34.08
   1  -3  -2 2515.76   54.78
   0  -4  -2   23.79    1.83
  -1  -5  -2  860.55   13.59
  -2  -6  -2 1279.86   18.38
  -3  -7  -2   41.40    4.92
  -4  -8  -2  585.34   17.88
  -5  -9  -2 1475.21   37.85
  -6 -10  -2  265.64   21.47
  -7 -11  -2    0.00   12.63
  10   7  -2  443.14   26.14
   9   6  -2  360.35   21.97
   8   5  -2   93.71   14.25
   7   4  -2  328.27   11.43
   6   3  -2  718.99   13.31
   5   2  -2  457.86    9.50
   4   1  -2  321.08    6.49
   3   0  -2 4473.18   47.95
   2  -1  -2 3639.18   36.53
   1  -2  -2  241.25   18.23
   0  -3  -2  862.67    9.02
  -1  -4  -2 4382.65   47.41
  -2  -5  -2 1002.86   16.29
  -3  -6  -2  127.55   13.97
  -4  -7  -2  812.52   16.63
  -5  -8  -2 1165.42   28.15
  -6  -9  -2   51.61   13.74
  -7 -10  -2  159.47   21.76
  -8 -11  -2  303.42   27.60
  10   8  -2  489.73   37.53
   9   7  -2  212.67   28.69
   8   6  -2   21.48   14.42
   7   5  -2  676.10   18.45
   6   4  -2 1647.04   26.35
   5   3  -2   33.35    9.74
   4   2  -2 2915.86   45.24
   3   1  -2 2120.60   23.81
   2   0  -2  430.92    5.79
   1  -1  -2 1566.74   16.30
   0  -2  -2  910.29    9.25
  -1  -3  -2 3863.13   38.04
  -2  -4  -2  776.60   10.72
  -3  -5  -2  562.94   20.16
  -4  -6  -2 1852.56   23.90
  -5  -7  -2  235.30   10.52
  -6  -8  -2   63.50   10.98
  -7  -9  -2  987.24   26.42
  -8 -10  -2  520.62   25.54
  10   9  -2  430.71   36.22
   9   8  -2    7.43   11.70
   8   7  -2  353.11   24.99
   7   6  -2  573.62   16.62
   6   5  -2  162.64    8.71
   5   4  -2   42.30    4.89
   4   3  -2  842.44   26.62
   3   2  -2 1148.27   17.19
   2   1  -2  493.51    6.87
   1   0  -2 1020.10   11.42
   0  -1  -2 5473.10   58.34
  -1  -2  -2 4391.25   39.91
  -2  -3  -2  849.50   10.53
  -3  -4  -2 2670.68   38.77
  -4  -5  -2 1294.88   20.72
  -5  -6  -2    3.18    4.18
  -6  -7  -2  666.00   20.15
  -7  -8  -2 1303.66   33.90
  -8  -9  -2  390.16   21.89
  -9 -10  -2   28.51   21.49
   9   9  -2   59.49   14.48
   8   8  -2  593.34   23.43
   7   7  -2  558.94   20.07
   6   6  -2   59.07    6.56
   5   5  -2 1015.58   18.31
   4   4  -2 2128.88   41.58
   3   3  -2  362.72    8.44
   2   2  -2 1869.31   25.26
   1   1  -2 3876.89   48.70
   0   0  -2 2851.72   38.68
  -1  -1  -2   19.49    1.24
  -2  -2  -2  127.29    3.66
  -3  -3  -2 3718.30   49.52
  -4  -4  -2  886.84   16.82
  -5  -5  -2  225.39    8.50
  -6  -6  -2 1157.34   21.79
  -7  -7  -2 1363.82   32.73
  -8  -8  -2   95.82   19.10
  -9  -9  -2  208.44   21.08
   9  10  -2  297.83   31.40
   8   9  -2  832.37   28.81
   7   8  -2  114.95   16.62
   6   7  -2  155.67   17.48
   5   6  -2  689.27   14.69
   4   5  -2 1033.72   19.14
   3   4  -2    3.08    6.59
   2   3  -2 2397.61   28.71
   1   2  -2 2854.67   30.61
   0   1  -2 3060.49   44.16
  -1   0  -2  326.60    4.19
  -2  -1  -2  875.06    9.62
  -3  -2  -2  636.92    9.71
  -4  -3  -2   31.83    8.26
  -5  -4  -2 1445.97   22.93
  -6  -5  -2 1963.40   30.58
  -7  -6  -2  310.59   17.08
  -8  -7  -2   74.57   15.06
  -9  -8  -2  708.03   29.06
 -10  -9  -2  454.89   33.90
   8  10  -2  385.67   19.24
   7   9  -2   32.42   18.68
   6   8  -2  292.81   17.48
   5   7  -2  599.95   16.37
   4   6  -2  348.02    9.87
   3   5  -2  279.74   12.30
   2   4  -2 3657.65   44.55
   1   3  -2 3562.30   36.39
   0   2  -2    5.08    2.28
  -1   1  -2  368.65    9.19
  -2   0  -2 1478.36   15.10
  -3  -1  -2 1077.94   12.00
  -4  -2  -2  522.89   12.80
  -5  -3  -2 2141.85   38.44
  -6  -4  -2 1692.51   26.78
  -7  -5  -2    0.00   11.62
  -8  -6  -2  459.41   17.39
  -9  -7  -2  978.97   41.24
 -10  -8  -2  212.04   33.73
   8  11  -2   88.44   18.03
   7  10  -2   51.06   21.98
   6   9  -2  562.45   17.73
   5   8  -2  307.61   16.85
   4   7  -2   41.86    6.18
   3   6  -2 1552.57   30.99
   2   5  -2 2680.95   43.98
   1   4  -2  377.81    6.92
   0   3  -2  403.38    7.07
  -1   2  -2 3393.86   34.92
  -2   1  -2 2464.09   24.72
  -3   0  -2  453.34    6.07
  -4  -1  -2  543.18    8.39
  -5  -2  -2 1696.21   27.20
  -6  -3  -2  318.64    8.46
  -7  -4  -2  546.93   12.50
  -8  -5  -2  902.14   22.79
  -9  -6  -2  813.03   36.30
 -10  -7  -2   44.92   14.23
   7  11  -2  330.45   27.55
   6  10  -2  589.31   24.10
   5   9  -2  135.94   19.53
   4   8  -2  413.68   16.37
   3   7  -2  854.19   18.87
   2   6  -2  960.09   16.38
   1   5  -2   22.17    3.45
   0   4  -2 1603.87   19.36
  -1   3  -2 1596.55   27.89
  -2   2  -2 1728.25   25.24
  -3   1  -2   12.89    2.09
  -4   0  -2  901.52   12.37
  -5  -1  -2  632.29    9.68
  -6  -2  -2   22.47    6.08
  -7  -3  -2 1219.34   21.50
  -8  -4  -2 1648.21   33.72
  -9  -5  -2  214.93   19.55
 -10  -6  -2   30.72   26.56
 -11  -7  -2  381.78   34.38
   6  11  -2  337.46   25.16
   5  10  -2   41.92   17.00
   4   9  -2  384.90   21.81
   3   8  -2  574.44   18.11
   2   7  -2   56.89    8.19
   1   6  -2  289.56    9.54
   0   5  -2 3450.30   44.82
  -1   4  -2 2286.24   33.57
  -2   3  -2  106.49   12.11
  -3   2  -2 1130.22   15.64
  -4   1  -2 1236.81   15.88
  -5   0  -2  227.57    8.96
  -6  -1  -2  462.32   15.97
  -7  -2  -2  907.15   16.37
  -8  -3  -2  899.65   21.36
  -9  -4  -2   12.37   10.40
 -10  -5  -2  261.68   19.64
 -11  -6  -2  420.08   36.55
   5  11  -2  150.06   18.37
   4  10  -2  424.82   20.89
   3   9  -2  179.24   13.45
   2   8  -2  162.28   14.32
   1   7  -2 1156.11   25.63
   0   6  -2 1877.83   28.58
  -1   5  -2  489.03   13.80
  -2   4  -2  321.88    9.07
  -3   3  -2 1074.53   15.94
  -4   2  -2  826.10   11.63
  -5   1  -2   56.90    5.96
  -6   0  -2  471.82   16.73
  -7  -1  -2 1216.15   22.63
  -8  -2  -2  222.08    9.90
  -9  -3  -2  357.41   19.29
 -10  -4  -2  647.03   27.64
 -11  -5  -2  315.41   28.99
   4  11  -2  291.33   19.06
   3  10  -2   39.49   18.94
   2   9  -2  250.69   19.01
   1   8  -2  967.76   24.41
   0   7  -2  793.61   16.13
  -1   6  -2    4.44    3.36
  -2   5  -2  924.73   15.30
  -3   4  -2  898.63   21.73
  -4   3  -2  176.57    9.21
  -5   2  -2  152.84    7.09
  -6   1  -2  929.45   22.03
  -7   0  -2  418.51   15.03
  -8  -1  -2    7.87    6.38
  -9  -2  -2  593.25   24.23
 -10  -3  -2  680.39   26.67
 -11  -4  -2   73.98   24.84
   3  11  -2   16.25   19.87
   2  10  -2  489.04   25.40
   1   9  -2  487.63   21.31
   0   8  -2   36.40    8.47
  -1   7  -2  374.67   11.44
  -2   6  -2 1231.97   19.23
  -3   5  -2  818.82   20.61
  -4   4  -2    0.00   13.76
  -5   3  -2  389.22    9.56
  -6   2  -2  727.34   18.80
  -7   1  -2  202.04   12.26
  -8   0  -2  228.49   15.31
  -9  -1  -2  675.79   26.87
 -10  -2  -2  385.42   22.39
   2  11  -2  367.10   23.46
   1  10  -2  101.85   22.08
   0   9  -2   85.64    9.90
  -1   8  -2  677.05   16.82
  -2   7  -2 1001.50   51.81
  -3   6  -2  322.24   35.23
  -4   5  -2  106.67    8.89
  -5   4  -2  614.57   12.19
  -6   3  -2  206.72   12.50
  -7   2  -2   39.74   11.39
  -8   1  -2  493.04   20.34
  -9   0  -2  513.08   20.13
 -10  -1  -2  126.25   19.89
   0  10  -2  185.66   31.96
  -1   9  -2  560.54   41.98
  -2   8  -2  433.45   32.01
  -3   7  -2    0.00   28.59
  -4   6  -2  383.39   29.72
  -5   5  -2  389.12   12.07
  -6   4  -2    1.66    7.09
  -7   3  -2  166.96   14.73
  -8   2  -2  554.54   19.52
  -9   1  -2  392.22   20.77
  -2   9  -2   16.37   31.41
  -3   8  -2  140.31   48.47
  -4   7  -2  452.58   35.49
  -5   6  -2  249.28   51.94
  -6   5  -2    7.95   23.47
  -7   4  -2  347.43   20.56
  -8   3  -2  332.92   17.49
   8  -3  -3  302.95   17.02
   7  -4  -3  422.81   37.75
   6  -5  -3  133.07   20.58
   5  -6  -3   67.24   32.25
   4  -7  -3  287.71   25.35
   2  -9  -3   12.68   54.64
   9  -1  -3  229.16   14.40
   8  -2  -3  449.49   18.30
   7  -3  -3  233.11   17.81
   6  -4  -3    3.01   17.35
   5  -5  -3  382.86   33.06
   4  -6  -3  490.57   24.43
   3  -7  -3   83.39   25.69
   2  -8  -3  203.10   28.98
   1  -9  -3  540.27   62.55
   0 -10  -3  250.40   48.04
  10   1  -3   26.80   18.43
   9   0  -3  532.50   18.99
   8  -1  -3  673.63   22.68
   7  -2  -3  132.47   11.58
   6  -3  -3  155.94    9.09
   5  -4  -3  731.99   32.47
   4  -5  -3  382.88   28.27
   3  -6  -3   72.38   22.35
   2  -7  -3  403.65   22.54
   1  -8  -3  478.43   60.45
   0  -9  -3   96.01   31.46
  -1 -10  -3  146.41   51.32
  -2 -11  -3  437.28   22.67
  10   2  -3  208.08   19.20
   9   1  -3  518.78   21.25
   8   0  -3  411.88   18.85
   7  -1  -3   17.12    9.95
   6  -2  -3  498.08   16.33
   5  -3  -3  553.96   10.65
   4  -4  -3  156.03   29.99
   3  -5  -3  388.19   23.51
   2  -6  -3  931.14   31.08
   1  -7  -3  403.05   27.73
   0  -8  -3    0.61   30.62
  -1  -9  -3  778.41   20.57
  -2 -10  -3  583.11   28.16
  -3 -11  -3   95.15   18.12
  10   3  -3  458.69   21.98
   9   2  -3  366.97   20.24
   8   1  -3  108.60    9.18
   7   0  -3  354.77   14.34
   6  -1  -3 1247.06   25.93
   5  -2  -3  357.65    8.62
   4  -3  -3   54.21    4.14
   3  -4  -3  746.98   29.92
   2  -5  -3 1064.65   29.84
   1  -6  -3   33.09    9.36
   0  -7  -3  272.67   10.27
  -1  -8  -3  911.17   20.32
  -2  -9  -3  462.29   18.45
  -3 -10  -3   21.88   16.77
  -4 -11  -3  231.41   16.50
  10   4  -3  539.91   24.69
   9   3  -3  176.59   16.20
   8   2  -3   92.83    9.25
   7   1  -3 1188.59   25.06
   6   0  -3 1053.49   25.66
   5  -1  -3  205.17    9.34
   4  -2  -3  295.57    6.92
   3  -3  -3  815.89   11.35
   2  -4  -3  589.84   21.39
   1  -5  -3   38.78    8.02
   0  -6  -3 1316.69   20.10
  -1  -7  -3 1298.64   25.72
  -2  -8  -3  162.44   10.27
  -3  -9  -3  216.34   11.96
  -4 -10  -3  512.31   20.93
  -5 -11  -3  201.97   18.73
  10   5  -3  320.45   22.39
   9   4  -3    0.00   11.37
   8   3  -3  592.07   18.69
   7   2  -3 1323.55   22.28
   6   1  -3  720.32   18.25
   5   0  -3   25.28    6.14
   4  -1  -3  828.27   12.00
   3  -2  -3  933.99   12.13
   2  -3  -3   89.42   21.93
   1  -4  -3 1830.24   43.59
   0  -5  -3 2622.59   27.99
  -1  -6  -3  619.56   13.36
  -2  -7  -3   38.15    7.20
  -3  -8  -3  744.90   18.85
  -4  -9  -3  620.84   24.27
  -5 -10  -3   44.28   16.19
  -6 -11  -3   98.35   21.05
  10   6  -3   21.05   21.79
   9   5  -3  200.53   15.89
   8   4  -3 1152.61   27.08
   7   3  -3  853.27   16.18
   6   2  -3  291.57   11.53
   5   1  -3  319.63    6.94
   4   0  -3 2930.28   33.60
   3  -1  -3  288.17    5.51
   2  -2  -3  679.87   19.40
   1  -3  -3 1957.18   22.97
   0  -4  -3 1874.38   18.58
  -1  -5  -3  181.16    4.94
  -2  -6  -3  362.53   11.27
  -3  -7  -3  930.68   17.15
  -4  -8  -3  813.47   21.68
  -5  -9  -3   18.46   16.07
  -6 -10  -3  407.65   20.80
  -7 -11  -3  254.05   21.97
  10   7  -3   40.33   14.31
   9   6  -3  675.12   27.79
   8   5  -3 1066.75   27.24
   7   4  -3  361.99   11.82
   6   3  -3  130.27    6.77
   5   2  -3 1430.48   22.08
   4   1  -3 1035.10   13.90
   3   0  -3  253.39    5.29
   2  -1  -3 1032.15   13.44
   1  -2  -3 1739.31   18.82
   0  -3  -3 1268.59   14.01
  -1  -4  -3   41.62    2.51
  -2  -5  -3 2719.12   43.85
  -3  -6  -3 2267.84   35.89
  -4  -7  -3   88.32    7.51
  -5  -8  -3  287.16   15.34
  -6  -9  -3  646.02   21.88
  -7 -10  -3  164.50   23.01
  -8 -11  -3   61.36   25.23
  10   8  -3   79.62   31.01
   9   7  -3  550.13   33.83
   8   6  -3  311.88   15.66
   7   5  -3    3.32   14.46
   6   4  -3  666.12   12.95
   5   3  -3 2950.23   45.57
   4   2  -3 1218.14   20.34
   3   1  -3  133.01    4.02
   2   0  -3 3556.88   35.26
   1  -1  -3   68.72    2.79
   0  -2  -3   78.96    3.25
  -1  -3  -3 4091.55   40.33
  -2  -4  -3 3451.64   35.38
  -3  -5  -3 1394.80   18.96
  -4  -6  -3    3.33    3.32
  -5  -7  -3  650.65   15.93
  -6  -8  -3  584.90   18.57
  -7  -9  -3   20.48   16.75
  -8 -10  -3  191.91   17.96
  10   9  -3  124.95   29.81
   9   8  -3  424.65   27.51
   8   7  -3    8.80   18.22
   7   6  -3  504.63   18.65
   6   5  -3 2549.58   37.94
   5   4  -3 1618.81   25.30
   4   3  -3   15.61    7.02
   3   2  -3  104.59    4.08
   2   1  -3 1797.43   20.18
   1   0  -3   56.74    3.00
   0  -1  -3  842.23   17.13
  -1  -2  -3 3059.69   28.35
  -2  -3  -3 5030.25   49.38
  -3  -4  -3  524.45    8.46
  -4  -5  -3  621.76   14.40
  -5  -6  -3  846.85   16.35
  -6  -7  -3  446.53   20.41
  -7  -8  -3   70.20   14.73
  -8  -9  -3  626.22   23.76
  -9 -10  -3  254.28   27.27
   9   9  -3  224.94   22.29
   8   8  -3   66.78   23.82
   7   7  -3  828.59   25.37
   6   6  -3 1192.32   21.95
   5   5  -3  524.82   12.45
   4   4  -3    0.00    6.79
   3   3  -3 1922.79   29.19
   2   2  -3 2062.10   27.98
   1   1  -3  865.57   14.81
   0   0  -3 5537.68   81.51
  -1  -1  -3 5165.50   46.47
  -2  -2  -3  225.84    4.15
  -3  -3  -3  182.49    7.44
  -4  -4  -3 2716.96   46.27
  -5  -5  -3 1291.55   21.47
  -6  -6  -3   48.90    6.82
  -7  -7  -3  340.06   15.74
  -8  -8  -3  625.92   24.43
  -9  -9  -3  166.14   18.16
   9  10  -3  111.67   31.00
   8   9  -3  163.08   22.71
   7   8  -3  962.15   28.09
   6   7  -3  490.23   18.37
   5   6  -3  107.58    7.78
   4   5  -3 1134.24   20.23
   3   4  -3 2551.56   42.61
   2   3  -3  346.69    7.69
   1   2  -3  497.11    7.18
   0   1  -3 2495.49   28.37
  -1   0  -3  425.42    5.96
  -2  -1  -3   42.45    3.16
  -3  -2  -3 2032.38   24.85
  -4  -3  -3 3054.69   39.63
  -5  -4  -3 1351.12   21.97
  -6  -5  -3    1.94    4.61
  -7  -6  -3  643.29   20.01
  -8  -7  -3  514.27   21.54
  -9  -8  -3    7.49   11.66
 -10  -9  -3  324.39   33.77
   8  10  -3  265.26   17.94
   7   9  -3  602.30   23.42
   6   8  -3   11.71   12.15
   5   7  -3  315.79   12.86
   4   6  -3 1906.75   29.04
   3   5  -3 1828.55   31.43
   2   4  -3   14.59    3.05
   1   3  -3  931.39   11.34
   0   2  -3 4352.67   44.31
  -1   1  -3    5.48    2.92
  -2   0  -3  740.86    8.70
  -3  -1  -3 2942.66   29.26
  -4  -2  -3 2577.29   38.05
  -5  -3  -3  728.88   13.10
  -6  -4  -3  678.08   14.67
  -7  -5  -3  585.39   18.42
  -8  -6  -3  138.89   19.29
  -9  -7  -3  188.70   27.56
 -10  -8  -3  620.16   39.38
   8  11  -3  339.81   22.47
   7  10  -3  300.34   24.97
   6   9  -3   21.74   11.89
   5   8  -3  912.63   25.34
   4   7  -3 1087.87   22.82
   3   6  -3  394.85   12.77
   2   5  -3  318.08    8.11
   1   4  -3 2058.01   25.00
   0   3  -3  828.99   12.85
  -1   2  -3   81.14    9.16
  -2   1  -3 3547.05   33.87
  -3   0  -3 5442.94   52.18
  -4  -1  -3  291.07    5.72
  -5  -2  -3  183.47    8.32
  -6  -3  -3 1689.90   23.50
  -7  -4  -3  692.03   14.81
  -8  -5  -3   15.99   14.99
  -9  -6  -3  301.67   24.96
 -10  -7  -3  545.99   27.51
   7  11  -3   47.63   15.76
   6  10  -3  157.22   20.07
   5   9  -3 1054.42   30.67
   4   8  -3  500.61   17.91
   3   7  -3  124.84   11.79
   2   6  -3  641.46   12.22
   1   5  -3 1531.05   21.21
   0   4  -3   18.79    2.76
  -1   3  -3  643.73   16.13
  -2   2  -3 3142.30   34.25
  -3   1  -3 1035.93   12.22
  -4   0  -3    4.11    2.25
  -5  -1  -3 1070.44   17.84
  -6  -2  -3 1475.76   22.85
  -7  -3  -3  605.67   14.09
  -8  -4  -3   18.66   15.81
  -9  -5  -3  591.84   21.87
 -10  -6  -3  274.16   31.94
 -11  -7  -3    0.00   29.94
   6  11  -3  519.33   27.75
   5  10  -3  630.31   22.81
   4   9  -3  130.59   18.09
   3   8  -3  289.14   14.03
   2   7  -3  706.59   21.55
   1   6  -3  680.49   14.30
   0   5  -3    2.11    2.63
  -1   4  -3 1032.50   16.62
  -2   3  -3 2517.54   25.22
  -3   2  -3  335.54    7.05
  -4   1  -3  632.88    9.80
  -5   0  -3 1745.15   26.51
  -6  -1  -3  955.82   18.49
  -7  -2  -3   42.72    5.51
  -8  -3  -3  497.29   18.77
  -9  -4  -3  460.46   16.98
 -10  -5  -3   25.10   18.48
 -11  -6  -3  138.71   23.64
   5  11  -3  342.86   19.69
   4  10  -3    0.00   16.11
   3   9  -3  496.05   19.55
   2   8  -3  802.90   25.62
   1   7  -3   81.27    8.13
   0   6  -3  361.37   10.36
  -1   5  -3 2020.75   32.37
  -2   4  -3  450.18   12.05
  -3   3  -3  235.28    8.86
  -4   2  -3 1536.75   21.19
  -5   1  -3 1463.22   21.57
  -6   0  -3   57.01    6.61
  -7  -1  -3   48.30    7.54
  -8  -2  -3  757.02   16.18
  -9  -3  -3  421.99   22.70
 -10  -4  -3   16.30   19.78
 -11  -5  -3  318.04   23.18
   4  11  -3  148.27   18.86
   3  10  -3  645.38   25.42
   2   9  -3  318.25   21.77
   1   8  -3   63.01    9.82
   0   7  -3  513.74   13.82
  -1   6  -3  703.63   15.94
  -2   5  -3   26.55   10.27
  -3   4  -3  543.28   14.24
  -4   3  -3 1413.43   21.25
  -5   2  -3 1049.97   17.06
  -6   1  -3   13.28    8.82
  -7   0  -3  457.01   17.35
  -8  -1  -3  587.31   16.22
  -9  -2  -3   35.53   18.78
 -10  -3  -3  137.13   16.88
 -11  -4  -3  448.51   29.36
   3  11  -3  562.36   23.95
   2  10  -3  132.91   18.33
   1   9  -3  187.74   14.60
   0   8  -3  470.61   18.54
  -1   7  -3  219.78   10.03
  -2   6  -3   40.12   10.48
  -3   5  -3  908.96   16.95
  -4   4  -3 1524.10   25.92
  -5   3  -3  148.42    7.33
  -6   2  -3  165.34   12.42
  -7   1  -3  639.89   19.63
  -8   0  -3  167.08   13.82
  -9  -1  -3    0.18   19.11
 -10  -2  -3  313.79   19.38
   2  11  -3    5.74    9.01
   1  10  -3  328.70   25.55
   0   9  -3  281.37   19.15
  -1   8  -3    2.82   11.86
  -2   7  -3  390.86   10.71
  -3   6  -3  870.88   18.02
  -4   5  -3  438.57   14.67
  -5   4  -3   64.81    5.47
  -6   3  -3  583.16   19.00
  -7   2  -3  595.74   17.29
  -8   1  -3   31.17   14.04
  -9   0  -3   64.89   12.60
 -10  -1  -3  335.09   21.77
   0  10  -3  120.15   18.26
  -1   9  -3   48.21   14.05
  -2   8  -3  313.68   28.39
  -3   7  -3  442.99   34.33
  -4   6  -3   79.39   25.16
  -5   5  -3  307.60   15.15
  -6   4  -3  628.59   23.37
  -7   3  -3  329.98   14.99
  -8   2  -3    5.91   12.17
  -9   1  -3  124.52   15.38
  -2   9  -3  354.01   39.92
  -3   8  -3   78.29   51.37
  -4   7  -3   65.90   28.61
  -5   6  -3  586.38   55.00
  -6   5  -3  552.28   19.22
  -7   4  -3   42.72   17.06
  -8   3  -3   57.60   13.68
   8  -3  -4   32.47   32.43
   7  -4  -4  370.24   34.94
   6  -5  -4  719.61   38.55
   5  -6  -4  523.57   35.61
   4  -7  -4    2.81   27.16
   2  -9  -4  311.81   64.27
   9  -1  -4   75.25   12.43
   8  -2  -4   80.83   13.20
   7  -3  -4  406.42   18.31
   6  -4  -4  520.91   38.67
   5  -5  -4   62.05   28.25
   4  -6  -4  121.26   20.22
   3  -7  -4  564.35   48.20
   2  -8  -4  349.15   33.05
   1  -9  -4   43.05   41.36
   0 -10  -4  293.34   52.01
  10   1  -4  172.71   22.84
   9   0  -4   26.54    8.85
   8  -1  -4  162.81   14.83
   7  -2  -4  314.84   13.16
   6  -3  -4  192.53   11.89
   5  -4  -4   91.87   19.33
   4  -5  -4 1051.44   41.68
   3  -6  -4 1090.07   39.46
   2  -7  -4  116.59   16.35
   1  -8  -4   95.03   41.61
   0  -9  -4  341.06   46.31
  -1 -10  -4  149.85   49.77
  -2 -11  -4   34.58   18.71
  10   2  -4  101.81   15.93
   9   1  -4   15.40   18.69
   8   0  -4  417.70   16.51
   7  -1  -4  458.25   16.93
   6  -2  -4   30.10   11.33
   5  -3  -4  971.55   15.50
   4  -4  -4 1362.77   43.72
   3  -5  -4  672.40   24.11
   2  -6  -4   14.49   21.95
   1  -7  -4  195.81   22.63
   0  -8  -4  438.22   50.18
  -1  -9  -4    7.93    8.75
  -2 -10  -4  242.57   13.03
  -3 -11  -4  548.28   27.27
  10   3  -4    7.72   14.45
   9   2  -4  149.07   20.14
   8   1  -4  432.03   14.54
   7   0  -4  119.36   13.34
   6  -1  -4  170.34   10.90
   5  -2  -4  973.91   16.06
   4  -3  -4  943.63   14.60
   3  -4  -4  205.08   19.89
   2  -5  -4  239.27   22.85
   1  -6  -4  854.35   25.73
   0  -7  -4  344.60   10.07
  -1  -8  -4  125.22    7.26
  -2  -9  -4  738.20   22.23
  -3 -10  -4  437.60   17.62
  -4 -11  -4   27.68   15.14
  10   4  -4   45.42   17.93
   9   3  -4  316.88   21.31
   8   2  -4  291.46   13.15
   7   1  -4    0.00   12.35
   6   0  -4  739.81   16.13
   5  -1  -4 1229.31   22.23
   4  -2  -4  335.05    7.64
   3  -3  -4  135.73    8.44
   2  -4  -4 1804.85   44.73
   1  -5  -4 1505.01   34.55
   0  -6  -4   72.51    4.44
  -1  -7  -4  220.37    7.97
  -2  -8  -4  689.46   22.64
  -3  -9  -4  228.85   12.51
  -4 -10  -4   48.93   16.50
  -5 -11  -4  349.44   19.46
  10   5  -4  238.36   22.94
   9   4  -4  651.04   19.98
   8   3  -4   96.03   13.71
   7   2  -4  288.17   10.31
   6   1  -4  974.65   17.26
   5   0  -4 1062.09   18.79
   4  -1  -4    5.60    3.03
   3  -2  -4 1085.09   15.89
   2  -3  -4 1565.88   17.85
   1  -4  -4 1411.17   16.06
   0  -5  -4   31.69    2.35
  -1  -6  -4  763.06   16.72
  -2  -7  -4  550.97   15.78
  -3  -8  -4   14.25    5.97
  -4  -9  -4  552.95   22.52
  -5 -10  -4  728.73   22.77
  -6 -11  -4  343.69   24.43
  10   6  -4  630.58   30.47
   9   5  -4  514.06   18.33
   8   4  -4    0.00   12.83
   7   3  -4  430.90   11.61
   6   2  -4  666.23   15.14
   5   1  -4  347.65   11.79
   4   0  -4  102.37    4.95
   3  -1  -4 2312.49   26.30
   2  -2  -4 1995.71   23.13
   1  -3  -4   73.56   10.43
   0  -4  -4  999.18   11.48
  -1  -5  -4 1241.33   14.72
  -2  -6  -4  327.89    9.76
  -3  -7  -4  256.63   10.11
  -4  -8  -4  909.52   22.43
  -5  -9  -4  840.56   25.28
  -6 -10  -4   40.69   18.61
  -7 -11  -4  132.40   14.94
  10   7  -4  476.08   30.45
   9   6  -4  287.69   20.24
   8   5  -4   57.62   14.59
   7   4  -4  791.54   17.43
   6   3  -4  776.59   14.68
   5   2  -4    0.00    7.62
   4   1  -4 2508.10   28.81
   3   0  -4 3447.05   38.64
   2  -1  -4  222.74    5.12
   1  -2  -4  239.48   11.70
   0  -3  -4 2021.96   20.78
  -1  -4  -4 1305.85   14.55
  -2  -5  -4   84.36    5.97
  -3  -6  -4  591.23   13.40
  -4  -7  -4 1349.68   23.63
  -5  -8  -4  460.59   17.30
  -6  -9  -4   99.39   15.98
  -7 -10  -4  378.70   24.63
  -8 -11  -4  501.58   30.86
  10   8  -4  253.26   34.34
   9   7  -4   13.31   24.39
   8   6  -4  619.73   22.76
   7   5  -4 1025.42   28.52
   6   4  -4   58.95    5.22
   5   3  -4  928.97   16.73
   4   2  -4 1252.42   19.43
   3   1  -4 2728.76   30.33
   2   0  -4  320.58    5.55
   1  -1  -4  714.26   16.52
   0  -2  -4  972.78   13.17
  -1  -3  -4 1334.96   14.63
  -2  -4  -4  451.89    7.00
  -3  -5  -4 2060.69   28.31
  -4  -6  -4  771.45   16.44
  -5  -7  -4    3.19    5.37
  -6  -8  -4  595.45   18.45
  -7  -9  -4  844.16   23.58
  -8 -10  -4  169.88   19.59
   9   8  -4   81.12   18.85
   8   7  -4  613.38   31.98
   7   6  -4  606.11   17.59
   6   5  -4    4.57    4.91
   5   4  -4 1811.25   27.98
   4   3  -4 2398.14   39.09
   3   2  -4  323.25    7.81
   2   1  -4   68.07    3.86
   1   0  -4 2614.94   35.71
   0  -1  -4 1055.87   13.06
  -1  -2  -4    3.31    1.87
  -2  -3  -4 1105.90   12.84
  -3  -4  -4 1882.54   28.71
  -4  -5  -4  349.00   13.37
  -5  -6  -4  346.43   12.12
  -6  -7  -4  891.46   23.57
  -7  -8  -4  702.64   21.99
  -8  -9  -4   90.10   21.13
  -9 -10  -4  125.74   25.89
   9   9  -4  251.26   22.95
   8   8  -4  539.23   30.01
   7   7  -4   87.21   11.53
   6   6  -4  711.49   17.42
   5   5  -4 1661.08   26.65
   4   4  -4  873.53   25.50
   3   3  -4    0.00   11.49
   2   2  -4 2493.55   33.61
   1   1  -4 5806.88   73.14
   0   0  -4 2273.55   38.96
  -1  -1  -4  397.86    5.34
  -2  -2  -4 1880.06   20.79
  -3  -3  -4 1032.66   21.58
  -4  -4  -4   12.63    6.10
  -5  -5  -4  709.75   14.66
  -6  -6  -4 1459.96   26.65
  -7  -7  -4  472.85   19.17
  -8  -8  -4   40.36   19.06
  -9  -9  -4  350.28   23.37
   9  10  -4  410.27   33.77
   8   9  -4  278.21   23.05
   7   8  -4   22.46   14.76
   6   7  -4  686.29   26.91
   5   6  -4 1097.64   20.24
   4   5  -4  130.55    9.05
   3   4  -4 1155.62   19.52
   2   3  -4 2858.50   38.43
   1   2  -4 4380.71   51.42
   0   1  -4  384.09   11.81
  -1   0  -4 1410.07   30.30
  -2  -1  -4  953.46   12.99
  -3  -2  -4  221.06    5.80
  -4  -3  -4  527.47    9.85
  -5  -4  -4 2637.54   37.80
  -6  -5  -4  660.52   14.95
  -7  -6  -4   25.44   14.44
  -8  -7  -4  410.21   20.68
  -9  -8  -4  447.62   27.37
 -10  -9  -4  141.50   29.77
   8  10  -4  167.01   16.08
   7   9  -4   77.87   18.22
   6   8  -4  669.14   24.40
   5   7  -4  244.91   12.18
   4   6  -4   78.82    6.44
   3   5  -4 2759.37   39.78
   2   4  -4 2908.42   39.88
   1   3  -4  646.65    9.37
   0   2  -4  229.87    7.26
  -1   1  -4 1828.13   23.35
  -2   0  -4 1500.18   17.21
  -3  -1  -4  291.13    5.84
  -4  -2  -4  856.12   15.82
  -5  -3  -4 2203.06   35.57
  -6  -4  -4  683.61   12.53
  -7  -5  -4  157.21   14.77
  -8  -6  -4  592.45   23.84
  -9  -7  -4  464.37   31.29
 -10  -8  -4   19.19   29.73
   7  10  -4  167.82   24.93
   6   9  -4  505.82   18.74
   5   8  -4   28.57   13.46
   4   7  -4 1041.61   23.44
   3   6  -4 2656.78   42.23
   2   5  -4 1273.60   26.27
   1   4  -4  178.61    5.15
   0   3  -4 1581.41   21.01
  -1   2  -4 2147.25   23.89
  -2   1  -4  506.95    8.01
  -3   0  -4  320.20    5.59
  -4  -1  -4 2639.74   30.36
  -5  -2  -4 1085.32   19.32
  -6  -3  -4    1.50    3.75
  -7  -4  -4  897.25   16.49
  -8  -5  -4  810.29   23.08
  -9  -6  -4  270.55   26.96
 -10  -7  -4   43.90   14.21
   7  11  -4  349.66   31.90
   6  10  -4  223.96   19.70
   5   9  -4    0.00   16.20
   4   8  -4  934.49   25.09
   3   7  -4  903.32   23.63
   2   6  -4  175.73    9.54
   1   5  -4  874.96   13.67
   0   4  -4 1802.09   23.21
  -1   3  -4 2255.39   27.06
  -2   2  -4   76.10    9.98
  -3   1  -4 2008.07   21.60
  -4   0  -4 1093.06   13.83
  -5  -1  -4   18.43    4.99
  -6  -2  -4  779.31   15.38
  -7  -3  -4 1463.09   24.56
  -8  -4  -4  614.11   22.64
  -9  -5  -4   76.19   17.47
 -10  -6  -4  142.02   30.77
 -11  -7  -4  275.66   34.78
   6  11  -4  107.83   21.71
   5  10  -4  114.26   17.06
   4   9  -4  713.60   29.54
   3   8  -4  204.01   13.53
   2   7  -4  243.02   12.90
   1   6  -4 1796.85   24.02
   0   5  -4 2295.51   28.24
  -1   4  -4  297.08   11.76
  -2   3  -4  128.94    9.01
  -3   2  -4 1188.49   14.97
  -4   1  -4  605.40    9.12
  -5   0  -4  217.92    7.01
  -6  -1  -4 1165.66   21.67
  -7  -2  -4 1616.68   24.55
  -8  -3  -4  570.83   22.12
  -9  -4  -4   77.11   15.09
 -10  -5  -4  386.90   21.54
 -11  -6  -4  119.09   28.47
   5  11  -4  278.87   20.84
   4  10  -4  322.67   21.10
   3   9  -4   21.06    8.67
   2   8  -4  763.41   22.42
   1   7  -4 1773.16   32.61
   0   6  -4 1038.79   21.93
  -1   5  -4    8.05   13.88
  -2   4  -4 1214.59   25.91
  -3   3  -4  984.37   13.86
  -4   2  -4  124.25    4.77
  -5   1  -4  773.40   15.28
  -6   0  -4 1414.88   25.38
  -7  -1  -4  588.87   16.71
  -8  -2  -4    0.00    6.75
  -9  -3  -4  371.13   17.46
 -10  -4  -4  454.08   24.53
 -11  -5  -4   54.69   15.13
   4  11  -4  162.75   18.51
   3  10  -4   22.49   18.52
   2   9  -4  710.78   24.13
   1   8  -4  863.10   23.73
   0   7  -4   76.55   12.88
  -1   6  -4  548.66   13.79
  -2   5  -4 1124.32   19.65
  -3   4  -4  372.28   10.66
  -4   3  -4   15.16    6.06
  -5   2  -4  761.71   16.74
  -6   1  -4  771.79   22.56
  -7   0  -4   34.05   12.15
  -8  -1  -4  282.27   15.31
  -9  -2  -4  786.60   26.99
 -10  -3  -4  361.92   21.62
 -11  -4  -4    0.00   19.01
   3  11  -4  129.40   20.58
   2  10  -4  604.74   29.82
   1   9  -4  179.07   18.12
   0   8  -4  114.35   14.87
  -1   7  -4  986.97   18.52
  -2   6  -4  811.51   16.31
  -3   5  -4  145.21   10.08
  -4   4  -4  179.56   16.26
  -5   3  -4  769.98   16.89
  -6   2  -4  503.88   17.60
  -7   1  -4  190.43   12.19
  -8   0  -4  876.95   29.48
  -9  -1  -4  625.20   26.72
 -10  -2  -4  151.35   19.68
   2  11  -4  361.96   22.42
   1  10  -4   34.38   19.42
   0   9  -4  375.10   15.35
  -1   8  -4  810.95   23.88
  -2   7  -4  297.16   11.05
  -3   6  -4    0.00   11.71
  -4   5  -4  592.36   18.04
  -5   4  -4  428.33   16.38
  -6   3  -4    0.00   13.20
  -7   2  -4  442.65   15.04
  -8   1  -4  717.32   27.85
  -9   0  -4  199.21   19.18
 -10  -1  -4    0.00   18.92
   0  10  -4  439.69   22.02
  -1   9  -4  375.19   23.46
  -2   8  -4   26.24    6.68
  -3   7  -4  141.00   13.75
  -4   6  -4  421.40   12.82
  -5   5  -4  120.35   17.10
  -6   4  -4   79.46    8.98
  -7   3  -4  548.16   20.81
  -8   2  -4  421.63   21.46
  -9   1  -4   15.56   20.44
  -2   9  -4   33.54   34.87
  -3   8  -4  479.20   59.59
  -4   7  -4  318.19   31.68
  -5   6  -4    0.00   14.88
  -6   5  -4  235.53   15.36
  -7   4  -4  450.04   27.55
  -8   3  -4  194.48   15.85
   7  -4  -5  216.48   33.08
   6  -5  -5    0.00   19.03
   5  -6  -5  309.91   35.55
   4  -7  -5  179.23   36.15
   2  -9  -5  258.06   60.16
   9  -1  -5  420.52   20.74
   8  -2  -5  362.16   20.87
   7  -3  -5   41.28   16.37
   6  -4  -5  149.88   32.44
   5  -5  -5  527.50   38.76
   4  -6  -5   65.52   19.82
   3  -7  -5  140.71   41.62
   2  -8  -5  593.60   68.69
   1  -9  -5  450.85   60.08
   0 -10  -5   42.86   50.40
   9   0  -5  706.79   23.59
   8  -1  -5  272.44   17.94
   7  -2  -5    0.00   12.22
   6  -3  -5  487.37   16.27
   5  -4  -5  348.11   26.58
   4  -5  -5   32.22   20.82
   3  -6  -5  268.37   39.49
   2  -7  -5  731.76   33.18
   1  -8  -5  347.42   58.02
   0  -9  -5   20.37   37.12
  -1 -10  -5  356.56   56.98
  -2 -11  -5  290.97   19.35
  10   2  -5  454.44   23.33
   9   1  -5  585.76   27.36
   8   0  -5   40.79   11.67
   7  -1  -5  171.86   13.73
   6  -2  -5  878.98   19.77
   5  -3  -5  176.70    7.03
   4  -4  -5  189.45   14.49
   3  -5  -5 1016.61   36.46
   2  -6  -5  475.96   34.10
   1  -7  -5   60.90   30.08
   0  -8  -5  452.55   48.43
  -1  -9  -5  689.79   17.97
  -2 -10  -5  237.26   21.86
  -3 -11  -5   24.25   21.32
  10   3  -5  439.43   23.46
   9   2  -5  109.56   19.76
   8   1  -5   79.32    9.03
   7   0  -5 1002.87   22.69
   6  -1  -5  623.43   17.65
   5  -2  -5   36.41    4.55
   4  -3  -5  524.20   11.17
   3  -4  -5 1064.42   29.51
   2  -5  -5  232.64   23.58
   1  -6  -5   40.07   10.24
   0  -7  -5  605.76   11.97
  -1  -8  -5  943.89   20.58
  -2  -9  -5  106.56   16.16
  -3 -10  -5  162.17   14.67
  -4 -11  -5  269.98   17.88
  10   4  -5  306.33   23.64
   9   3  -5   21.86   15.70
   8   2  -5  638.52   20.86
   7   1  -5 1191.92   24.28
   6   0  -5  470.63   16.30
   5  -1  -5   16.88   13.73
   4  -2  -5  974.28   15.18
   3  -3  -5  764.66   14.98
   2  -4  -5   45.05    3.71
   1  -5  -5 1024.13   15.84
   0  -6  -5 1861.58   26.85
  -1  -7  -5  375.04   17.23
  -2  -8  -5   25.48   13.78
  -3  -9  -5  587.23   17.53
  -4 -10  -5  226.67   17.32
  -5 -11  -5    7.72   15.57
  10   5  -5   88.94   22.18
   9   4  -5  137.91   14.71
   8   3  -5  974.64   25.60
   7   2  -5  994.43   18.54
   6   1  -5    0.00   13.45
   5   0  -5  362.60   12.38
   4  -1  -5 1249.26   16.52
   3  -2  -5   32.49    3.93
   2  -3  -5 1130.98   17.58
   1  -4  -5 2891.52   41.21
   0  -5  -5 1273.45   15.88
  -1  -6  -5  112.53   11.87
  -2  -7  -5  305.37   11.27
  -3  -8  -5  782.40   19.74
  -4  -9  -5  221.84   17.49
  -5 -10  -5   83.94   16.44
  -6 -11  -5  379.39   25.89
  10   6  -5    0.00   21.92
   9   5  -5  439.34   20.83
   8   4  -5  939.07   29.04
   7   3  -5  141.47    9.75
   6   2  -5  213.60   16.31
   5   1  -5 1210.08   17.93
   4   0  -5  838.75   12.57
   3  -1  -5  148.57    5.25
   2  -2  -5 1102.47   22.95
   1  -3  -5 3451.52   47.91
   0  -4  -5  605.38    8.94
  -1  -5  -5   54.03    3.72
  -2  -6  -5  889.67   13.05
  -3  -7  -5  927.24   26.89
  -4  -8  -5   57.03    8.08
  -5  -9  -5  419.74   23.89
  -6 -10  -5  373.19   21.34
  -7 -11  -5  104.31   16.72
  10   7  -5  197.64   23.48
   9   6  -5  626.20   27.42
   8   5  -5  814.72   26.93
   7   4  -5    5.96    6.51
   6   3  -5  789.09   15.93
   5   2  -5 1725.15   24.30
   4   1  -5 1058.93   19.24
   3   0  -5  537.95    8.21
   2  -1  -5 2749.99   36.50
   1  -2  -5  518.99   13.62
   0  -3  -5   47.84    2.83
  -1  -4  -5 1625.93   17.84
  -2  -5  -5 2697.61   34.90
  -3  -6  -5  449.13   18.31
  -4  -7  -5   43.51    5.86
  -5  -8  -5  814.80   23.82
  -6  -9  -5  289.27   16.46
  -7 -10  -5   51.00   21.48
  -8 -11  -5  228.80   27.17
  10   8  -5  284.53   35.27
   9   7  -5  610.58   36.44
   8   6  -5  275.74   18.31
   7   5  -5  122.32   15.42
   6   4  -5 1601.61   26.58
   5   3  -5 1162.89   28.61
   4   2  -5  229.80   18.26
   3   1  -5 1047.55   13.61
   2   0  -5 1914.11   22.65
   1  -1  -5   48.40    3.72
   0  -2  -5 1655.33   25.11
  -1  -3  -5 4177.96   41.57
  -2  -4  -5 2475.17   31.44
  -3  -5  -5  243.28   14.83
  -4  -6  -5  348.22   10.66
  -5  -7  -5  645.61   16.16
  -6  -8  -5   98.79   11.51
  -7  -9  -5  108.63   20.59
  -8 -10  -5  589.33   26.78
   9   8  -5  204.38   25.23
   8   7  -5    0.00   18.10
   7   6  -5  746.48   23.68
   6   5  -5 1239.30   22.72
   5   4  -5  234.73    9.02
   4   3  -5  479.55   19.94
   3   2  -5 1519.80   22.71
   2   1  -5 1767.22   24.93
   1   0  -5   70.43    5.32
   0  -1  -5 1506.75   25.72
  -1  -2  -5 5422.60   49.78
  -2  -3  -5 1379.39   14.55
  -3  -4  -5  162.40    8.79
  -4  -5  -5 1050.90   16.22
  -5  -6  -5  665.15   15.54
  -6  -7  -5   38.66   13.34
  -7  -8  -5  649.20   23.39
  -8  -9  -5  466.37   23.06
  -9 -10  -5   83.54   26.38
   9   9  -5   24.05   16.81
   8   8  -5  299.29   26.20
   7   7  -5 1122.03   32.48
   6   6  -5 1478.14   27.26
   5   5  -5   19.71    4.96
   4   4  -5 1287.69   25.51
   3   3  -5 1204.92   21.65
   2   2  -5  197.93    6.44
   1   1  -5 1585.94   22.60
   0   0  -5 5359.62   89.22
  -1  -1  -5 1165.46   20.36
  -2  -2  -5  244.02    4.95
  -3  -3  -5 1604.79   21.41
  -4  -4  -5 2323.95   32.89
  -5  -5  -5   94.77    6.07
  -6  -6  -5   18.27    9.28
  -7  -7  -5  743.85   24.56
  -8  -8  -5  435.50   22.31
  -9  -9  -5   21.12   16.57
   8   9  -5  598.76   35.30
   7   8  -5  731.88   25.30
   6   7  -5  259.57   17.78
   5   6  -5   94.37    7.41
   4   5  -5 1320.74   23.23
   3   4  -5  864.80   20.17
   2   3  -5  652.53   11.90
   1   2  -5 3127.46   37.90
   0   1  -5 2973.97   45.22
  -1   0  -5   95.58    5.98
  -2  -1  -5 2611.98   31.16
  -3  -2  -5 1756.14   22.50
  -4  -3  -5 2332.56   37.77
  -5  -4  -5  126.88    6.61
  -6  -5  -5  476.30   13.03
  -7  -6  -5  756.48   23.88
  -8  -7  -5   16.13   14.60
  -9  -8  -5  218.08   30.96
 -10  -9  -5  515.59   37.26
   8  10  -5  453.09   28.42
   7   9  -5  304.39   22.06
   6   8  -5    0.00   12.65
   5   7  -5  676.34   20.06
   4   6  -5 1483.95   29.04
   3   5  -5  343.34   14.92
   2   4  -5  628.38   19.77
   1   3  -5 2072.66   24.19
   0   2  -5 1682.34   24.23
  -1   1  -5  132.53    4.50
  -2   0  -5 1777.41   23.25
  -3  -1  -5 3798.66   40.49
  -4  -2  -5  410.75   13.56
  -5  -3  -5  333.77   12.99
  -6  -4  -5 1077.17   16.84
  -7  -5  -5  313.71   14.78
  -8  -6  -5   24.47   15.77
  -9  -7  -5  519.95   34.43
 -10  -8  -5  455.84   37.51
   7  10  -5    4.35   21.32
   6   9  -5  231.02   14.43
   5   8  -5 1263.53   30.10
   4   7  -5 1163.70   26.45
   3   6  -5    0.00   14.30
   2   5  -5 1876.74   23.13
   1   4  -5  809.02   11.02
   0   3  -5   10.22    4.32
  -1   2  -5 1765.24   21.38
  -2   1  -5 2955.14   38.61
  -3   0  -5 1131.93   14.40
  -4  -1  -5   63.60    6.39
  -5  -2  -5  766.87   11.78
  -6  -3  -5 1624.62   20.80
  -7  -4  -5   45.13    9.08
  -8  -5  -5  233.08   20.06
  -9  -6  -5  655.21   34.54
 -10  -7  -5  404.94   29.20
   7  11  -5   60.15   27.36
   6  10  -5  483.44   25.13
   5   9  -5  830.75   29.15
   4   8  -5  111.16   11.11
   3   7  -5  287.25   17.10
   2   6  -5 1170.61   19.64
   1   5  -5  493.92   11.95
   0   4  -5  617.11   11.55
  -1   3  -5 1444.03   30.50
  -2   2  -5 2766.77   32.74
  -3   1  -5  692.36    9.92
  -4   0  -5  711.71   10.64
  -5  -1  -5 1185.52   16.88
  -6  -2  -5  449.30   13.25
  -7  -3  -5   22.42    7.04
  -8  -4  -5  715.81   27.62
  -9  -5  -5  531.23   22.11
 -10  -6  -5   39.06   28.90
   6  11  -5  562.19   30.15
   5  10  -5  291.86   19.34
   4   9  -5    9.58   16.06
   3   8  -5  699.90   21.33
   2   7  -5 1003.97   21.95
   1   6  -5  275.95   12.04
   0   5  -5  768.22   14.19
  -1   4  -5 2574.43   40.70
  -2   3  -5 1259.42   18.70
  -3   2  -5   44.46    4.68
  -4   1  -5 1332.03   16.12
  -5   0  -5 1061.10   20.95
  -6  -1  -5   21.44   10.43
  -7  -2  -5  351.63   13.72
  -8  -3  -5  658.36   24.88
  -9  -4  -5  302.80   16.02
 -10  -5  -5    9.96   20.94
 -11  -6  -5  302.64   23.44
   5  11  -5   31.34   16.63
   4  10  -5  212.21   19.62
   3   9  -5  566.61   22.20
   2   8  -5  352.17   20.91
   1   7  -5  114.13   14.33
   0   6  -5 1409.09   26.21
  -1   5  -5 1103.53   25.45
  -2   4  -5    0.00    5.06
  -3   3  -5  702.22   13.71
  -4   2  -5 1547.16   19.51
  -5   1  -5  819.78   19.37
  -6   0  -5   38.66    9.13
  -7  -1  -5  453.10   16.86
  -8  -2  -5  747.34   19.52
  -9  -3  -5    0.00   13.52
 -10  -4  -5  294.38   24.29
 -11  -5  -5  497.07   30.68
   4  11  -5  309.14   21.66
   3  10  -5  408.55   23.49
   2   9  -5   73.44   19.50
   1   8  -5  345.75   15.51
   0   7  -5 1098.01   23.92
  -1   6  -5  346.05   10.14
  -2   5  -5  267.53   11.13
  -3   4  -5 1370.04   25.58
  -4   3  -5 1197.14   29.00
  -5   2  -5  448.66   16.08
  -6   1  -5  235.60   12.07
  -7   0  -5  495.68   16.87
  -8  -1  -5  152.67   13.99
  -9  -2  -5   95.55   19.93
 -10  -3  -5  392.97   23.01
   3  11  -5  303.75   22.51
   2  10  -5   29.13   11.97
   1   9  -5  440.03   17.64
   0   8  -5  512.03   18.77
  -1   7  -5    0.00   14.33
  -2   6  -5  738.32   21.33
  -3   5  -5 1431.55   26.70
  -4   4  -5  556.49   19.40
  -5   3  -5    1.34    7.87
  -6   2  -5  469.16   18.55
  -7   1  -5  531.38   21.42
  -8   0  -5    0.00   11.21
  -9  -1  -5  291.80   24.52
 -10  -2  -5  416.01   22.40
   1  10  -5  365.08   22.30
   0   9  -5   61.56   13.87
  -1   8  -5  134.28   17.58
  -2   7  -5  941.19   28.14
  -3   6  -5  774.95   20.92
  -4   5  -5   39.83   11.31
  -5   4  -5  310.59   18.44
  -6   3  -5  668.49   22.83
  -7   2  -5  247.61   13.76
  -8   1  -5   37.07   18.06
  -9   0  -5  365.53   21.18
 -10  -1  -5  278.65   21.81
   0  10  -5   12.72   18.51
  -1   9  -5  237.60   21.26
  -2   8  -5  642.99   26.66
  -3   7  -5  234.91   19.47
  -4   6  -5  102.23   12.79
  -5   5  -5  621.42   29.77
  -6   4  -5  470.76   19.65
  -7   3  -5   72.19   15.64
  -8   2  -5  120.71   16.87
  -9   1  -5  269.22   23.81
  -3   8  -5   38.07   47.68
  -4   7  -5  456.45   19.43
  -5   6  -5  711.96   28.18
  -6   5  -5  210.50   18.08
  -7   4  -5    0.00   20.50
  -8   3  -5  157.33   20.48
   7  -4  -6  528.22   31.71
   6  -5  -6  354.50   33.77
   5  -6  -6    0.00   37.26
   4  -7  -6  182.23   36.20
   3  -8  -6  390.51   54.73
   8  -2  -6  204.00   19.95
   7  -3  -6  474.96   19.83
   6  -4  -6  279.44   33.63
   5  -5  -6   70.55   27.55
   4  -6  -6  380.91   29.17
   3  -7  -6  392.36   47.67
   2  -8  -6    0.00   20.40
   1  -9  -6  242.25   50.39
   0 -10  -6  320.34   51.73
   9   0  -6   59.32   11.91
   8  -1  -6  478.82   20.22
   7  -2  -6  542.91   15.80
   6  -3  -6   68.30   13.86
   5  -4  -6  448.01   27.95
   4  -5  -6  820.74   38.92
   3  -6  -6   94.81   33.38
   2  -7  -6   78.75   31.50
   1  -8  -6  441.48   55.82
   0  -9  -6  310.17   43.60
  -1 -10  -6   10.03   49.49
  10   2  -6    0.00   15.68
   9   1  -6  244.02   21.62
   8   0  -6  561.43   21.59
   7  -1  -6  131.09   12.23
   6  -2  -6  182.60   16.32
   5  -3  -6  843.64   15.29
   4  -4  -6  954.94   28.59
   3  -5  -6   33.03   17.01
   2  -6  -6  294.88   29.56
   1  -7  -6  502.30   34.04
   0  -8  -6  252.65   44.71
  -1  -9  -6   96.06   11.11
  -2 -10  -6  592.59   25.54
  -3 -11  -6  331.88   24.08
  10   3  -6   51.82   15.93
   9   2  -6  422.03   22.78
   8   1  -6  356.28   16.35
   7   0  -6    0.00   12.97
   6  -1  -6  810.27   21.35
   5  -2  -6 1626.26   24.27
   4  -3  -6  541.93   12.34
   3  -4  -6   39.27    4.55
   2  -5  -6  639.68   15.49
   1  -6  -6  254.88   10.30
   0  -7  -6   35.55    9.60
  -1  -8  -6  460.27   11.94
  -2  -9  -6  709.64   21.04
  -3 -10  -6  155.20   17.07
  -4 -11  -6    8.28   14.55
  10   4  -6  142.56   19.44
   9   3  -6  394.60   22.30
   8   2  -6  120.42   12.15
   7   1  -6  425.72   17.22
   6   0  -6 1396.54   26.70
   5  -1  -6  937.08   19.98
   4  -2  -6   66.16    4.95
   3  -3  -6  621.31   12.23
   2  -4  -6 1145.77   23.28
   1  -5  -6  223.00    6.17
   0  -6  -6  188.01    7.09
  -1  -7  -6 1070.49   19.11
  -2  -8  -6  799.83   22.61
  -3  -9  -6    5.35    6.42
  -4 -10  -6  261.56   19.06
  -5 -11  -6  364.17   20.56
  10   5  -6  307.42   24.50
   9   4  -6  144.46   17.83
   8   3  -6   46.74   15.04
   7   2  -6  930.11   22.01
   6   1  -6 1546.13   24.21
   5   0  -6  528.10   13.78
   4  -1  -6  247.57    7.78
   3  -2  -6 1666.09   26.63
   2  -3  -6 2095.21   32.91
   1  -4  -6    0.00    5.78
   0  -5  -6  908.36   12.56
  -1  -6  -6  638.23   11.85
  -2  -7  -6  131.61   12.44
  -3  -8  -6  158.15   10.78
  -4  -9  -6  993.31   30.41
  -5 -10  -6  377.68   18.14
  -6 -11  -6   23.57   19.94
  10   6  -6  205.73   26.20
   9   5  -6   94.50   18.86
   8   4  -6  116.99   16.02
   7   3  -6 1056.57   24.18
   6   2  -6  685.32   15.41
   5   1  -6   59.74   10.78
   4   0  -6 1603.13   21.65
   3  -1  -6 2686.37   34.30
   2  -2  -6  581.42   11.97
   1  -3  -6  173.24    5.55
   0  -4  -6 1126.55   14.62
  -1  -5  -6  462.12    8.61
  -2  -6  -6  136.14    8.64
  -3  -7  -6  871.21   23.89
  -4  -8  -6 1264.71   29.12
  -5  -9  -6  350.57   18.36
  -6 -10  -6   33.31   17.14
  -7 -11  -6  178.82   21.27
  10   7  -6  267.25   34.71
   9   6  -6   16.12   22.37
   8   5  -6  266.70   16.77
   7   4  -6  577.20   19.56
   6   3  -6   48.86    7.23
   5   2  -6  996.24   24.63
   4   1  -6 3428.40   40.12
   3   0  -6 2340.61   26.02
   2  -1  -6   62.95    5.77
   1  -2  -6 1463.29   23.04
   0  -3  -6 1722.04   21.64
  -1  -4  -6  181.53    4.82
  -2  -5  -6  252.96   12.73
  -3  -6  -6 1546.33   22.62
  -4  -7  -6 1111.72   20.99
  -5  -8  -6   29.70   14.77
  -6  -9  -6  344.11   19.57
  -7 -10  -6  416.93   25.75
  10   8  -6   41.04   15.33
   9   7  -6   45.89   25.55
   8   6  -6  313.11   22.58
   7   5  -6  206.75   22.36
   6   4  -6   97.35    8.38
   5   3  -6 2384.16   38.55
   4   2  -6 3863.15   52.50
   3   1  -6 1074.45   15.57
   2   0  -6  547.22    9.48
   1  -1  -6 1526.74   23.02
   0  -2  -6 1845.87   29.68
  -1  -3  -6    1.04    2.01
  -2  -4  -6 2242.80   24.36
  -3  -5  -6 1217.07   16.43
  -4  -6  -6  118.21    7.07
  -5  -7  -6  321.88   12.37
  -6  -8  -6  816.35   22.87
  -7  -9  -6  307.77   21.28
  -8 -10  -6    8.96   11.78
   9   8  -6  248.46   26.08
   8   7  -6  402.99   28.10
   7   6  -6  153.56   23.21
   6   5  -6  250.00   10.90
   5   4  -6 1984.15   30.75
   4   3  -6  681.30   15.85
   3   2  -6   17.45    3.80
   2   1  -6 2080.15   29.24
   1   0  -6 3507.16   47.95
   0  -1  -6  202.46    8.19
  -1  -2  -6 1052.61   11.91
  -2  -3  -6 2501.70   24.60
  -3  -4  -6 1104.72   16.71
  -4  -5  -6   24.77   10.81
  -5  -6  -6  559.33   12.63
  -6  -7  -6 1328.66   29.68
  -7  -8  -6  373.72   16.39
  -8  -9  -6   38.73   19.13
  -9 -10  -6  250.06   27.69
   9   9  -6  491.45   31.21
   8   8  -6  184.42   27.37
   7   7  -6   30.43   14.97
   6   6  -6  504.49   16.51
   5   5  -6  867.67   17.62
   4   4  -6   38.20    9.46
   3   3  -6 1364.82   29.95
   2   2  -6 4126.63   54.43
   1   1  -6 2784.82   43.60
   0   0  -6  223.88    7.35
  -1  -1  -6 3919.66   55.43
  -2  -2  -6 2626.95   27.34
  -3  -3  -6  458.02   13.02
  -4  -4  -6  963.95   20.21
  -5  -5  -6 1701.11   24.05
  -6  -6  -6  769.67   22.99
  -7  -7  -6   12.35   11.01
  -8  -8  -6  231.20   22.05
  -9  -9  -6  306.37   29.14
   8   9  -6    5.72   27.61
   7   8  -6  211.69   16.60
   6   7  -6  765.37   26.74
   5   6  -6  413.14   14.51
   4   5  -6   47.46   11.56
   3   4  -6 2146.37   36.91
   2   3  -6 4158.58   50.28
   1   2  -6  775.10   11.15
   0   1  -6  939.11   16.16
  -1   0  -6 1865.76   40.34
  -2  -1  -6  123.99    4.44
  -3  -2  -6  533.30   10.97
  -4  -3  -6 2226.05   30.30
  -5  -4  -6 1428.02   21.65
  -6  -5  -6  420.50   11.21
  -7  -6  -6   78.15   15.61
  -8  -7  -6  846.82   28.26
  -9  -8  -6  222.22   30.08
 -10  -9  -6   20.02   28.72
   8  10  -6    0.96   18.54
   7   9  -6  393.21   22.37
   6   8  -6  513.45   22.55
   5   7  -6  107.82   10.95
   4   6  -6  205.85   12.47
   3   5  -6 2657.68   40.85
   2   4  -6  838.31   18.15
   1   3  -6   13.54    2.86
   0   2  -6 2326.13   34.02
  -1   1  -6 1555.64   26.25
  -2   0  -6   10.62    3.56
  -3  -1  -6 1508.72   20.24
  -4  -2  -6 3055.47   42.95
  -5  -3  -6 2048.09   32.06
  -6  -4  -6   21.09    4.88
  -7  -5  -6  624.32   21.79
  -8  -6  -6  472.18   26.03
  -9  -7  -6  113.70   27.08
 -10  -8  -6   88.03   32.44
   7  10  -6  355.39   26.73
   6   9  -6  144.82   14.95
   5   8  -6  139.04   15.40
   4   7  -6  849.55   22.22
   3   6  -6 1659.68   29.31
   2   5  -6  233.45    9.51
   1   4  -6  924.26   14.20
   0   3  -6 2730.03   34.30
  -1   2  -6 1577.31   21.31
  -2   1  -6    1.99    5.49
  -3   0  -6 2880.57   32.08
  -4  -1  -6 1874.47   32.21
  -5  -2  -6   78.35   12.69
  -6  -3  -6  650.88   13.23
  -7  -4  -6 1363.18   30.41
  -8  -5  -6  381.22   18.02
  -9  -6  -6    0.00   22.97
 -10  -7  -6  233.24   23.22
   6  10  -6    9.89   19.14
   5   9  -6  411.69   21.65
   4   8  -6 1327.64   28.20
   3   7  -6  493.32   17.69
   2   6  -6    0.00   11.58
   1   5  -6 1443.12   22.74
   0   4  -6 1422.85   22.94
  -1   3  -6  123.54    6.80
  -2   2  -6  637.10   10.88
  -3   1  -6 1577.03   19.07
  -4   0  -6  260.64    7.16
  -5  -1  -6  306.69   14.24
  -6  -2  -6 1930.51   27.55
  -7  -3  -6 1107.33   25.17
  -8  -4  -6  287.82   17.59
  -9  -5  -6   81.38   17.84
 -10  -6  -6  420.24   36.27
   6  11  -6   36.11   22.41
   5  10  -6  442.37   21.69
   4   9  -6  545.79   25.44
   3   8  -6   28.99   10.40
   2   7  -6  280.18   16.19
   1   6  -6 1610.25   27.21
   0   5  -6  806.79   15.04
  -1   4  -6   48.63    6.62
  -2   3  -6 1537.48   24.82
  -3   2  -6 1839.93   28.39
  -4   1  -6    3.71    3.21
  -5   0  -6 1068.37   21.64
  -6  -1  -6 1848.26   29.54
  -7  -2  -6  787.30   20.52
  -8  -3  -6    0.00   15.92
  -9  -4  -6  380.81   20.63
 -10  -5  -6  246.59   29.15
   5  11  -6  302.57   22.20
   4  10  -6   76.25   20.14
   3   9  -6  141.04   16.04
   2   8  -6  894.13   23.26
   1   7  -6 1392.13   26.90
   0   6  -6  280.56   19.98
  -1   5  -6  537.63   15.11
  -2   4  -6 1753.05   26.61
  -3   3  -6  211.05    9.32
  -4   2  -6  166.68    6.41
  -5   1  -6 1893.44   30.70
  -6   0  -6  826.88   15.44
  -7  -1  -6  100.11   17.71
  -8  -2  -6  276.59   15.17
  -9  -3  -6  681.79   22.50
 -10  -4  -6  149.78   20.97
   4  11  -6    1.48   18.10
   3  10  -6  390.60   23.59
   2   9  -6  856.77   31.19
   1   8  -6  463.15   17.26
   0   7  -6   31.74   17.10
  -1   6  -6  542.14   16.34
  -2   5  -6  595.00   18.83
  -3   4  -6   28.47    7.83
  -4   3  -6  566.75   21.70
  -5   2  -6 1239.47   35.41
  -6   1  -6  406.94   25.02
  -7   0  -6   98.16   19.34
  -8  -1  -6  844.18   24.79
  -9  -2  -6  632.14   26.98
 -10  -3  -6   51.89   16.45
   3  11  -6  343.94   34.12
   2  10  -6  503.31   25.26
   1   9  -6   28.05   14.76
   0   8  -6  245.62   17.76
  -1   7  -6  931.20   26.55
  -2   6  -6  294.16   17.86
  -3   5  -6   85.60    9.54
  -4   4  -6 1012.85   29.66
  -5   3  -6  727.13   25.33
  -6   2  -6    0.00   20.95
  -7   1  -6  499.51   19.78
  -8   0  -6  838.97   28.72
  -9  -1  -6  249.62   23.32
 -10  -2  -6    0.00   15.93
   1  10  -6  117.36   18.53
   0   9  -6  485.31   17.94
  -1   8  -6  621.33   21.03
  -2   7  -6   85.41   11.10
  -3   6  -6  246.33   14.78
  -4   5  -6  692.53   25.05
  -5   4  -6   74.98   18.71
  -6   3  -6  161.40   23.19
  -7   2  -6  852.35   23.82
  -8   1  -6  478.76   24.83
  -9   0  -6   18.67   10.98
 -10  -1  -6  140.31   34.81
  -1   9  -6  191.51   21.81
  -2   8  -6    3.16    9.43
  -3   7  -6  372.40   23.79
  -4   6  -6  355.23   16.35
  -5   5  -6    0.00   20.11
  -6   4  -6  437.99   17.69
  -7   3  -6  678.80   22.94
  -8   2  -6  215.56   20.21
  -9   1  -6   20.80   13.60
  -3   8  -6  345.61   26.07
  -4   7  -6  117.11   18.01
  -5   6  -6  166.78   20.57
  -6   5  -6  485.51   26.71
  -7   4  -6  312.19   26.30
   6  -5  -7  197.44   29.93
   5  -6  -7  496.42   51.56
   4  -7  -7  151.55   36.25
   3  -8  -7  120.23   23.91
   8  -2  -7  140.77   17.49
   7  -3  -7   25.03   16.22
   6  -4  -7  297.30   37.08
   5  -5  -7  207.91   46.09
   4  -6  -7   28.55   22.45
   3  -7  -7  384.26   45.98
   2  -8  -7  829.47   42.45
   1  -9  -7  250.05   53.18
   9   0  -7  368.54   23.66
   8  -1  -7   60.38   17.66
   7  -2  -7  120.48   14.33
   6  -3  -7  398.45   18.60
   5  -4  -7  217.82    9.35
   4  -5  -7  250.69   36.64
   3  -6  -7 1125.08   57.99
   2  -7  -7  876.89   41.06
   1  -8  -7   33.89   31.79
   0  -9  -7  180.65   27.57
  -1 -10  -7  218.01   54.86
   9   1  -7  162.70   22.85
   8   0  -7   35.24   19.41
   7  -1  -7  513.66   19.78
   6  -2  -7  460.57   16.52
   5  -3  -7   14.62    4.41
   4  -4  -7  576.06   12.05
   3  -5  -7  814.05   37.86
   2  -6  -7   96.86   29.02
   1  -7  -7  145.37   31.68
   0  -8  -7  544.68   53.65
  -1  -9  -7  500.99   20.38
  -2 -10  -7    8.10    9.10
  -3 -11  -7   93.15   22.09
  10   3  -7  209.82   20.34
   9   2  -7    9.95   20.19
   8   1  -7  288.98   16.85
   7   0  -7  551.68   18.80
   6  -1  -7  120.34   10.94
   5  -2  -7   92.17    8.12
   4  -3  -7  688.04   13.87
   3  -4  -7  745.10   19.91
   2  -5  -7    0.00    7.16
   1  -6  -7  786.82   11.17
   0  -7  -7 1585.41   23.52
  -1  -8  -7  406.01   12.12
  -2  -9  -7   36.58   16.76
  -3 -10  -7  225.76   19.29
  -4 -11  -7  160.78   17.62
  10   4  -7   76.09   22.34
   9   3  -7   80.37   19.01
   8   2  -7  591.87   21.25
   7   1  -7  766.50   23.82
   6   0  -7    7.93    9.84
   5  -1  -7  671.60   23.44
   4  -2  -7  809.99   14.22
   3  -3  -7  341.86   16.89
   2  -4  -7  380.19   10.68
   1  -5  -7 1686.50   21.83
   0  -6  -7  916.03   15.03
  -1  -7  -7   28.93   10.63
  -2  -8  -7  251.52   17.74
  -3  -9  -7  509.72   16.98
  -4 -10  -7   25.64   16.04
  -5 -11  -7   64.83   14.55
  10   5  -7    0.00   22.89
   9   4  -7  483.14   21.29
   8   3  -7  759.92   27.14
   7   2  -7  161.34   13.20
   6   1  -7  127.75   15.22
   5   0  -7  771.58   20.24
   4  -1  -7  649.61   12.75
   3  -2  -7   16.78    5.27
   2  -3  -7  993.82   17.29
   1  -4  -7 2041.62   34.44
   0  -5  -7  258.36    6.37
  -1  -6  -7  592.92   16.09
  -2  -7  -7  848.14   18.30
  -3  -8  -7  574.99   17.67
  -4  -9  -7    2.19   15.23
  -5 -10  -7  230.76   17.44
  -6 -11  -7  423.00   27.04
  10   6  -7  171.52   26.01
   9   5  -7  519.18   22.88
   8   4  -7  408.89   23.26
   7   3  -7   12.23    7.24
   6   2  -7  455.17   20.37
   5   1  -7  980.90   18.83
   4   0  -7  198.89    7.00
   3  -1  -7  539.90   10.87
   2  -2  -7 2193.10   38.28
   1  -3  -7 1915.20   37.98
   0  -4  -7    3.99    2.79
  -1  -5  -7  751.18   14.07
  -2  -6  -7 1495.73   18.19
  -3  -7  -7  275.34   14.44
  -4  -8  -7  141.04   12.41
  -5  -9  -7  571.80   25.43
  -6 -10  -7  243.89   21.50
  -7 -11  -7    0.00   23.94
  10   7  -7  295.03   28.70
   9   6  -7  542.50   32.48
   8   5  -7  162.12   22.57
   7   4  -7  149.63   13.67
   6   3  -7  801.73   19.97
   5   2  -7 1054.65   19.12
   4   1  -7    0.00    9.75
   3   0  -7 2296.65   26.97
   2  -1  -7 2131.95   38.03
   1  -2  -7 1013.86   23.53
   0  -3  -7  514.20   11.07
  -1  -4  -7 2196.28   24.25
  -2  -5  -7  493.52    9.44
  -3  -6  -7   73.03   13.30
  -4  -7  -7  524.30   12.17
  -5  -8  -7  763.70   29.72
  -6  -9  -7   83.11   14.27
  -7 -10  -7  113.73   21.36
   9   7  -7  264.88   32.72
   8   6  -7    9.37   19.50
   7   5  -7  546.13   22.21
   6   4  -7  906.09   22.04
   5   3  -7   31.70    9.72
   4   2  -7  538.91   22.69
   3   1  -7 1773.02   23.67
   2   0  -7  808.62   13.33
   1  -1  -7  201.73    7.71
   0  -2  -7  955.34   13.27
  -1  -3  -7 2728.47   28.82
  -2  -4  -7 1001.95   14.85
  -3  -5  -7  574.19   19.45
  -4  -6  -7 1370.57   21.62
  -5  -7  -7  693.76   15.85
  -6  -8  -7   29.51   11.28
  -7  -9  -7  475.40   25.00
  -8 -10  -7  415.22   24.23
   9   8  -7   36.63   30.79
   8   7  -7  144.23   23.94
   7   6  -7  683.05   28.85
   6   5  -7  552.94   15.01
   5   4  -7    8.74    5.09
   4   3  -7 1127.74   28.49
   3   2  -7 1534.61   23.95
   2   1  -7  357.57    9.05
   1   0  -7  833.15   14.91
   0  -1  -7 5141.43   68.17
  -1  -2  -7 3473.87   37.41
  -2  -3  -7    3.02    2.49
  -3  -4  -7 1296.81   24.69
  -4  -5  -7  577.38   13.57
  -5  -6  -7    8.13    4.89
  -6  -7  -7  367.32   16.84
  -7  -8  -7  567.13   21.91
  -8  -9  -7  421.46   24.93
  -9 -10  -7    0.00   25.44
   9   9  -7   74.69   16.58
   8   8  -7  669.44   33.19
   7   7  -7  828.46   31.81
   6   6  -7  231.38   17.94
   5   5  -7  228.03   10.23
   4   4  -7  938.07   27.06
   3   3  -7  981.82   18.93
   2   2  -7   81.87    6.01
   1   1  -7 3544.57   50.11
   0   0  -7 2740.04   48.09
  -1  -1  -7  576.46   23.50
  -2  -2  -7  257.10    5.42
  -3  -3  -7 1941.69   31.49
  -4  -4  -7  432.95   10.19
  -5  -5  -7  117.99    6.95
  -6  -6  -7 1065.96   32.53
  -7  -7  -7 1254.52   30.62
  -8  -8  -7   69.84   18.18
  -9  -9  -7  104.77   19.96
   8   9  -7  773.53   37.83
   7   8  -7  384.24   22.30
   6   7  -7   14.24   18.25
   5   6  -7  384.79   14.73
   4   5  -7  601.66   20.59
   3   4  -7   11.78    7.06
   2   3  -7  731.93   13.99
   1   2  -7 3523.16   39.57
   0   1  -7 2489.77   54.83
  -1   0  -7   40.21    8.88
  -2  -1  -7 2076.64   26.88
  -3  -2  -7 2116.58   30.76
  -4  -3  -7  496.16   12.83
  -5  -4  -7  994.62   20.26
  -6  -5  -7  803.85   15.63
  -7  -6  -7  317.59   20.02
  -8  -7  -7   15.12   15.48
  -9  -8  -7  463.46   34.80
   8  10  -7  262.87   50.88
   7   9  -7   58.27   20.75
   6   8  -7  308.93   19.28
   5   7  -7  720.01   21.22
   4   6  -7  617.60   19.50
   3   5  -7   91.30   10.94
   2   4  -7 2378.84   38.72
   1   3  -7 2781.93   32.41
   0   2  -7  300.73   10.55
  -1   1  -7  727.79   14.29
  -2   0  -7 2742.74   40.08
  -3  -1  -7 1336.72   19.52
  -4  -2  -7   37.82   22.32
  -5  -3  -7  745.22   22.97
  -6  -4  -7  755.34   14.89
  -7  -5  -7   17.07   12.19
  -8  -6  -7  521.17   24.96
  -9  -7  -7  742.92   39.08
 -10  -8  -7  377.27   36.75
   7  10  -7   37.41   25.34
   6   9  -7  672.41   20.89
   5   8  -7  836.00   24.65
   4   7  -7  112.87    9.66
   3   6  -7  387.91   24.64
   2   5  -7 1373.58   32.34
   1   4  -7  368.20    9.38
   0   3  -7  238.63    8.87
  -1   2  -7 2956.51   35.28
  -2   1  -7 2966.26   49.52
  -3   0  -7  738.36   13.91
  -4  -1  -7  393.41   21.90
  -5  -2  -7 1621.87   26.82
  -6  -3  -7  250.31   10.86
  -7  -4  -7  237.60   13.50
  -8  -5  -7  772.12   26.93
  -9  -6  -7  629.35   34.35
 -10  -7  -7  127.67   24.52
   6  10  -7  566.92   26.94
   5   9  -7  315.41   22.38
   4   8  -7   52.63    9.79
   3   7  -7  424.07   21.80
   2   6  -7  452.41   13.24
   1   5  -7    4.53    8.11
   0   4  -7 1328.82   18.73
  -1   3  -7 3273.89   41.58
  -2   2  -7 2997.67   42.07
  -3   1  -7    7.46    3.12
  -4   0  -7 1301.19   20.97
  -5  -1  -7 1195.03   24.06
  -6  -2  -7   85.88   13.44
  -7  -3  -7  646.55   16.47
  -8  -4  -7  770.60   28.50
  -9  -5  -7  172.99   23.99
 -10  -6  -7   37.31   28.98
   5  10  -7    9.54   18.04
   4   9  -7  345.40   22.92
   3   8  -7  666.09   24.64
   2   7  -7  190.76   11.82
   1   6  -7  139.37   12.39
   0   5  -7 1775.36   33.02
  -1   4  -7 1834.32   31.26
  -2   3  -7  242.38    8.96
  -3   2  -7  529.19   11.35
  -4   1  -7 1761.45   25.25
  -5   0  -7  488.43   16.10
  -6  -1  -7   46.65   17.40
  -7  -2  -7  703.83   17.84
  -8  -3  -7  588.85   26.83
  -9  -4  -7   29.25   12.43
 -10  -5  -7  312.98   30.07
   4  10  -7  486.94   24.21
   3   9  -7  398.05   20.64
   2   8  -7   37.07   13.24
   1   7  -7  447.81   20.25
   0   6  -7  950.90   27.65
  -1   5  -7  402.30   22.98
  -2   4  -7  418.00   10.89
  -3   3  -7 1898.35   27.80
  -4   2  -7 1634.91   23.67
  -5   1  -7  110.10   12.68
  -6   0  -7  425.80   16.77
  -7  -1  -7  996.74   22.21
  -8  -2  -7  240.06   16.56
  -9  -3  -7   78.80   14.64
 -10  -4  -7  520.86   27.55
   3  10  -7   81.70   21.86
   2   9  -7   68.58   23.91
   1   8  -7  573.18   21.54
   0   7  -7  518.23   18.18
  -1   6  -7   12.60    8.22
  -2   5  -7  873.75   20.65
  -3   4  -7 1556.24   34.89
  -4   3  -7  771.15   25.91
  -5   2  -7    9.44   20.31
  -6   1  -7  697.46   32.09
  -7   0  -7  489.22   21.19
  -8  -1  -7    7.33    8.84
  -9  -2  -7  504.82   25.80
 -10  -3  -7  581.26   26.51
   2  10  -7  359.85   23.99
   1   9  -7  504.28   20.92
   0   8  -7  106.87   12.28
  -1   7  -7  126.39   24.10
  -2   6  -7  789.66   24.36
  -3   5  -7  819.05   23.19
  -4   4  -7   92.38   16.44
  -5   3  -7  303.14   16.48
  -6   2  -7  949.53   35.00
  -7   1  -7  166.08   15.61
  -8   0  -7  179.22   23.50
  -9  -1  -7  659.05   31.12
 -10  -2  -7  477.23   25.56
   1  10  -7  191.22   19.56
   0   9  -7    0.00   12.32
  -1   8  -7  331.77   20.71
  -2   7  -7  574.96   22.14
  -3   6  -7  222.01   19.87
  -4   5  -7   95.53   16.39
  -5   4  -7  750.10   26.03
  -6   3  -7  524.71   28.14
  -7   2  -7    0.00   14.19
  -8   1  -7  371.20   24.63
  -9   0  -7  486.27   26.00
  -1   9  -7  432.66   26.95
  -2   8  -7  351.44   21.32
  -3   7  -7   36.52   16.93
  -4   6  -7  310.95   15.98
  -5   5  -7  590.69   25.31
  -6   4  -7  149.62   26.19
  -7   3  -7   61.75   17.25
  -8   2  -7  389.21   22.55
  -4   7  -7  349.27   22.89
  -5   6  -7  308.22   27.87
  -6   5  -7    4.47   10.23
  -7   4  -7  152.94   33.81
   7  -3  -8  291.12   21.94
   6  -4  -8   72.30   14.15
   5  -5  -8  220.84   47.60
   4  -6  -8  457.01   39.39
   3  -7  -8  205.15   43.55
   2  -8  -8   97.76   35.94
   1  -9  -8  484.43   59.50
   8  -1  -8  478.88   25.21
   7  -2  -8   86.20   12.13
   6  -3  -8   55.93   18.02
   5  -4  -8  510.13   13.29
   4  -5  -8  361.81   41.56
   3  -6  -8    0.00   34.65
   2  -7  -8  324.84   30.07
   1  -8  -8  569.31   40.42
   0  -9  -8  164.53   24.35
  -1 -10  -8   66.99   51.83
   9   1  -8  424.97   24.86
   8   0  -8  307.23   23.29
   7  -1  -8    0.00   11.41
   6  -2  -8  521.11   18.45
   5  -3  -8 1013.11   26.03
   4  -4  -8  229.74   13.02
   3  -5  -8  143.88   23.36
   2  -6  -8  671.66   36.37
   1  -7  -8  484.92   35.96
   0  -8  -8   13.27    9.67
  -1  -9  -8  444.97   22.93
  -2 -10  -8  349.91   27.54
   9   2  -8  262.20   21.62
   8   1  -8   44.64   11.13
   7   0  -8  270.36   18.17
   6  -1  -8 1304.98   28.58
   5  -2  -8  405.05   15.92
   4  -3  -8   59.07    7.10
   3  -4  -8  250.91    9.49
   2  -5  -8  573.07   12.71
   1  -6  -8  124.10    5.19
   0  -7  -8  182.42    9.18
  -1  -8  -8  946.66   21.93
  -2  -9  -8  566.82   20.65
  -3 -10  -8   22.33   17.30
  -4 -11  -8  178.25   16.71
  10   4  -8  229.16   38.63
   9   3  -8  125.91   18.13
   8   2  -8   60.48   11.52
   7   1  -8  673.42   25.26
   6   0  -8 1231.98   27.17
   5  -1  -8  297.38   14.43
   4  -2  -8   91.15    6.15
   3  -3  -8  813.36   15.91
   2  -4  -8  479.77   12.89
   1  -5  -8    1.02    5.61
   0  -6  -8 1317.78   20.72
  -1  -7  -8 1274.23   19.45
  -2  -8  -8  268.62   14.86
  -3  -9  -8   87.83    9.24
  -4 -10  -8  398.12   20.29
  -5 -11  -8  281.28   19.64
  10   5  -8  226.15   24.15
   9   4  -8    0.00   15.75
   8   3  -8  241.92   21.78
   7   2  -8 1007.13   26.80
   6   1  -8  559.62   21.16
   5   0  -8   19.14   11.24
   4  -1  -8  705.51   14.00
   3  -2  -8 1187.48   23.31
   2  -3  -8  302.02   14.43
   1  -4  -8  334.02   11.60
   0  -5  -8 1510.33   22.94
  -1  -6  -8  822.54   14.14
  -2  -7  -8    8.31    8.00
  -3  -8  -8  738.21   19.63
  -4  -9  -8  518.68   24.03
  -5 -10  -8  108.55   16.40
  -6 -11  -8   37.22   20.22
  10   6  -8  125.81   44.23
   9   5  -8   21.47   17.80
   8   4  -8  465.57   22.65
   7   3  -8  571.64   18.53
   6   2  -8   93.50   13.57
   5   1  -8  231.52   11.73
   4   0  -8 2432.39   38.09
   3  -1  -8  716.99   11.88
   2  -2  -8   27.57    9.40
   1  -3  -8  786.70   12.62
   0  -4  -8  903.10   13.27
  -1  -5  -8   18.89    5.77
  -2  -6  -8  451.28   12.06
  -3  -7  -8 1505.29   28.73
  -4  -8  -8 1031.44   25.39
  -5  -9  -8   49.91   16.46
  -6 -10  -8  198.59   19.08
   9   6  -8   85.08   26.16
   8   5  -8  432.94   20.33
   7   4  -8  300.01   16.50
   6   3  -8   94.33   10.23
   5   2  -8  960.22   25.42
   4   1  -8 2161.57   43.13
   3   0  -8  297.97    8.25
   2  -1  -8  320.25   13.66
   1  -2  -8 1070.85   15.17
   0  -3  -8  769.88   16.45
  -1  -4  -8   11.45    3.12
  -2  -5  -8 2855.63   35.00
  -3  -6  -8 2660.05   36.91
  -4  -7  -8  343.33   10.50
  -5  -8  -8  134.56   17.07
  -6  -9  -8  376.10   18.81
  -7 -10  -8   96.23   23.19
   9   7  -8  301.68   31.63
   8   6  -8  365.68   23.25
   7   5  -8    0.00   18.26
   6   4  -8  421.38   15.67
   5   3  -8 1780.42   39.59
   4   2  -8 1210.97   22.60
   3   1  -8   19.44    4.45
   2   0  -8 1299.76   17.63
   1  -1  -8 1343.51   18.60
   0  -2  -8   60.46   10.51
  -1  -3  -8  719.67   10.28
  -2  -4  -8 1933.94   27.51
  -3  -5  -8  707.62   13.68
  -4  -6  -8    5.21    5.05
  -5  -7  -8  856.99   18.58
  -6  -8  -8  629.15   20.65
  -7  -9  -8  135.08   20.67
  -8 -10  -8  144.04   17.65
   9   8  -8  294.67   33.92
   8   7  -8  203.76   25.32
   7   6  -8  115.06   22.22
   6   5  -8 1061.76   25.51
   5   4  -8 1057.57   22.76
   4   3  -8   97.31    7.83
   3   2  -8  170.33   11.14
   2   1  -8 1424.09   20.33
   1   0  -8  438.36   16.66
   0  -1  -8   54.40    8.33
  -1  -2  -8  768.23   12.02
  -2  -3  -8 3095.34   33.05
  -3  -4  -8   41.87    5.60
  -4  -5  -8 1184.48   22.28
  -5  -6  -8 2273.46   32.31
  -6  -7  -8  817.92   24.29
  -7  -8  -8   23.99   12.83
  -8  -9  -8  193.00   24.26
   8   8  -8   21.88   26.72
   7   7  -8  334.37   24.06
   6   6  -8 1046.23   33.31
   5   5  -8  632.49   15.80
   4   4  -8  130.21   10.19
   3   3  -8 1085.87   24.04
   2   2  -8 2672.26   34.22
   1   1  -8  366.29   20.14
   0   0  -8 1294.60   25.45
  -1  -1  -8 2490.57   36.73
  -2  -2  -8  248.07    6.62
  -3  -3  -8   75.88   10.37
  -4  -4  -8 2177.09   30.60
  -5  -5  -8 1376.01   22.53
  -6  -6  -8  333.11   15.70
  -7  -7  -8   65.05   11.32
  -8  -8  -8  540.42   23.03
  -9  -9  -8  120.31   19.50
   8   9  -8  125.84   31.67
   7   8  -8  560.10   29.20
   6   7  -8  548.82   22.15
   5   6  -8   23.45    7.64
   4   5  -8  636.37   18.94
   3   4  -8 1905.86   34.30
   2   3  -8 1180.57   17.02
   1   2  -8   17.47    4.00
   0   1  -8  876.55   15.94
  -1   0  -8 1580.00   26.02
  -2  -1  -8   15.36    3.99
  -3  -2  -8  444.04   12.74
  -4  -3  -8 2201.40   33.14
  -5  -4  -8  801.26   16.59
  -6  -5  -8   76.99    7.04
  -7  -6  -8  929.35   26.22
  -8  -7  -8  539.25   29.84
  -9  -8  -8   48.03   26.02
   7   9  -8  365.59   23.28
   6   8  -8  130.38   17.03
   5   7  -8  117.66   12.25
   4   6  -8 1036.23   25.33
   3   5  -8 1353.54   28.24
   2   4  -8  162.39    8.71
   1   3  -8  268.05    7.92
   0   2  -8 1928.09   24.83
  -1   1  -8  467.57   16.23
  -2   0  -8  211.44   16.65
  -3  -1  -8 1342.23   19.49
  -4  -2  -8 2455.02   38.07
  -5  -3  -8  172.03    9.92
  -6  -4  -8  527.93   12.94
  -7  -5  -8 1374.94   28.16
  -8  -6  -8  392.84   24.08
  -9  -7  -8    2.15   26.41
 -10  -8  -8  351.79   37.58
   7  10  -8  178.11   26.48
   6   9  -8   24.24   15.02
   5   8  -8  651.91   22.86
   4   7  -8 1276.89   27.94
   3   6  -8  760.97   19.81
   2   5  -8  294.07   11.34
   1   4  -8 1288.61   22.73
   0   3  -8 1200.38   20.39
  -1   2  -8  120.51    9.03
  -2   1  -8 1398.48   24.38
  -3   0  -8 2324.25   33.61
  -4  -1  -8  987.28   17.10
  -5  -2  -8    0.00   10.24
  -6  -3  -8 1112.04   21.40
  -7  -4  -8  792.32   20.53
  -8  -5  -8   52.32   19.14
  -9  -6  -8  140.96   24.32
 -10  -7  -8  404.71   36.27
   6  10  -8  120.36   22.60
   5   9  -8  772.01   28.06
   4   8  -8  673.32   20.49
   3   7  -8   44.51   13.65
   2   6  -8  425.71   13.23
   1   5  -8 1171.68   24.98
   0   4  -8  345.33   12.33
  -1   3  -8  107.52    8.28
  -2   2  -8 1238.79   17.78
  -3   1  -8 1797.43   23.10
  -4   0  -8   11.39    6.53
  -5  -1  -8  541.00   19.84
  -6  -2  -8 1377.04   27.57
  -7  -3  -8  438.10   14.41
  -8  -4  -8   43.75   16.49
  -9  -5  -8  667.01   29.03
 -10  -6  -8  410.51   35.24
   5  10  -8  470.11   23.08
   4   9  -8  169.03   22.06
   3   8  -8   80.94   13.46
   2   7  -8  653.50   21.07
   1   6  -8  763.83   18.10
   0   5  -8   66.91    8.24
  -1   4  -8  542.72   14.57
  -2   3  -8 1462.40   21.02
  -3   2  -8  638.81   18.19
  -4   1  -8  464.19   12.45
  -5   0  -8 1443.65   26.05
  -6  -1  -8 1666.83   33.37
  -7  -2  -8  135.12   10.52
  -8  -3  -8  171.16   19.26
  -9  -4  -8  473.28   20.47
 -10  -5  -8  116.87   28.54
   4  10  -8   19.34   20.49
   3   9  -8  503.10   23.57
   2   8  -8  973.09   31.54
   1   7  -8  387.91   15.11
   0   6  -8  116.14   16.81
  -1   5  -8  831.29   23.20
  -2   4  -8  539.90   12.95
  -3   3  -8   22.41   10.69
  -4   2  -8  869.07   17.52
  -5   1  -8 1593.71   27.79
  -6   0  -8  499.40   13.05
  -7  -1  -8   22.68   14.74
  -8  -2  -8  469.70   20.21
  -9  -3  -8  411.44   20.58
 -10  -4  -8    0.00   20.65
   3  10  -8  697.96   34.20
   2   9  -8  573.99   31.47
   1   8  -8   83.34   11.37
   0   7  -8  265.69   17.30
  -1   6  -8  508.14   21.46
  -2   5  -8  120.20   14.09
  -3   4  -8  325.56   15.31
  -4   3  -8  931.63   26.16
  -5   2  -8 1148.05   30.32
  -6   1  -8   21.94   16.72
  -7   0  -8  251.87   21.20
  -8  -1  -8  596.83   22.50
  -9  -2  -8  211.87   23.87
 -10  -3  -8   49.21   17.07
   2  10  -8  189.84   27.19
   1   9  -8   94.25   14.81
   0   8  -8  459.00   19.62
  -1   7  -8  347.63   25.94
  -2   6  -8   38.85   16.06
  -3   5  -8  489.70   16.31
  -4   4  -8 1005.48   27.98
  -5   3  -8  408.93   18.56
  -6   2  -8  102.29   22.56
  -7   1  -8  777.94   26.91
  -8   0  -8  632.43   28.27
  -9  -1  -8   60.21   23.16
 -10  -2  -8   88.22   18.47
   1  10  -8  385.58   44.87
   0   9  -8  431.83   18.98
  -1   8  -8  112.58   16.88
  -2   7  -8   62.22   19.00
  -3   6  -8  464.51   19.61
  -4   5  -8  341.44   20.43
  -5   4  -8    0.00   19.86
  -6   3  -8  635.06   33.58
  -7   2  -8  731.93   24.22
  -8   1  -8  225.19   21.88
  -9   0  -8    1.22   14.08
  -1   9  -8   14.05   17.31
  -2   8  -8  151.27   29.22
  -3   7  -8  241.73   20.93
  -4   6  -8   19.88   15.84
  -5   5  -8  249.68   22.74
  -6   4  -8  690.00   33.01
  -7   3  -8  520.15   22.61
  -8   2  -8   28.73   18.54
  -5   6  -8  455.75   45.16
   7  -3  -9  212.76   19.55
   6  -4  -9  345.68   22.87
   5  -5  -9  175.58   45.04
   4  -6  -9   50.25   34.92
   3  -7  -9  571.99   51.74
   1  -9  -9    0.00   43.63
   8  -1  -9   27.43   17.99
   7  -2  -9  299.45   14.75
   6  -3  -9  338.73   26.65
   5  -4  -9   20.83   17.90
   4  -5  -9  616.88   48.54
   3  -6  -9  579.25   43.29
   2  -7  -9  212.72   47.48
   1  -8  -9   61.27   29.65
   0  -9  -9  335.50   31.55
  -1 -10  -9  255.50   49.48
   9   1  -9    9.08   22.87
   8   0  -9  183.79   21.70
   7  -1  -9  276.42   20.62
   6  -2  -9   11.39   15.57
   5  -3  -9  249.21   14.43
   4  -4  -9  772.23   16.49
   3  -5  -9  438.78   12.96
   2  -6  -9    0.00   11.47
   1  -7  -9  256.63   15.83
   0  -8  -9  550.26   15.86
  -1  -9  -9  134.25   14.32
  -2 -10  -9  139.35   16.60
   9   2  -9   33.41   22.20
   8   1  -9  298.90   20.06
   7   0  -9  275.12   21.88
   6  -1  -9   20.34   12.92
   5  -2  -9  867.10   21.93
   4  -3  -9  899.14   22.78
   3  -4  -9  123.80    9.28
   2  -5  -9  102.80   11.69
   1  -6  -9  689.10   12.97
   0  -7  -9  566.15   12.55
  -1  -8  -9    2.18    7.36
  -2  -9  -9  342.57   20.80
  -3 -10  -9  354.98   20.74
   9   3  -9  301.89   24.83
   8   2  -9  502.05   25.71
   7   1  -9  105.48   18.78
   6   0  -9  237.90   14.01
   5  -1  -9  743.79   25.52
   4  -2  -9  591.07   16.41
   3  -3  -9    0.00   10.46
   2  -4  -9  899.29   19.45
   1  -5  -9 1084.00   16.56
   0  -6  -9  329.64   10.39
  -1  -7  -9   96.88    9.13
  -2  -8  -9  623.94   20.44
  -3  -9  -9  153.97   12.88
  -4 -10  -9   12.14   17.50
  -5 -11  -9  267.52   28.11
   9   4  -9  570.92   24.97
   8   3  -9  231.01   21.01
   7   2  -9    2.28    8.86
   6   1  -9  435.08   20.14
   5   0  -9  712.96   26.87
   4  -1  -9    2.87    5.19
   3  -2  -9  612.81   20.42
   2  -3  -9 1509.75   24.19
   1  -4  -9  985.32   18.96
   0  -5  -9   12.71    4.52
  -1  -6  -9  382.99   13.60
  -2  -7  -9  753.82   17.67
  -3  -8  -9  168.02   12.33
  -4  -9  -9  343.74   21.57
  -5 -10  -9  626.19   22.09
   9   5  -9  356.22   22.23
   8   4  -9   41.99   18.65
   7   3  -9  213.46   14.11
   6   2  -9  381.83   19.92
   5   1  -9  333.70   17.89
   4   0  -9   33.77   11.65
   3  -1  -9 1879.68   25.22
   2  -2  -9 2339.02   30.99
   1  -3  -9  435.15   14.00
   0  -4  -9  282.03    7.46
  -1  -5  -9 1180.82   21.24
  -2  -6  -9  399.62   11.80
  -3  -7  -9   11.59   11.35
  -4  -8  -9  461.77   14.46
  -5  -9  -9  402.99   21.32
  -6 -10  -9   71.10   20.19
   9   6  -9  272.70   28.89
   8   5  -9    0.00   17.06
   7   4  -9  574.07   21.66
   6   3  -9  680.38   23.34
   5   2  -9   82.61   14.43
   4   1  -9 1077.49   24.76
   3   0  -9 2051.26   28.28
   2  -1  -9  690.70   16.73
   1  -2  -9  131.02   12.71
   0  -3  -9  864.96   19.04
  -1  -4  -9  822.87   12.69
  -2  -5  -9  359.52    9.97
  -3  -6  -9   85.54   11.18
  -4  -7  -9 1403.99   24.24
  -5  -8  -9  422.34   20.13
  -6  -9  -9   33.18   16.86
  -7 -10  -9  539.87   27.09
   9   7  -9   56.13   29.58
   8   6  -9  142.85   24.38
   7   5  -9  676.16   27.25
   6   4  -9  165.77   12.85
   5   3  -9   78.52   13.49
   4   2  -9  934.99   26.71
   3   1  -9 1467.28   23.93
   2   0  -9   86.60   13.95
   1  -1  -9  852.40   21.14
   0  -2  -9 2312.87   27.77
  -1  -3  -9 1724.89   20.29
  -2  -4  -9  121.45    7.66
  -3  -5  -9 1095.25   20.66
  -4  -6  -9  834.07   21.23
  -5  -7  -9   43.53   10.22
  -6  -8  -9  344.22   20.23
  -7  -9  -9  570.08   25.51
  -8 -10  -9  230.97   22.68
   9   8  -9   49.93   31.78
   8   7  -9  444.13   31.62
   7   6  -9  443.30   26.70
   6   5  -9   58.46    9.43
   5   4  -9  668.87   23.07
   4   3  -9 1117.47   26.99
   3   2  -9  476.74   19.50
   2   1  -9  128.26    7.39
   1   0  -9 2676.99   42.71
   0  -1  -9 1973.43   29.45
  -1  -2  -9  313.88   12.96
  -2  -3  -9   75.31    5.31
  -3  -4  -9 1099.15   22.14
  -4  -5  -9  477.10   15.36
  -5  -6  -9   21.61    5.81
  -6  -7  -9  886.39   19.97
  -7  -8  -9  700.92   21.84
  -8  -9  -9   59.70   25.86
   8   8  -9  621.27   36.25
   7   7  -9  175.82   20.61
   6   6  -9   62.48   25.94
   5   5  -9  842.59   19.98
   4   4  -9  430.53   20.21
   3   3  -9   38.71   12.49
   2   2  -9  999.85   16.63
   1   1  -9 2618.24   38.19
   0   0  -9 2099.86   39.02
  -1  -1  -9   27.07   17.51
  -2  -2  -9 1283.45   19.16
  -3  -3  -9  968.37   18.02
  -4  -4  -9    0.44    7.10
  -5  -5  -9  562.45   14.03
  -6  -6  -9 1379.90   25.99
  -7  -7  -9  466.36   20.32
  -8  -8  -9    1.74   19.19
  -9  -9  -9  290.83   25.86
   8   9  -9  336.05   33.65
   7   8  -9   13.01   21.76
   6   7  -9  188.39   21.55
   5   6  -9  662.72   19.81
   4   5  -9  110.44   14.02
   3   4  -9  351.95   12.66
   2   3  -9 2158.49   31.26
   1   2  -9 2430.48   36.24
   0   1  -9   77.11   14.72
  -1   0  -9 1218.92   31.28
  -2  -1  -9 1339.87   22.17
  -3  -2  -9  728.49   13.42
  -4  -3  -9   47.12    6.02
  -5  -4  -9 1031.52   21.21
  -6  -5  -9 1093.64   20.82
  -7  -6  -9  226.88   15.69
  -8  -7  -9  405.05   23.26
  -9  -8  -9  576.29   29.81
   7   9  -9   41.70   27.27
   6   8  -9  467.30   23.95
   5   7  -9  356.04   19.03
   4   6  -9    5.46    8.37
   3   5  -9  971.48   23.94
   2   4  -9 1737.48   33.37
   1   3  -9  580.55   11.82
   0   2  -9  109.09   13.84
  -1   1  -9 2560.73   40.14
  -2   0  -9 1927.40   31.55
  -3  -1  -9  158.59    7.59
  -4  -2  -9  291.15   15.64
  -5  -3  -9 1155.73   29.24
  -6  -4  -9  329.82   11.94
  -7  -5  -9  140.70   19.02
  -8  -6  -9  566.39   25.64
  -9  -7  -9  674.99   37.41
   6   9  -9  566.95   21.44
   5   8  -9  112.98   16.82
   4   7  -9  123.38   11.75
   3   6  -9 1014.59   24.95
   2   5  -9  667.70   18.43
   1   4  -9   27.13    7.04
   0   3  -9  968.43   20.21
  -1   2  -9 1809.47   24.01
  -2   1  -9 1003.20   21.74
  -3   0  -9   42.17    5.30
  -4  -1  -9 1151.33   26.78
  -5  -2  -9  757.72   18.44
  -6  -3  -9   27.77   13.62
  -7  -4  -9  836.30   23.10
  -8  -5  -9 1411.71   41.42
  -9  -6  -9  411.57   31.84
 -10  -7  -9  108.16   47.36
   6  10  -9  293.33   24.22
   5   9  -9    9.04   18.45
   4   8  -9  327.10   19.61
   3   7  -9  730.73   26.93
   2   6  -9   94.91   11.05
   1   5  -9  490.32   14.22
   0   4  -9 1668.17   32.20
  -1   3  -9 1226.73   21.76
  -2   2  -9  165.56   18.78
  -3   1  -9 1011.42   21.52
  -4   0  -9 1012.10   29.46
  -5  -1  -9  277.04   13.63
  -6  -2  -9  262.30   17.20
  -7  -3  -9  820.62   20.28
  -8  -4  -9  763.27   27.49
  -9  -5  -9  148.91   23.57
 -10  -6  -9   94.10   31.74
   5  10  -9   79.87   19.55
   4   9  -9  465.12   27.81
   3   8  -9  298.05   20.50
   2   7  -9   18.51   14.94
   1   6  -9  742.90   17.06
   0   5  -9 1516.16   33.53
  -1   4  -9  473.61   16.56
  -2   3  -9   67.58   11.26
  -3   2  -9 1453.99   25.48
  -4   1  -9  795.65   19.46
  -5   0  -9    9.21   10.12
  -6  -1  -9  488.01   20.46
  -7  -2  -9  918.12   25.09
  -8  -3  -9  290.38   23.86
  -9  -4  -9  128.84   18.08
 -10  -5  -9  531.92   34.53
   4  10  -9  380.67   24.49
   3   9  -9   35.89   11.96
   2   8  -9  155.31   19.26
   1   7  -9  994.16   25.05
   0   6  -9  718.53   28.89
  -1   5  -9   29.89   17.42
  -2   4  -9  758.19   16.92
  -3   3  -9  899.43   17.39
  -4   2  -9  292.04   14.98
  -5   1  -9  228.11   13.28
  -6   0  -9  817.83   24.27
  -7  -1  -9  468.59   19.15
  -8  -2  -9   14.96   19.00
  -9  -3  -9  475.32   20.84
 -10  -4  -9  747.96   30.79
   3  10  -9   36.77   26.46
   2   9  -9  385.24   29.00
   1   8  -9  690.89   23.32
   0   7  -9   98.70   15.57
  -1   6  -9  209.37   16.64
  -2   5  -9  982.74   23.39
  -3   4  -9  482.40   17.67
  -4   3  -9   58.57   19.70
  -5   2  -9  356.73   21.94
  -6   1  -9  687.29   36.24
  -7   0  -9   87.65   24.45
  -8  -1  -9  132.52   17.02
  -9  -2  -9  660.61   28.76
 -10  -3  -9  419.10   24.00
   2  10  -9  511.85   34.12
   1   9  -9  280.55   23.16
   0   8  -9   10.61   12.88
  -1   7  -9  689.15   30.91
  -2   6  -9  939.27   26.87
  -3   5  -9  238.37   16.22
  -4   4  -9   77.65   18.91
  -5   3  -9  514.40   21.34
  -6   2  -9  341.79   28.52
  -7   1  -9   39.25   14.12
  -8   0  -9  490.76   28.42
  -9  -1  -9  524.24   29.70
   0   9  -9  200.66   16.58
  -1   8  -9  527.59   25.43
  -2   7  -9  444.46   24.98
  -3   6  -9    0.00   17.18
  -4   5  -9  270.57   22.09
  -5   4  -9  504.69   31.05
  -6   3  -9   52.25   24.42
  -7   2  -9  203.72   17.24
  -8   1  -9  658.87   30.25
  -9   0  -9  249.06   28.57
  -2   8  -9  114.26   21.90
  -3   7  -9   60.72   21.40
  -4   6  -9  486.90   20.38
  -5   5  -9  155.61   22.53
  -6   4  -9    6.37   17.95
  -7   3  -9  302.35   27.71
  -8   2  -9  504.42   36.55
   6  -4 -10   54.02   22.76
   5  -5 -10  286.84   50.73
   4  -6 -10   92.33   32.85
   3  -7 -10    0.00   40.15
   8  -1 -10  219.45   29.21
   7  -2 -10   18.93   14.86
   6  -3 -10  204.30   22.26
   5  -4 -10  620.07   26.46
   4  -5 -10   65.34    8.46
   3  -6 -10  134.17   39.50
   2  -7 -10  523.78   55.34
   1  -8 -10  305.30   35.88
   0  -9 -10   43.00   25.44
   8   0 -10    0.00   22.06
   7  -1 -10  220.88   18.58
   6  -2 -10  725.73   23.76
   5  -3 -10  481.74   24.43
   4  -4 -10    2.51   12.45
   3  -5 -10  260.78   14.08
   2  -6 -10  388.80   15.21
   1  -7 -10    0.00   11.59
   0  -8 -10  127.13   12.59
  -1  -9 -10  618.34   22.75
  -2 -10 -10  349.37   22.06
   9   2 -10  188.75   23.34
   8   1 -10   27.39   11.68
   7   0 -10  441.04   21.63
   6  -1 -10  515.62   21.09
   5  -2 -10  133.80   17.92
   4  -3 -10   69.43   16.85
   3  -4 -10  543.93   18.51
   2  -5 -10  160.70   11.82
   1  -6 -10   56.56    5.16
   0  -7 -10  480.12   13.25
  -1  -8 -10  830.57   18.69
  -2  -9 -10   92.46   17.95
  -3 -10 -10   38.88   20.47
   9   3 -10   34.75   19.30
   8   2 -10  276.34   23.67
   7   1 -10  567.48   25.04
   6   0 -10  290.63   18.83
   5  -1 -10   51.09   16.52
   4  -2 -10  412.51   21.57
   3  -3 -10  776.80   21.69
   2  -4 -10   90.84   10.16
   1  -5 -10  360.02   12.16
   0  -6 -10 1106.48   22.12
  -1  -7 -10  496.16   15.90
  -2  -8 -10    0.00   11.51
  -3  -9 -10  487.15   23.17
  -4 -10 -10  401.60   20.88
   9   4 -10  108.81   16.77
   8   3 -10  723.65   30.35
   7   2 -10  666.89   29.04
   6   1 -10   66.56   19.46
   5   0 -10  174.45   15.70
   4  -1 -10  968.40   23.18
   3  -2 -10  629.99   18.86
   2  -3 -10   87.21   11.12
   1  -4 -10  914.37   26.22
   0  -5 -10  804.96   16.56
  -1  -6 -10    3.56   10.09
  -2  -7 -10  179.71    9.89
  -3  -8 -10  683.25   22.09
  -4  -9 -10  390.12   21.83
  -5 -10 -10   14.08   15.88
   9   5 -10  376.94   28.93
   8   4 -10  851.59   36.66
   7   3 -10  386.05   17.49
   6   2 -10    0.00   16.08
   5   1 -10  414.45   14.05
   4   0 -10  426.03   16.87
   3  -1 -10   57.39    8.75
   2  -2 -10  230.61   15.20
   1  -3 -10 1298.13   21.11
   0  -4 -10  504.85   10.25
  -1  -5 -10   33.64   10.07
  -2  -6 -10  741.54   14.78
  -3  -7 -10 1476.37   30.41
  -4  -8 -10   99.68    9.75
  -5  -9 -10  153.43   20.48
  -6 -10 -10  444.53   23.32
   9   6 -10  321.31   33.42
   8   5 -10  527.16   25.48
   7   4 -10    0.00   12.42
   6   3 -10  362.19   19.47
   5   2 -10 1010.66   24.93
   4   1 -10  935.60   28.35
   3   0 -10  114.07    8.62
   2  -1 -10 1365.35   31.74
   1  -2 -10 1270.48   20.36
   0  -3 -10   13.60    9.75
  -1  -4 -10 1050.74   16.18
  -2  -5 -10 1046.80   18.29
  -3  -6 -10  508.76   14.97
  -4  -7 -10   16.16    7.22
  -5  -8 -10  340.15   19.01
  -6  -9 -10  433.08   19.84
  -7 -10 -10    5.95   22.13
   9   7 -10  376.02   35.99
   8   6 -10  107.43   20.45
   7   5 -10  174.96   20.49
   6   4 -10 1666.30   35.05
   5   3 -10 1179.33   32.33
   4   2 -10   93.29   17.43
   3   1 -10  274.54   10.22
   2   0 -10  590.64   20.48
   1  -1 -10  242.23    7.25
   0  -2 -10   96.87    8.49
  -1  -3 -10  981.20   14.06
  -2  -4 -10 2102.17   35.63
  -3  -5 -10  178.50   10.62
  -4  -6 -10  278.83   14.56
  -5  -7 -10  832.85   19.32
  -6  -8 -10  194.10   14.72
  -7  -9 -10   87.71   20.99
   8   7 -10    0.00   23.46
   7   6 -10  524.45   30.26
   6   5 -10 1259.32   31.81
   5   4 -10  575.81   26.22
   4   3 -10   25.32   11.90
   3   2 -10  734.59   17.97
   2   1 -10  755.38   16.35
   1   0 -10   29.42    8.49
   0  -1 -10 1340.88   27.58
  -1  -2 -10 2737.34   37.62
  -2  -3 -10  754.51   16.20
  -3  -4 -10  180.31    8.62
  -4  -5 -10  448.63   13.80
  -5  -6 -10  803.63   16.70
  -6  -7 -10   44.07   13.41
  -7  -8 -10  179.62   16.96
  -8  -9 -10  457.45   28.87
   8   8 -10  165.79   29.96
   7   7 -10  722.90   32.83
   6   6 -10  693.25   33.81
   5   5 -10    1.15    7.21
   4   4 -10  722.96   19.12
   3   3 -10 1134.91   23.58
   2   2 -10  509.62   13.12
   1   1 -10  223.45   16.93
   0   0 -10 1624.68   31.97
  -1  -1 -10 1768.23   29.01
  -2  -2 -10  252.60    7.47
  -3  -3 -10  908.14   14.20
  -4  -4 -10 1566.97   29.25
  -5  -5 -10  432.72   13.83
  -6  -6 -10    0.57   15.25
  -7  -7 -10  382.93   15.17
  -8  -8 -10  320.80   20.53
   7   8 -10  510.86   31.36
   6   7 -10  113.79   23.70
   5   6 -10  185.91   15.20
   4   5 -10 1517.57   33.24
   3   4 -10  981.68   23.09
   2   3 -10   80.24    9.26
   1   2 -10  492.39   19.08
   0   1 -10 1380.90   28.45
  -1   0 -10  258.39   10.52
  -2  -1 -10  641.26   14.76
  -3  -2 -10 1462.47   19.45
  -4  -3 -10 1557.41   27.60
  -5  -4 -10  190.50   12.43
  -6  -5 -10  118.61   10.71
  -7  -6 -10  405.85   16.06
  -8  -7 -10  189.55   24.99
  -9  -8 -10  136.98   32.61
   7   9 -10  242.09   30.47
   6   8 -10    5.53   16.19
   5   7 -10  488.57   22.53
   4   6 -10 1345.96   34.07
   3   5 -10  545.19   20.88
   2   4 -10  110.60   13.22
   1   3 -10 1009.60   17.75
   0   2 -10  543.23   12.72
  -1   1 -10   48.66    8.44
  -2   0 -10 1595.99   29.10
  -3  -1 -10 2971.62   42.22
  -4  -2 -10 1059.26   19.82
  -5  -3 -10   27.59    9.36
  -6  -4 -10  586.58   15.93
  -7  -5 -10  497.67   22.08
  -8  -6 -10    9.39   19.08
  -9  -7 -10  190.58   31.28
   6   9 -10  227.89   20.70
   5   8 -10  879.37   27.40
   4   7 -10  834.80   25.14
   3   6 -10    4.74   15.93
   2   5 -10  804.57   20.18
   1   4 -10 1000.22   21.12
   0   3 -10  154.63    9.83
  -1   2 -10  388.77   14.80
  -2   1 -10 2109.97   38.35
  -3   0 -10 1288.92   24.01
  -4  -1 -10  139.71   13.33
  -5  -2 -10  730.60   17.47
  -6  -3 -10  941.99   25.24
  -7  -4 -10  283.15   18.89
  -8  -5 -10   40.64   17.28
  -9  -6 -10  321.15   29.40
   5   9 -10  647.12   28.33
   4   8 -10  137.05   16.98
   3   7 -10  169.17   16.85
   2   6 -10  822.40   19.78
   1   5 -10  546.77   16.39
   0   4 -10    4.50    5.79
  -1   3 -10  449.84   16.49
  -2   2 -10 1442.87   26.81
  -3   1 -10  383.51   15.49
  -4   0 -10  330.75   14.34
  -5  -1 -10 1369.97   26.03
  -6  -2 -10 1014.74   28.01
  -7  -3 -10   27.60    7.74
  -8  -4 -10  297.74   18.97
  -9  -5 -10  289.61   22.86
 -10  -6 -10   96.31   17.65
   5  10 -10  268.92   21.99
   4   9 -10   25.59   20.43
   3   8 -10  477.55   26.19
   2   7 -10  857.92   27.26
   1   6 -10  203.36   14.18
   0   5 -10  233.14   12.69
  -1   4 -10 1129.03   24.20
  -2   3 -10  520.94   12.80
  -3   2 -10   12.82   12.00
  -4   1 -10 1291.35   25.73
  -5   0 -10 1406.10   28.70
  -6  -1 -10  434.55   19.90
  -7  -2 -10   36.45   16.25
  -8  -3 -10  389.68   20.44
  -9  -4 -10  314.14   22.68
 -10  -5 -10   43.88   28.98
   4  10 -10  217.81   23.61
   3   9 -10  599.72   27.65
   2   8 -10  450.63   25.23
   1   7 -10   25.51   14.66
   0   6 -10  630.88   22.51
  -1   5 -10  980.50   28.44
  -2   4 -10   74.38   12.04
  -3   3 -10  413.14   15.75
  -4   2 -10 1521.64   29.43
  -5   1 -10  906.71   22.28
  -6   0 -10   24.60   10.73
  -7  -1 -10  311.86   18.50
  -8  -2 -10  470.03   19.98
  -9  -3 -10   43.01   18.18
 -10  -4 -10   23.89   28.38
   3  10 -10  469.85   41.97
   2   9 -10  105.72   27.30
   1   8 -10   91.70   15.79
   0   7 -10  618.89   23.05
  -1   6 -10  253.88   17.90
  -2   5 -10   45.65   14.83
  -3   4 -10  667.30   23.28
  -4   3 -10  902.24   27.94
  -5   2 -10  349.59   24.69
  -6   1 -10  126.86   20.02
  -7   0 -10  653.61   34.46
  -8  -1 -10  335.02   22.05
  -9  -2 -10    8.77   22.58
   1   9 -10  314.19   25.10
   0   8 -10  402.92   20.69
  -1   7 -10   19.72   23.68
  -2   6 -10  356.38   21.59
  -3   5 -10  752.12   23.71
  -4   4 -10  433.47   21.34
  -5   3 -10    0.15   10.14
  -6   2 -10  466.61   28.34
  -7   1 -10  757.87   34.74
  -8   0 -10   78.78   23.73
  -9  -1 -10    0.23   25.31
   0   9 -10  112.42   19.58
  -1   8 -10   18.90   19.66
  -2   7 -10  462.45   27.47
  -3   6 -10  518.08   22.93
  -4   5 -10   30.43   15.70
  -5   4 -10  154.73   30.52
  -6   3 -10  670.83   36.75
  -7   2 -10  367.28   21.23
  -8   1 -10   20.98   21.36
  -3   7 -10  232.07   21.37
  -4   6 -10   29.94   13.83
  -5   5 -10  444.12   27.30
  -6   4 -10  493.53   31.62
  -7   3 -10   50.06   24.76
   5  -5 -11    0.00   44.22
   4  -6 -11  267.12   40.93
   3  -7 -11  476.12   44.27
   7  -2 -11  252.93   16.66
   6  -3 -11   23.66   22.05
   5  -4 -11  195.12   21.78
   4  -5 -11  539.62   23.18
   3  -6 -11  290.02   15.63
   2  -7 -11   14.47   42.90
   1  -8 -11  177.36   32.57
   0  -9 -11  220.94   26.93
   8   0 -11  383.44   25.78
   7  -1 -11   69.18   16.88
   6  -2 -11   61.78   18.63
   5  -3 -11  670.14   21.16
   4  -4 -11  710.03   21.92
   3  -5 -11   86.23    9.84
   2  -6 -11   92.18   18.58
   1  -7 -11  356.11   16.10
   0  -8 -11  188.72   16.59
  -1  -9 -11   50.03   18.44
   8   1 -11  170.92   20.19
   7   0 -11    0.00   19.00
   6  -1 -11  580.65   23.54
   5  -2 -11  871.50   26.00
   4  -3 -11  440.14   19.22
   3  -4 -11    5.82    9.02
   2  -5 -11  505.40   20.98
   1  -6 -11  549.46   13.66
   0  -7 -11   59.18   11.61
  -1  -8 -11  117.20    9.54
  -2  -9 -11  438.99   17.73
  -3 -10 -11  186.40   20.57
   9   3 -11  551.51   30.55
   8   2 -11  141.32   20.03
   7   1 -11   90.04   20.81
   6   0 -11  916.03   25.68
   5  -1 -11  635.84   22.97
   4  -2 -11   42.25   11.09
   3  -3 -11  317.40   16.34
   2  -4 -11  705.79   22.77
   1  -5 -11  452.91   18.06
   0  -6 -11    0.00   11.33
  -1  -7 -11  317.55   11.08
  -2  -8 -11  409.52   17.10
  -3  -9 -11   33.65   11.97
  -4 -10 -11  154.95   19.57
   9   4 -11  346.84   23.50
   8   3 -11    0.00   20.94
   7   2 -11  211.70   22.06
   6   1 -11  539.15   21.52
   5   0 -11   25.21   16.10
   4  -1 -11   78.84   26.00
   3  -2 -11 1048.63   28.53
   2  -3 -11 1462.67   30.01
   1  -4 -11  194.76   13.50
   0  -5 -11  401.59   12.32
  -1  -6 -11  694.31   15.87
  -2  -7 -11  216.20   13.64
  -3  -8 -11  144.33   14.45
  -4  -9 -11  455.31   20.48
  -5 -10 -11  373.03   19.63
   9   5 -11  197.90   26.36
   8   4 -11   20.28   22.91
   7   3 -11  384.42   22.19
   6   2 -11  409.49   19.15
   5   1 -11   12.97   14.00
   4   0 -11 1394.01   30.43
   3  -1 -11 1970.61   35.85
   2  -2 -11  536.33   14.29
   1  -3 -11    0.00   11.00
   0  -4 -11  636.54   13.98
  -1  -5 -11  363.15   13.94
  -2  -6 -11   46.06   10.38
  -3  -7 -11  181.95   13.93
  -4  -8 -11  809.73   25.98
  -5  -9 -11  337.39   20.43
  -6 -10 -11    9.34   19.10
   8   5 -11  139.89   20.33
   7   4 -11  722.15   28.14
   6   3 -11  101.58   20.67
   5   2 -11  132.80   17.69
   4   1 -11 1234.32   28.63
   3   0 -11 1003.93   23.57
   2  -1 -11  102.65   10.21
   1  -2 -11  432.28   14.86
   0  -3 -11 1296.83   31.67
  -1  -4 -11  507.69   15.29
  -2  -5 -11  138.52   10.42
  -3  -6 -11 1020.48   21.62
  -4  -7 -11  559.89   17.37
  -5  -8 -11   20.82   14.10
  -6  -9 -11  190.60   20.02
  -7 -10 -11  506.41   23.57
   8   6 -11  284.99   26.27
   7   5 -11  458.41   27.13
   6   4 -11   16.11    9.02
   5   3 -11  572.09   22.64
   4   2 -11 1509.18   32.14
   3   1 -11   43.07    8.60
   2   0 -11  564.07   18.40
   1  -1 -11 1439.83   27.33
   0  -2 -11 1092.16   22.89
  -1  -3 -11  149.98    9.26
  -2  -4 -11  451.30   12.53
  -3  -5 -11  641.95   15.86
  -4  -6 -11  379.54   21.05
  -5  -7 -11  105.26   14.33
  -6  -8 -11  655.33   22.06
  -7  -9 -11  534.30   26.22
   8   7 -11  407.29   32.77
   7   6 -11  123.29   24.66
   6   5 -11  178.88   17.21
   5   4 -11 1037.97   29.46
   4   3 -11  626.11   21.58
   3   2 -11    0.00   19.49
   2   1 -11  966.06   19.72
   1   0 -11 1769.06   33.54
   0  -1 -11  777.74   17.30
  -1  -2 -11   91.14   11.34
  -2  -3 -11 1440.21   22.41
  -3  -4 -11  684.28   19.71
  -4  -5 -11   20.76   14.64
  -5  -6 -11  481.21   15.13
  -6  -7 -11  838.55   20.84
  -7  -8 -11  255.98   14.26
  -8  -9 -11    0.00   28.05
   8   8 -11  343.90   34.79
   7   7 -11    0.00   19.05
   6   6 -11  318.52   30.18
   5   5 -11 1178.44   39.17
   4   4 -11  270.32   16.36
   3   3 -11  271.73   18.40
   2   2 -11 1536.05   26.98
   1   1 -11 1027.92   23.73
   0   0 -11   11.26    6.55
  -1  -1 -11  919.72   22.82
  -2  -2 -11 1191.25   18.80
  -3  -3 -11  300.99   13.19
  -4  -4 -11  218.97   14.10
  -5  -5 -11 1135.40   21.72
  -6  -6 -11  701.01   22.02
  -7  -7 -11   89.07   12.92
  -8  -8 -11  254.70   31.05
   7   8 -11  100.37   23.59
   6   7 -11  419.83   31.50
   5   6 -11  316.93   18.88
   4   5 -11   73.70   20.05
   3   4 -11  762.25   20.93
   2   3 -11 1880.38   32.76
   1   2 -11  286.95   12.76
   0   1 -11  278.08   13.65
  -1   0 -11 1363.78   30.65
  -2  -1 -11 1077.56   21.72
  -3  -2 -11    0.00   10.92
  -4  -3 -11  862.78   18.41
  -5  -4 -11 1107.50   26.03
  -6  -5 -11  233.49   14.76
  -7  -6 -11   82.89   15.80
  -8  -7 -11  535.16   32.52
  -9  -8 -11  275.75   34.45
   6   8 -11  391.86   30.70
   5   7 -11  132.99   22.48
   4   6 -11  320.04   22.31
   3   5 -11 1731.22   35.36
   2   4 -11 1354.11   32.67
   1   3 -11   26.39    4.81
   0   2 -11  644.58   20.22
  -1   1 -11  867.07   23.34
  -2   0 -11   54.93   12.77
  -3  -1 -11   41.51   10.61
  -4  -2 -11 1284.70   21.91
  -5  -3 -11  969.08   26.11
  -6  -4 -11    4.97    6.72
  -7  -5 -11  540.26   25.96
  -8  -6 -11  721.70   24.58
  -9  -7 -11  123.51   29.95
   6   9 -11  327.84   25.09
   5   8 -11   22.88   17.80
   4   7 -11  552.53   21.44
   3   6 -11 1497.93   31.73
   2   5 -11  362.14   18.69
   1   4 -11  407.15   17.84
   0   3 -11 1066.14   27.10
  -1   2 -11  750.01   16.36
  -2   1 -11   33.64   10.52
  -3   0 -11  734.21   17.01
  -4  -1 -11 1234.35   24.61
  -5  -2 -11  142.79   17.40
  -6  -3 -11  306.81   21.17
  -7  -4 -11 1085.24   33.21
  -8  -5 -11  348.89   20.06
  -9  -6 -11   14.26   26.68
   5   9 -11  166.75   21.39
   4   8 -11  518.29   26.01
   3   7 -11  350.25   19.83
   2   6 -11   95.68   14.00
   1   5 -11 1087.87   26.81
   0   4 -11 1538.52   32.77
  -1   3 -11  354.96   13.39
  -2   2 -11   65.01   12.18
  -3   1 -11  857.96   27.70
  -4   0 -11  464.61   17.76
  -5  -1 -11    9.03   11.00
  -6  -2 -11  926.05   25.93
  -7  -3 -11  978.85   29.04
  -8  -4 -11  228.70   20.33
  -9  -5 -11   80.41   24.74
   4   9 -11  345.88   28.63
   3   8 -11   80.71   26.83
   2   7 -11  398.11   22.66
   1   6 -11 1452.32   32.78
   0   5 -11 1318.29   26.60
  -1   4 -11   68.63   12.67
  -2   3 -11  332.76   16.45
  -3   2 -11  789.35   21.56
  -4   1 -11   22.40    9.78
  -5   0 -11  282.52   14.83
  -6  -1 -11 1174.55   28.83
  -7  -2 -11  706.24   30.01
  -8  -3 -11    0.00   17.39
  -9  -4 -11  246.41   25.91
   3   9 -11   75.55   17.73
   2   8 -11  652.32   32.15
   1   7 -11  968.93   32.43
   0   6 -11  255.07   21.27
  -1   5 -11  311.43   21.22
  -2   4 -11  923.42   27.78
  -3   3 -11  386.83   14.80
  -4   2 -11   53.90   10.71
  -5   1 -11  630.28   17.80
  -6   0 -11  753.25   21.00
  -7  -1 -11  183.40   20.00
  -8  -2 -11  105.51   18.51
  -9  -3 -11  725.74   35.87
   2   9 -11  583.96   33.50
   1   8 -11  301.61   23.00
   0   7 -11   51.88   23.13
  -1   6 -11  791.14   23.63
  -2   5 -11  947.61   29.44
  -3   4 -11  121.75   13.43
  -4   3 -11  139.70   20.80
  -5   2 -11  482.21   24.47
  -6   1 -11  325.08   28.15
  -7   0 -11    0.00   25.48
  -8  -1 -11  467.39   27.20
  -9  -2 -11  666.96   31.11
   1   9 -11   13.69   23.23
   0   8 -11  261.16   24.28
  -1   7 -11  910.54   30.34
  -2   6 -11  537.22   24.57
  -3   5 -11    4.26   12.78
  -4   4 -11  298.60   23.67
  -5   3 -11  437.70   27.19
  -6   2 -11    0.00   25.83
  -7   1 -11  301.58   27.00
  -8   0 -11  780.43   32.57
  -9  -1 -11  398.08   29.65
  -1   8 -11  448.29   29.10
  -2   7 -11   81.78   22.05
  -3   6 -11  218.54   19.71
  -4   5 -11  374.02   23.48
  -5   4 -11  175.80   29.84
  -6   3 -11   95.51   28.08
  -7   2 -11  415.02   21.44
  -8   1 -11  461.56   26.41
  -4   6 -11  459.58   23.06
  -5   5 -11    9.14   13.45
  -6   4 -11  211.00   54.73
   6  -3 -12  250.41   25.99
   5  -4 -12  126.59   22.89
   4  -5 -12   36.57   15.12
   3  -6 -12  374.26   19.94
   2  -7 -12  338.13   21.74
   1  -8 -12   22.47   14.21
   7  -1 -12  445.10   26.04
   6  -2 -12  448.63   21.85
   5  -3 -12   19.85    8.38
   4  -4 -12  258.01   16.45
   3  -5 -12  445.55   18.94
   2  -6 -12  190.04   22.67
   1  -7 -12   23.88    9.36
   0  -8 -12  266.01   18.17
  -1  -9 -12  388.81   23.10
   8   1 -12  242.51   24.06
   7   0 -12  778.90   29.40
   6  -1 -12  370.26   19.91
   5  -2 -12   27.30   19.35
   4  -3 -12  393.84   20.96
   3  -4 -12  227.42   17.00
   2  -5 -12    2.29   13.49
   1  -6 -12  251.60   10.60
   0  -7 -12  679.30   16.57
  -1  -8 -12  291.60   12.70
  -2  -9 -12    0.00   15.62
   8   2 -12  406.43   44.85
   7   1 -12  698.02   28.29
   6   0 -12   56.25   13.52
   5  -1 -12  261.82   23.93
   4  -2 -12  524.85   18.61
   3  -3 -12  198.01   18.39
   2  -4 -12  154.24   12.34
   1  -5 -12  929.84   26.03
   0  -6 -12  699.62   17.54
  -1  -7 -12  141.92   13.43
  -2  -8 -12  167.67   16.25
  -3  -9 -12  307.18   21.93
  -4 -10 -12  148.49   19.64
   8   3 -12  620.51   29.73
   7   2 -12  234.80   21.77
   6   1 -12   62.95   20.11
   5   0 -12  833.18   29.72
   4  -1 -12  434.73   34.57
   3  -2 -12    0.00   15.44
   2  -3 -12  334.95   14.36
   1  -4 -12  994.99   28.98
   0  -5 -12  439.80   15.37
  -1  -6 -12   12.15   13.87
  -2  -7 -12  428.42   14.73
  -3  -8 -12  350.56   18.80
  -4  -9 -12    3.91   14.77
  -5 -10 -12  181.94   18.18
   8   4 -12  293.50   25.81
   7   3 -12   66.38   13.70
   6   2 -12  164.87   23.76
   5   1 -12  840.93   22.10
   4   0 -12  473.75   21.40
   3  -1 -12  119.09   13.29
   2  -2 -12 1310.67   31.58
   1  -3 -12  697.62   24.98
   0  -4 -12    2.10    7.23
  -1  -5 -12  588.32   18.54
  -2  -6 -12  752.57   15.81
  -3  -7 -12  245.26   16.08
  -4  -8 -12   25.48   11.81
  -5  -9 -12  273.37   18.92
   8   5 -12  165.51   27.93
   7   4 -12    8.62   22.38
   6   3 -12  684.47   29.94
   5   2 -12  907.64   24.95
   4   1 -12    0.00   15.77
   3   0 -12 1134.30   25.00
   2  -1 -12 1057.39   27.38
   1  -2 -12  248.93   16.11
   0  -3 -12  143.59   13.90
  -1  -4 -12 1225.39   22.13
  -2  -5 -12 1030.63   18.03
  -3  -6 -12  312.96   19.84
  -4  -7 -12  229.56   14.77
  -5  -8 -12  390.88   21.30
  -6  -9 -12   50.47   13.70
   8   6 -12    1.39   22.73
   7   5 -12  446.40   31.78
   6   4 -12  785.97   25.67
   5   3 -12  381.73   20.66
   4   2 -12   50.29   17.95
   3   1 -12 1492.80   43.12
   2   0 -12  856.68   31.88
   1  -1 -12   63.51   12.38
   0  -2 -12  868.33   19.05
  -1  -3 -12 1801.46   34.63
  -2  -4 -12  510.38   17.93
  -3  -5 -12   78.10   14.79
  -4  -6 -12  425.02   18.14
  -5  -7 -12  357.61   19.69
  -6  -8 -12   15.92   14.77
  -7  -9 -12  311.45   28.69
   8   7 -12  120.41   28.44
   7   6 -12  692.48   34.49
   6   5 -12  727.19   38.65
   5   4 -12   14.32   20.50
   4   3 -12  367.93   17.97
   3   2 -12  724.84   24.87
   2   1 -12   63.49   11.29
   1   0 -12  619.65   18.69
   0  -1 -12 1865.49   33.05
  -1  -2 -12 1335.49   34.29
  -2  -3 -12   88.62   14.76
  -3  -4 -12  610.17   18.50
  -4  -5 -12 1092.26   23.21
  -5  -6 -12  230.14   12.41
  -6  -7 -12   86.26   15.06
  -7  -8 -12  376.22   22.84
   7   7 -12  589.27   31.75
   6   6 -12  180.29   31.41
   5   5 -12  157.14   30.64
   4   4 -12  721.89   28.61
   3   3 -12  758.82   23.97
   2   2 -12   33.50    8.51
   1   1 -12 1834.53   32.12
   0   0 -12 1973.68   38.79
  -1  -1 -12  388.46   20.85
  -2  -2 -12  351.38   12.01
  -3  -3 -12 1321.58   25.79
  -4  -4 -12  642.14   20.79
  -5  -5 -12   81.78   13.42
  -6  -6 -12  224.74   22.12
  -7  -7 -12  459.80   20.27
  -8  -8 -12   55.29   27.01
   7   8 -12  244.27   30.16
   6   7 -12   52.26   27.50
   5   6 -12  466.39   28.84
   4   5 -12  944.52   28.36
   3   4 -12  301.61   16.18
   2   3 -12  106.92   16.72
   1   2 -12 1374.20   31.04
   0   1 -12  729.69   24.03
  -1   0 -12  188.54   13.56
  -2  -1 -12  981.88   20.10
  -3  -2 -12 1729.39   26.69
  -4  -3 -12  543.78   20.17
  -5  -4 -12  174.51   21.13
  -6  -5 -12  652.18   26.13
  -7  -6 -12  322.60   22.50
  -8  -7 -12   15.80   17.82
   6   8 -12  129.85   26.28
   5   7 -12  610.95   35.93
   4   6 -12  638.55   26.15
   3   5 -12   61.62   16.71
   2   4 -12  635.85   26.79
   1   3 -12  892.35   17.63
   0   2 -12   86.69   13.69
  -1   1 -12 1068.05   20.90
  -2   0 -12 2185.15   38.82
  -3  -1 -12 1091.74   20.83
  -4  -2 -12  109.09   15.35
  -5  -3 -12  330.24   19.91
  -6  -4 -12  784.85   25.29
  -7  -5 -12   99.50   19.86
  -8  -6 -12   69.31   15.97
  -9  -7 -12  457.77   37.14
   5   8 -12  642.16   26.29
   4   7 -12  133.70   14.78
   3   6 -12  261.73   19.76
   2   5 -12 1102.48   26.39
   1   4 -12  547.21   21.97
   0   3 -12   43.88   12.24
  -1   2 -12 1362.87   26.26
  -2   1 -12 1529.48   36.72
  -3   0 -12  372.52   14.10
  -4  -1 -12  113.14   16.74
  -5  -2 -12  979.99   25.49
  -6  -3 -12  543.06   28.89
  -7  -4 -12   34.30   20.06
  -8  -5 -12  452.64   24.19
  -9  -6 -12  503.46   34.77
   5   9 -12  345.55   26.14
   4   8 -12    0.19   11.98
   3   7 -12  490.60   24.12
   2   6 -12  683.58   21.71
   1   5 -12  136.06   17.16
   0   4 -12  308.83   16.22
  -1   3 -12 1295.24   28.14
  -2   2 -12  829.79   25.23
  -3   1 -12  105.85   14.41
  -4   0 -12  911.05   26.92
  -5  -1 -12  985.59   21.58
  -6  -2 -12  160.66   19.35
  -7  -3 -12  179.29   23.43
  -8  -4 -12  419.81   27.25
  -9  -5 -12  221.61   27.78
   4   9 -12  151.42   29.15
   3   8 -12  417.01   33.66
   2   7 -12  235.29   22.45
   1   6 -12   42.59   16.53
   0   5 -12  787.24   22.54
  -1   4 -12 1133.98   28.54
  -2   3 -12  214.79   11.43
  -3   2 -12  677.11   17.76
  -4   1 -12 1749.85   29.99
  -5   0 -12  563.51   18.13
  -6  -1 -12   18.30   16.88
  -7  -2 -12  318.76   30.05
  -8  -3 -12  535.26   25.09
  -9  -4 -12    9.82   15.96
   3   9 -12  400.54   33.95
   2   8 -12   22.69   23.56
   1   7 -12  241.64   23.42
   0   6 -12  883.99   35.87
  -1   5 -12  506.52   26.29
  -2   4 -12   64.63   13.75
  -3   3 -12 1034.51   21.69
  -4   2 -12  944.84   26.71
  -5   1 -12  110.96   15.17
  -6   0 -12  144.37   16.84
  -7  -1 -12  452.80   21.68
  -8  -2 -12  299.35   22.68
  -9  -3 -12    9.42   24.33
   2   9 -12   32.97   27.55
   1   8 -12  284.60   24.63
   0   7 -12  465.83   28.58
  -1   6 -12   29.69    9.67
  -2   5 -12  407.44   20.87
  -3   4 -12  979.48   27.85
  -4   3 -12  413.75   25.26
  -5   2 -12   27.87   22.56
  -6   1 -12  513.99   25.39
  -7   0 -12  423.04   31.75
  -8  -1 -12   65.14   15.59
  -9  -2 -12  169.83   25.99
   0   8 -12   95.35   22.13
  -1   7 -12   98.82   26.81
  -2   6 -12  797.73   29.57
  -3   5 -12  747.78   26.13
  -4   4 -12  160.34   20.76
  -5   3 -12  223.43   25.89
  -6   2 -12  591.21   26.77
  -7   1 -12  190.87   24.87
  -8   0 -12   60.84   27.09
  -2   7 -12  628.55   29.44
  -3   6 -12  293.39   21.74
  -4   5 -12   36.44   17.69
  -5   4 -12  428.37   34.14
  -6   3 -12  425.92   27.40
  -7   2 -12    9.54   17.15
   5  -4 -13  509.35   27.45
   4  -5 -13  493.77   24.89
   3  -6 -13   85.66   17.15
   2  -7 -13   87.68   10.26
   7  -1 -13    2.16   30.59
   6  -2 -13  197.69   21.45
   5  -3 -13  677.65   23.24
   4  -4 -13  121.82   17.31
   3  -5 -13   28.90   11.33
   2  -6 -13  295.66   22.05
   1  -7 -13  245.74   22.71
   0  -8 -13   18.68   15.04
   7   0 -13   28.80   20.23
   6  -1 -13  579.55   25.35
   5  -2 -13  516.00   23.89
   4  -3 -13    0.00   18.15
   3  -4 -13  306.38   14.38
   2  -5 -13  516.42   20.00
   1  -6 -13  133.23   10.25
   0  -7 -13   32.93   12.10
  -1  -8 -13  477.43   15.12
  -2  -9 -13  311.55   17.50
   8   2 -13    6.63   14.86
   7   1 -13  250.33   25.12
   6   0 -13  717.05   21.43
   5  -1 -13  307.85   20.41
   4  -2 -13   38.30    9.35
   3  -3 -13  486.77   19.11
   2  -4 -13  682.34   22.78
   1  -5 -13   28.33   16.30
   0  -6 -13  274.34   16.29
  -1  -7 -13  580.90   15.65
  -2  -8 -13   94.91   13.78
  -3  -9 -13  100.28   15.30
   8   3 -13   56.12   25.23
   7   2 -13  470.13   34.65
   6   1 -13  531.35   24.39
   5   0 -13    0.00   16.03
   4  -1 -13  341.32   26.66
   3  -2 -13 1055.42   29.64
   2  -3 -13  137.05   15.84
   1  -4 -13  125.78   15.09
   0  -5 -13  579.17   15.90
  -1  -6 -13  374.73   13.27
  -2  -7 -13    0.00   11.65
  -3  -8 -13  362.60   23.29
  -4  -9 -13  589.38   22.49
   8   4 -13  305.10   25.86
   7   3 -13  269.25   25.35
   6   2 -13   75.48   20.15
   5   1 -13  141.38   16.86
   4   0 -13  867.02   30.71
   3  -1 -13 1032.45   33.71
   2  -2 -13   83.66   15.62
   1  -3 -13  322.94   15.55
   0  -4 -13  985.68   22.74
  -1  -5 -13   75.06   10.98
  -2  -6 -13   81.43   12.49
  -3  -7 -13  828.97   23.46
  -4  -8 -13  429.47   22.36
  -5  -9 -13    0.00   15.72
   8   5 -13  371.69   40.53
   7   4 -13  227.08   30.92
   6   3 -13    7.07   20.11
   5   2 -13  550.84   24.44
   4   1 -13 1940.85   41.63
   3   0 -13  762.37   22.37
   2  -1 -13  127.45   13.82
   1  -2 -13  624.87   17.15
   0  -3 -13  443.64   19.56
  -1  -4 -13   40.84   11.85
  -2  -5 -13  520.74   17.62
  -3  -6 -13  853.12   21.82
  -4  -7 -13  144.93   13.99
  -5  -8 -13   57.45   17.64
  -6  -9 -13  486.22   22.32
   7   5 -13   97.63   30.68
   6   4 -13  321.26   20.29
   5   3 -13  847.89   31.35
   4   2 -13  786.32   21.14
   3   1 -13   32.39   20.77
   2   0 -13  421.98   19.01
   1  -1 -13 1133.31   25.59
   0  -2 -13  194.60   17.43
  -1  -3 -13  275.39   13.61
  -2  -4 -13 1154.90   24.92
  -3  -5 -13  769.41   18.08
  -4  -6 -13    0.00   18.02
  -5  -7 -13  397.52   22.05
  -6  -8 -13  573.61   24.70
  -7  -9 -13  149.71   18.96
   7   6 -13    0.00   27.56
   6   5 -13  517.89   36.23
   5   4 -13  750.95   29.38
   4   3 -13  239.26   13.77
   3   2 -13  210.96   19.51
   2   1 -13 1459.84   33.54
   1   0 -13 1320.31   32.96
   0  -1 -13   63.61   13.23
  -1  -2 -13  523.68   18.85
  -2  -3 -13 1030.97   21.50
  -3  -4 -13   59.36   12.16
  -4  -5 -13  166.41   16.98
  -5  -6 -13  823.60   22.94
  -6  -7 -13  534.10   21.59
  -7  -8 -13   17.19   17.02
   7   7 -13  150.95   25.43
   6   6 -13  644.47   37.28
   5   5 -13  305.31   31.36
   4   4 -13   34.35   20.21
   3   3 -13  569.89   25.69
   2   2 -13 1719.49   42.40
   1   1 -13  924.88   27.85
   0   0 -13  127.43   11.88
  -1  -1 -13  786.35   26.87
  -2  -2 -13  562.43   14.74
  -3  -3 -13  129.51   14.87
  -4  -4 -13 1170.98   30.82
  -5  -5 -13  989.94   25.46
  -6  -6 -13  224.46   21.45
  -7  -7 -13   28.74   12.60
  -8  -8 -13  367.18   32.24
   6   7 -13  332.64   32.07
   5   6 -13   49.07   20.61
   4   5 -13  427.29   30.07
   3   4 -13 1225.38   33.86
   2   3 -13  987.29   24.72
   1   2 -13   51.24   14.43
   0   1 -13  801.60   18.68
  -1   0 -13 1054.83   27.25
  -2  -1 -13  138.29   22.12
  -3  -2 -13  431.91   18.77
  -4  -3 -13  951.51   25.42
  -5  -4 -13  923.12   26.84
  -6  -5 -13   10.14   16.98
  -7  -6 -13  232.92   20.73
  -8  -7 -13  478.01   25.79
   6   8 -13  140.94   28.22
   5   7 -13   76.00   33.75
   4   6 -13  765.62   31.26
   3   5 -13 1116.15   30.17
   2   4 -13  365.49   19.55
   1   3 -13  131.98   11.74
   0   2 -13 1446.46   28.09
  -1   1 -13  954.57   24.62
  -2   0 -13   12.01   14.13
  -3  -1 -13  703.25   22.63
  -4  -2 -13 1042.30   20.28
  -5  -3 -13   96.17   21.10
  -6  -4 -13  233.79   17.03
  -7  -5 -13  692.81   28.98
  -8  -6 -13  378.62   21.77
   5   8 -13  239.38   32.34
   4   7 -13  821.19   27.84
   3   6 -13  450.10   21.82
   2   5 -13   42.85   16.23
   1   4 -13  747.56   29.52
   0   3 -13 1078.63   25.77
  -1   2 -13  362.81   15.97
  -2   1 -13  413.04   19.16
  -3   0 -13 1047.44   25.53
  -4  -1 -13  661.31   19.14
  -5  -2 -13   68.01   17.72
  -6  -3 -13  852.56   37.40
  -7  -4 -13  824.17   32.62
  -8  -5 -13  167.70   19.76
  -9  -6 -13   27.03   12.51
   4   8 -13  406.23   30.44
   3   7 -13   13.62   19.34
   2   6 -13  429.72   21.36
   1   5 -13 1048.70   32.53
   0   4 -13  517.61   19.87
  -1   3 -13   45.65   12.52
  -2   2 -13  850.27   21.26
  -3   1 -13 1345.17   31.41
  -4   0 -13  112.73   16.17
  -5  -1 -13  438.90   18.92
  -6  -2 -13 1101.72   30.83
  -7  -3 -13  540.43   30.70
  -8  -4 -13   24.32   20.17
  -9  -5 -13  129.45   21.28
   3   8 -13   19.15   27.44
   2   7 -13  694.62   33.79
   1   6 -13  791.19   32.68
   0   5 -13  212.44   16.29
  -1   4 -13  163.54   15.12
  -2   3 -13  907.72   19.01
  -3   2 -13  577.72   21.03
  -4   1 -13  164.61   16.80
  -5   0 -13 1086.86   27.94
  -6  -1 -13  878.58   26.36
  -7  -2 -13  140.57   29.21
  -8  -3 -13  119.11   22.36
  -9  -4 -13  336.63   22.46
   2   8 -13  581.83   33.89
   1   7 -13  342.34   22.88
   0   6 -13   44.23   24.99
  -1   5 -13  476.00   23.75
  -2   4 -13  581.61   24.42
  -3   3 -13   91.70   15.81
  -4   2 -13  645.50   22.97
  -5   1 -13 1323.92   27.15
  -6   0 -13  453.79   17.68
  -7  -1 -13   23.02   20.35
  -8  -2 -13  433.45   28.39
   1   8 -13   18.35   19.30
   0   7 -13  260.60   29.03
  -1   6 -13  605.33   24.16
  -2   5 -13  277.90   21.81
  -3   4 -13   29.77   15.11
  -4   3 -13  607.64   27.00
  -5   2 -13  659.95   28.39
  -6   1 -13   31.48   18.87
  -7   0 -13  293.12   34.42
  -8  -1 -13  511.09   29.71
  -1   7 -13  528.55   34.78
  -2   6 -13   61.55   20.78
  -3   5 -13  111.18   16.02
  -4   4 -13  528.79   26.24
  -5   3 -13  189.35   25.22
  -6   2 -13  138.02   23.46
  -7   1 -13  784.55   39.40
  -3   6 -13  321.51   22.26
  -4   5 -13  319.05   24.65
  -5   4 -13   35.11   25.55
  -6   3 -13  418.63   28.56
   6  -2 -14  155.35   15.68
   5  -3 -14   59.37   21.95
   4  -4 -14  544.39   21.38
   3  -5 -14  356.22   14.11
   2  -6 -14   21.50   22.10
   1  -7 -14  195.99   24.36
   7   0 -14  266.66   24.92
   6  -1 -14    2.08   16.54
   5  -2 -14  210.10   22.05
   4  -3 -14  425.26   22.45
   3  -4 -14   65.80   15.31
   2  -5 -14   82.96   17.37
   1  -6 -14  576.56   17.42
   0  -7 -14  552.85   18.07
  -1  -8 -14   41.37   11.02
   7   1 -14  141.30   24.36
   6   0 -14   53.80   15.72
   5  -1 -14  333.76   23.71
   4  -2 -14  245.68   22.21
   3  -3 -14    7.24   17.88
   2  -4 -14  597.79   21.86
   1  -5 -14  835.57   31.14
   0  -6 -14  382.54   16.18
  -1  -7 -14   26.39   10.64
  -2  -8 -14  379.28   19.23
  -3  -9 -14  229.95   21.67
   7   2 -14    0.45   26.62
   6   1 -14  229.01   19.09
   5   0 -14  348.09   24.01
   4  -1 -14  108.92   24.74
   3  -2 -14  138.53   19.91
   2  -3 -14 1060.89   25.51
   1  -4 -14  889.33   26.31
   0  -5 -14    5.36    6.64
  -1  -6 -14  295.52   15.75
  -2  -7 -14  594.60   20.85
  -3  -8 -14  111.28   21.93
  -4  -9 -14   12.79   18.41
   7   3 -14   50.07   18.61
   6   2 -14  448.78   29.86
   5   1 -14  334.59   22.93
   4   0 -14   10.55   18.38
   3  -1 -14  468.84   22.80
   2  -2 -14  694.45   22.44
   1  -3 -14  170.08   18.96
   0  -4 -14  194.28   17.04
  -1  -5 -14  884.77   22.58
  -2  -6 -14  582.66   20.07
  -3  -7 -14    9.52   15.16
  -4  -8 -14  247.55   20.00
  -5  -9 -14  438.34   22.66
   7   4 -14  265.97   34.21
   6   3 -14  536.27   31.93
   5   2 -14  138.86   18.60
   4   1 -14  110.05   15.66
   3   0 -14  789.54   22.86
   2  -1 -14  548.65   21.73
   1  -2 -14    0.00   15.85
   0  -3 -14 1078.22   29.37
  -1  -4 -14 1103.44   25.79
  -2  -5 -14  392.46   16.82
  -3  -6 -14   12.59   15.12
  -4  -7 -14  536.79   33.55
  -5  -8 -14  289.02   23.18
   7   5 -14  578.47   37.07
   6   4 -14  360.52   25.76
   5   3 -14    4.08   17.57
   4   2 -14  593.01   24.43
   3   1 -14  714.72   29.32
   2   0 -14   96.77   19.30
   1  -1 -14  201.26   15.56
   0  -2 -14 1165.35   24.16
  -1  -3 -14 1032.54   27.43
  -2  -4 -14   15.32   14.46
  -3  -5 -14  422.65   18.96
  -4  -6 -14  697.31   27.40
  -5  -7 -14   85.75   21.63
  -6  -8 -14  234.43   19.87
   7   6 -14  569.84   35.03
   6   5 -14  181.80   48.56
   5   4 -14  131.71   27.28
   4   3 -14  660.34   27.67
   3   2 -14  392.06   24.70
   2   1 -14   17.92   10.99
   1   0 -14  715.02   22.38
   0  -1 -14 1015.49   22.79
  -1  -2 -14  347.01   22.85
  -2  -3 -14  301.00   20.96
  -3  -4 -14 1088.68   31.43
  -4  -5 -14  401.94   18.37
  -5  -6 -14   22.65   12.21
  -6  -7 -14  395.62   22.55
  -7  -8 -14  564.77   25.38
   6   6 -14    0.00   31.41
   5   5 -14  419.03   35.57
   4   4 -14  543.72   34.31
   3   3 -14   32.16   17.07
   2   2 -14  299.46   19.24
   1   1 -14 1270.50   30.82
   0   0 -14  908.14   27.07
  -1  -1 -14   68.35   20.77
  -2  -2 -14  882.68   39.76
  -3  -3 -14 1020.81   25.05
  -4  -4 -14  209.96   15.88
  -5  -5 -14  184.14   21.45
  -6  -6 -14  596.91   23.07
  -7  -7 -14  300.48   18.94
   6   7 -14   85.28   31.98
   5   6 -14  454.84   32.90
   4   5 -14  260.92   29.64
   3   4 -14   44.46   17.68
   2   3 -14  835.03   35.38
   1   2 -14 1283.54   28.58
   0   1 -14  291.83   17.25
  -1   0 -14  164.62   18.54
  -2  -1 -14 1095.71   27.09
  -3  -2 -14  555.02   18.97
  -4  -3 -14   27.77   12.85
  -5  -4 -14  479.74   25.38
  -6  -5 -14  506.21   28.48
  -7  -6 -14   76.45   22.42
  -8  -7 -14  242.90   22.43
   5   7 -14  533.94   37.57
   4   6 -14   84.85   28.29
   3   5 -14  270.01   22.86
   2   4 -14  922.90   31.55
   1   3 -14  350.43   22.66
   0   2 -14   21.63   18.64
  -1   1 -14  960.82   25.31
  -2   0 -14 1005.70   28.17
  -3  -1 -14  341.67   14.97
  -4  -2 -14  180.13   19.08
  -5  -3 -14  964.58   37.66
  -6  -4 -14  405.76   30.50
  -7  -5 -14   56.02   22.31
  -8  -6 -14  446.82   22.49
   5   8 -14  242.07   24.99
   4   7 -14   10.25   15.52
   3   6 -14  556.31   26.55
   2   5 -14  652.91   26.83
   1   4 -14   26.54   19.57
   0   3 -14  559.78   22.87
  -1   2 -14 1661.99   30.28
  -2   1 -14 1097.75   30.74
  -3   0 -14   77.08   12.94
  -4  -1 -14  576.13   26.36
  -5  -2 -14  687.80   30.96
  -6  -3 -14   34.69   24.32
  -7  -4 -14  332.39   24.77
  -8  -5 -14  521.97   25.28
   4   8 -14  115.81   32.30
   3   7 -14  437.94   28.05
   2   6 -14  134.97   17.37
   1   5 -14  118.96   18.72
   0   4 -14  807.62   28.16
  -1   3 -14 1052.82   24.87
  -2   2 -14  309.29   18.16
  -3   1 -14  120.13   17.58
  -4   0 -14  869.06   26.24
  -5  -1 -14  349.53   15.97
  -6  -2 -14  113.19   23.43
  -7  -3 -14  690.80   33.23
  -8  -4 -14  484.19   27.37
   3   8 -14  308.83   34.53
   2   7 -14   14.45   21.05
   1   6 -14  387.12   27.06
   0   5 -14  874.95   28.81
  -1   4 -14  365.49   20.97
  -2   3 -14   84.51   14.15
  -3   2 -14  793.88   20.78
  -4   1 -14  987.74   24.63
  -5   0 -14  102.96   14.71
  -6  -1 -14  186.28   20.98
  -7  -2 -14  704.14   38.05
  -8  -3 -14  194.88   26.36
   2   8 -14   25.09   24.84
   1   7 -14  451.30   28.48
   0   6 -14  655.01   35.80
  -1   5 -14    6.79   27.02
  -2   4 -14  404.92   22.34
  -3   3 -14 1011.18   30.33
  -4   2 -14  547.03   22.93
  -5   1 -14   18.16   15.27
  -6   0 -14  305.60   19.25
  -7  -1 -14  363.10   27.42
  -8  -2 -14    0.00   33.11
   0   7 -14  210.76   28.01
  -1   6 -14  184.88   28.35
  -2   5 -14  675.71   26.89
  -3   4 -14  663.22   24.27
  -4   3 -14  123.15   23.88
  -5   2 -14   98.83   24.34
  -6   1 -14  502.48   27.32
  -7   0 -14  187.75   29.36
  -8  -1 -14   32.39   23.55
  -1   7 -14  372.33   25.51
  -2   6 -14  695.56   35.32
  -3   5 -14  230.11   19.93
  -4   4 -14   15.17   22.11
  -5   3 -14  396.70   25.85
  -6   2 -14  538.63   28.91
  -7   1 -14   55.25   17.32
   4  -4 -15    0.00   17.34
   3  -5 -15  152.14   13.17
   2  -6 -15  286.59   12.52
   6  -1 -15  491.04   24.53
   5  -2 -15  241.20   24.04
   4  -3 -15   55.16   20.97
   3  -4 -15  304.04   17.99
   2  -5 -15  266.05   17.91
   1  -6 -15    3.27    6.41
   0  -7 -15  238.66   15.42
   6   0 -15  423.39   23.34
   5  -1 -15   18.63   20.49
   4  -2 -15  134.19   35.51
   3  -3 -15  440.36   21.12
   2  -4 -15  170.45   16.00
   1  -5 -15  120.82   18.88
   0  -6 -15  360.62   18.86
  -1  -7 -15  437.62   18.91
  -2  -8 -15    9.82   14.83
   7   2 -15  417.51   36.19
   6   1 -15   41.61   21.50
   5   0 -15  117.82   19.14
   4  -1 -15  550.96   30.69
   3  -2 -15  375.47   20.92
   2  -3 -15   33.45   13.93
   1  -4 -15  419.80   22.14
   0  -5 -15  528.70   16.76
  -1  -6 -15  105.38   15.84
  -2  -7 -15  121.12   14.58
  -3  -8 -15  433.97   28.07
   7   3 -15  234.87   19.94
   6   2 -15    4.91   22.44
   5   1 -15  551.55   23.19
   4   0 -15  851.90   31.27
   3  -1 -15  354.85   22.68
   2  -2 -15   47.78   17.47
   1  -3 -15  674.81   22.94
   0  -4 -15  332.48   21.35
  -1  -5 -15    0.00   12.45
  -2  -6 -15  460.79   17.64
  -3  -7 -15  782.52   26.62
  -4  -8 -15  149.37   25.88
   7   4 -15   32.80   14.74
   6   3 -15  194.34   29.34
   5   2 -15  995.15   30.04
   4   1 -15  715.64   24.69
   3   0 -15   13.66   10.40
   2  -1 -15  281.88   18.42
   1  -2 -15  544.65   18.64
   0  -3 -15  131.68   17.79
  -1  -4 -15  331.49   15.78
  -2  -5 -15  769.46   25.12
  -3  -6 -15  597.02   23.66
  -4  -7 -15   27.82   23.51
  -5  -8 -15  252.80   22.26
   7   5 -15   47.13   16.96
   5   3 -15  772.24   30.36
   4   2 -15  196.26   19.56
   3   1 -15  228.04   20.84
   2   0 -15  755.11   23.42
   1  -1 -15  281.60   13.58
   0  -2 -15    0.00   15.11
  -1  -3 -15  721.88   31.31
  -2  -4 -15  998.00   29.98
  -3  -5 -15  211.91   16.55
  -4  -6 -15  152.04   19.33
  -5  -7 -15  569.60   26.39
  -6  -8 -15  402.78   22.93
   6   5 -15  621.48   59.95
   5   4 -15  353.30   33.36
   4   3 -15   37.48   14.79
   3   2 -15  716.91   26.28
   2   1 -15  781.33   25.01
   1   0 -15  203.08   17.60
   0  -1 -15  155.08   16.45
  -1  -2 -15  954.37   27.64
  -2  -3 -15  485.24   21.00
  -3  -4 -15    0.00   11.71
  -4  -5 -15  647.96   21.15
  -5  -6 -15  745.60   26.45
  -6  -7 -15  186.14   21.52
   6   6 -15  395.53   36.97
   5   5 -15   96.27   31.01
   4   4 -15  346.89   26.14
   3   3 -15 1014.72   37.71
   2   2 -15  706.32   23.68
   1   1 -15   33.38   18.19
   0   0 -15  452.76   20.02
  -1  -1 -15  696.45   20.29
  -2  -2 -15  101.67   22.33
  -3  -3 -15  499.69   17.86
  -4  -4 -15 1130.32   31.25
  -5  -5 -15  587.94   27.03
  -6  -6 -15   65.48   19.77
  -7  -7 -15  268.30   20.09
   5   6 -15    0.00   43.42
   4   5 -15  524.44   32.54
   3   4 -15  681.29   31.71
   2   3 -15  161.46   27.60
   1   2 -15  297.72   29.71
   0   1 -15  915.80   25.69
  -1   0 -15  277.11   18.85
  -2  -1 -15   59.95   13.38
  -3  -2 -15 1052.90   25.97
  -4  -3 -15 1211.94   32.07
  -5  -4 -15  256.27   25.30
  -6  -5 -15  116.29   24.26
  -7  -6 -15  449.11   24.79
   5   7 -15  265.80   36.44
   4   6 -15  687.37   38.58
   3   5 -15  460.21   28.35
   2   4 -15   41.76   23.28
   1   3 -15  648.46   29.58
   0   2 -15  738.94   24.52
  -1   1 -15    8.63   14.21
  -2   0 -15  290.45   29.28
  -3  -1 -15 1060.36   32.38
  -4  -2 -15  534.33   24.20
  -5  -3 -15   25.29   20.19
  -6  -4 -15  540.92   36.03
  -7  -5 -15  560.53   27.78
  -8  -6 -15  157.74   16.04
   4   7 -15  497.95   39.42
   3   6 -15   75.47   25.62
   2   5 -15  276.22   19.55
   1   4 -15  800.02   30.61
   0   3 -15  250.56   20.98
  -1   2 -15   71.82   13.21
  -2   1 -15  664.37   25.07
  -3   0 -15  567.37   21.15
  -4  -1 -15   59.32   17.23
  -5  -2 -15  506.51   26.50
  -6  -3 -15 1198.86   43.80
  -7  -4 -15  446.39   27.90
  -8  -5 -15    3.44   20.87
   3   7 -15   48.02   26.90
   2   6 -15  452.92   20.86
   1   5 -15  512.46   26.36
   0   4 -15   24.45   13.31
  -1   3 -15  249.39   17.90
  -2   2 -15  815.02   22.52
  -3   1 -15  231.81   19.17
  -4   0 -15   73.21   15.89
  -5  -1 -15  826.35   23.32
  -6  -2 -15 1045.33   40.12
  -7  -3 -15   73.40   21.69
  -8  -4 -15   77.26   23.57
   2   7 -15  442.86   29.76
   1   6 -15  360.36   29.52
   0   5 -15    6.04   12.85
  -1   4 -15  499.93   25.35
  -2   3 -15  513.37   15.80
  -3   2 -15   40.14   15.43
  -4   1 -15  402.60   19.07
  -5   0 -15  761.26   24.00
  -6  -1 -15  371.43   22.67
  -7  -2 -15   29.95   17.28
  -8  -3 -15  456.35   28.49
   1   7 -15   37.03   21.58
   0   6 -15  256.51   30.00
  -1   5 -15  505.01   33.47
  -2   4 -15  116.42   17.33
  -3   3 -15  178.45   21.75
  -4   2 -15  631.82   24.71
  -5   1 -15  483.16   23.21
  -6   0 -15   29.25   16.17
  -7  -1 -15  141.02   31.64
   0   7 -15  361.22   26.54
  -1   6 -15  361.40   34.58
  -2   5 -15   16.37   24.63
  -3   4 -15  377.46   22.81
  -4   3 -15  580.79   29.40
  -5   2 -15  222.14   25.76
  -6   1 -15   27.66   18.43
  -7   0 -15  323.80   31.22
  -3   5 -15  391.24   22.28
  -4   4 -15  367.59   26.09
  -5   3 -15    2.24   15.82
   5  -2 -16  321.79   29.59
   4  -3 -16  217.80   21.30
   3  -4 -16    0.00   14.00
   2  -5 -16  319.16   21.95
   1  -6 -16  404.36   14.29
   5  -1 -16  370.92   25.08
   4  -2 -16    3.32   33.19
   3  -3 -16  110.14   19.22
   2  -4 -16  619.61   25.46
   1  -5 -16  447.59   19.06
   0  -6 -16   17.55   15.04
  -1  -7 -16  167.87   14.15
   6   1 -16  396.28   25.33
   5   0 -16  171.76   22.73
   4  -1 -16   31.37   28.16
   3  -2 -16  335.06   25.13
   2  -3 -16  740.35   24.39
   1  -4 -16  161.04   18.31
   0  -5 -16   45.46   11.46
  -1  -6 -16  445.50   20.68
  -2  -7 -16  214.17   18.42
  -3  -8 -16   11.44   15.13
   6   2 -16  319.75   27.34
   5   1 -16   28.44   19.47
   4   0 -16  230.38   24.12
   3  -1 -16  697.96   29.26
   2  -2 -16  456.34   20.16
   1  -3 -16    5.70   16.58
   0  -4 -16  487.36   31.49
  -1  -5 -16  423.65   21.45
  -2  -6 -16   87.60   14.99
  -3  -7 -16   41.23   16.84
  -4  -8 -16  382.85   29.28
   6   3 -16  142.22   32.94
   5   2 -16   12.10   20.50
   4   1 -16  629.00   26.87
   3   0 -16  773.86   48.39
   2  -1 -16   53.60   17.68
   1  -2 -16  136.63   18.09
   0  -3 -16  766.03   28.26
  -1  -4 -16  463.53   23.94
  -2  -5 -16    3.56   14.40
  -3  -6 -16  332.38   19.06
  -4  -7 -16  375.40   26.53
   5   3 -16  161.89   22.04
   4   2 -16  695.78   25.36
   3   1 -16  335.83   25.09
   2   0 -16   57.87   17.85
   1  -1 -16  516.70   21.58
   0  -2 -16  938.91   25.51
  -1  -3 -16  133.16   16.71
  -2  -4 -16   36.52   15.56
  -3  -5 -16  461.91   21.45
  -4  -6 -16  217.77   23.25
  -5  -7 -16    1.07   22.20
   6   5 -16    0.00   24.10
   5   4 -16  289.58   31.16
   4   3 -16  315.30   25.45
   3   2 -16   38.08   22.23
   2   1 -16  501.84   27.20
   1   0 -16  967.46   30.13
   0  -1 -16  649.02   19.51
  -1  -2 -16   14.69   24.67
  -2  -3 -16  488.41   19.65
  -3  -4 -16  554.68   23.44
  -4  -5 -16   30.96   18.77
  -5  -6 -16  132.57   14.61
  -6  -7 -16  582.04   26.63
   5   5 -16  418.54   36.08
   4   4 -16   97.17   26.61
   3   3 -16  151.65   27.05
   2   2 -16  850.75   32.78
   1   1 -16 1357.85   34.39
   0   0 -16  114.35   14.67
  -1  -1 -16  157.92   20.53
  -2  -2 -16  765.16   28.79
  -3  -3 -16  354.68   21.12
  -4  -4 -16    9.27   16.35
  -5  -5 -16  391.78   24.06
  -6  -6 -16  459.91   22.74
   5   6 -16  384.39   56.40
   4   5 -16   51.20   28.48
   3   4 -16  312.20   25.97
   2   3 -16  842.83   37.49
   1   2 -16  499.55   31.36
   0   1 -16   61.62   22.67
  -1   0 -16  647.02   27.99
  -2  -1 -16  793.09   24.49
  -3  -2 -16   77.73   17.15
  -4  -3 -16  165.64   15.52
  -5  -4 -16  623.97   33.09
  -6  -5 -16  178.66   26.15
  -7  -6 -16    6.30   22.37
   4   6 -16   32.22   30.09
   3   5 -16  340.94   25.75
   2   4 -16  481.31   33.21
   1   3 -16   39.99   38.96
   0   2 -16  573.17   33.50
  -1   1 -16 1051.03   37.32
  -2   0 -16  418.94   29.04
  -3  -1 -16   20.13   19.59
  -4  -2 -16  454.20   21.60
  -5  -3 -16  563.59   33.50
  -6  -4 -16    7.41   17.46
  -7  -5 -16  228.54   26.51
   3   6 -16  512.72   32.47
   2   5 -16  133.42   27.15
   1   4 -16   72.35   29.87
   0   3 -16  783.03   31.03
  -1   2 -16  974.12   23.87
  -2   1 -16  115.50   24.58
  -3   0 -16  129.78   16.70
  -4  -1 -16  520.20   25.73
  -5  -2 -16  286.98   29.31
  -6  -3 -16   83.51   27.66
  -7  -4 -16  522.21   30.83
   3   7 -16  147.59   46.32
   2   6 -16   21.15   17.35
   1   5 -16  441.95   26.05
   0   4 -16  774.89   28.72
  -1   3 -16  421.57   21.78
  -2   2 -16   28.08   15.75
  -3   1 -16  487.28   22.07
  -4   0 -16  444.07   26.94
  -5  -1 -16   33.73   18.09
  -6  -2 -16  335.96   28.25
  -7  -3 -16  595.05   43.06
   2   7 -16  145.06   39.53
   1   6 -16  531.38   32.31
   0   5 -16  581.16   36.91
  -1   4 -16   90.01   20.72
  -2   3 -16  367.60   17.41
  -3   2 -16  900.28   24.36
  -4   1 -16  233.57   19.92
  -5   0 -16   18.33   15.71
  -6  -1 -16  412.57   27.94
  -7  -2 -16  526.31   38.43
   0   6 -16  212.19   31.97
  -1   5 -16  103.21   29.42
  -2   4 -16  667.65   34.79
  -3   3 -16  627.90   27.32
  -4   2 -16   57.87   31.50
  -5   1 -16  192.38   23.63
  -6   0 -16  336.05   30.79
  -7  -1 -16  245.32   28.84
  -2   5 -16  551.54   34.55
  -3   4 -16  188.30   19.83
  -4   3 -16    0.00   24.59
  -5   2 -16  342.49   28.03
  -6   1 -16  197.93   24.54
   4  -2 -17  394.27   31.71
   3  -3 -17  213.59   21.08
   2  -4 -17    0.00   15.66
   1  -5 -17  269.12   18.54
   0  -6 -17  333.19   20.61
   5   0 -17  310.84   24.75
   4  -1 -17  280.85   29.91
   3  -2 -17   30.50   19.87
   2  -3 -17  134.23   15.99
   1  -4 -17  551.90   25.72
   0  -5 -17  247.82   22.28
  -1  -6 -17    0.00   16.61
  -2  -7 -17  351.31   20.30
   5   1 -17  487.82   24.51
   4   0 -17  329.84   25.17
   3  -1 -17    9.44   21.19
   2  -2 -17  380.76   22.11
   1  -3 -17  466.30   23.66
   0  -4 -17    8.50   34.26
  -1  -5 -17  154.39   19.32
  -2  -6 -17  517.26   19.59
  -3  -7 -17  264.46   21.59
   5   2 -17  486.94   25.49
   4   1 -17   71.78   21.76
   3   0 -17  222.60   40.35
   2  -1 -17  453.13   26.24
   1  -2 -17  172.76   17.68
   0  -3 -17   80.75   18.72
  -1  -4 -17  500.09   23.04
  -2  -5 -17  642.61   22.97
  -3  -6 -17  145.47   19.85
  -4  -7 -17  125.65   16.20
   5   3 -17  140.66   27.95
   4   2 -17   47.92   20.62
   3   1 -17  542.35   27.74
   2   0 -17  355.67   23.01
   1  -1 -17    0.00   12.73
   0  -2 -17  338.99   18.87
  -1  -3 -17  987.13   54.07
  -2  -4 -17  430.31   22.96
  -3  -5 -17   34.40   16.15
  -4  -6 -17  321.29   22.29
  -5  -7 -17  395.26   26.52
   5   4 -17   88.32   29.70
   4   3 -17  204.33   25.21
   3   2 -17  566.59   27.09
   2   1 -17  221.59   25.60
   1   0 -17   56.28   15.49
   0  -1 -17  560.41   20.91
  -1  -2 -17  661.32   35.68
  -2  -3 -17   74.96   18.74
  -3  -4 -17  246.64   18.32
  -4  -5 -17  702.92   25.88
  -5  -6 -17  269.21   24.23
   5   5 -17   27.10   32.36
   4   4 -17  366.06   30.33
   3   3 -17  384.67   29.23
   2   2 -17    0.00   41.80
   1   1 -17  281.13   22.23
   0   0 -17  579.78   24.51
  -1  -1 -17  213.03   21.87
  -2  -2 -17  192.34   24.15
  -3  -3 -17  718.17   22.64
  -4  -4 -17  653.68   24.41
  -5  -5 -17   91.03   28.68
  -6  -6 -17   83.34   29.97
   4   5 -17  563.16   35.19
   3   4 -17  163.82   24.17
   2   3 -17   29.70   29.17
   1   2 -17  633.07   37.36
   0   1 -17  346.56   28.17
  -1   0 -17   23.44   23.52
  -2  -1 -17  479.76   44.96
  -3  -2 -17  910.54   28.60
  -4  -3 -17  382.97   25.66
  -5  -4 -17    0.00   24.87
  -6  -5 -17  269.89   29.72
   4   6 -17  669.56   54.67
   3   5 -17   89.02   23.71
   2   4 -17  167.79   28.88
   1   3 -17  603.32   56.06
   0   2 -17  177.88   26.48
  -1   1 -17  171.15   22.10
  -2   0 -17  660.40   35.85
  -3  -1 -17  517.29   26.57
  -4  -2 -17   76.93   19.93
  -5  -3 -17  220.95   25.58
  -6  -4 -17  522.26   36.96
   3   6 -17   54.07   27.78
   2   5 -17  402.43   29.91
   1   4 -17  305.74   33.20
   0   3 -17    9.93   25.36
  -1   2 -17  408.29   26.12
  -2   1 -17  798.67   37.06
  -3   0 -17  291.11   35.00
  -4  -1 -17   29.65   20.83
  -5  -2 -17  604.79   29.72
  -6  -3 -17  489.76   33.66
  -7  -4 -17   23.51   31.35
   2   6 -17  498.38   29.33
   1   5 -17  118.88   29.48
   0   4 -17   59.54   28.13
  -1   3 -17  496.64   25.94
  -2   2 -17  528.58   25.84
  -3   1 -17   38.95   19.26
  -4   0 -17  324.56   24.33
  -5  -1 -17  699.61   25.93
  -6  -2 -17  251.16   29.75
   1   6 -17   24.73   14.40
   0   5 -17  185.33   33.40
  -1   4 -17  477.56   28.17
  -2   3 -17  132.58   15.09
  -3   2 -17  165.69   17.49
  -4   1 -17  792.27   24.60
  -5   0 -17  466.44   22.39
  -6  -1 -17   51.13   25.53
  -1   5 -17  203.35   31.94
  -2   4 -17   31.17   22.14
  -3   3 -17  521.83   27.55
  -4   2 -17  847.58   45.39
  -5   1 -17  182.23   25.88
   4  -1 -18  353.62   23.62
   3  -2 -18  791.98   31.22
   2  -3 -18  350.12   21.82
   1  -4 -18    0.00   19.88
   0  -5 -18  110.86   20.46
  -1  -6 -18  168.91   20.62
   4   0 -18  521.71   31.87
   3  -1 -18  614.02   31.54
   2  -2 -18  127.17   18.91
   1  -3 -18  167.94   19.35
   0  -4 -18  334.37   46.18
  -1  -5 -18  130.54   19.19
  -2  -6 -18   44.85   16.37
   5   2 -18  311.16   44.00
   4   1 -18  737.36   31.53
   3   0 -18  244.18   46.10
   2  -1 -18   65.59   20.52
   1  -2 -18  626.17   23.85
   0  -3 -18  558.27   36.14
  -1  -4 -18   68.04   20.77
  -2  -5 -18   59.29   17.78
  -3  -6 -18  269.14   19.99
   4   2 -18  398.08   28.10
   3   1 -18   25.98   24.60
   2   0 -18  492.08   26.94
   1  -1 -18  763.47   27.06
   0  -2 -18  389.94   31.47
  -1  -3 -18   38.15   40.73
  -2  -4 -18  236.14   20.38
  -3  -5 -18  278.00   19.04
  -4  -6 -18    2.67   14.76
   4   3 -18   62.66   23.38
   3   2 -18  121.87   31.15
   2   1 -18  796.25   31.92
   1   0 -18  573.80   24.27
   0  -1 -18  100.75   20.24
  -1  -2 -18  280.93   29.23
  -2  -3 -18  493.81   21.28
  -3  -4 -18  158.33   17.10
  -4  -5 -18   48.23   21.54
   4   4 -18   29.17   25.85
   3   3 -18  416.88   34.30
   2   2 -18  996.77   44.63
   1   1 -18  357.84   32.86
   0   0 -18   56.33   16.37
  -1  -1 -18  613.38   28.68
  -2  -2 -18  595.14   27.52
  -3  -3 -18    0.00   16.31
  -4  -4 -18  233.31   25.69
  -5  -5 -18  344.76   30.42
   3   4 -18  570.71   33.01
   2   3 -18  590.92   37.61
   1   2 -18  136.28   30.12
   0   1 -18  427.62   29.51
  -1   0 -18  654.94   36.07
  -2  -1 -18  150.25   30.92
  -3  -2 -18   70.99   21.81
  -4  -3 -18  406.58   26.19
  -5  -4 -18  291.09   29.26
   3   5 -18  623.65   34.63
   2   4 -18  172.40   29.77
   1   3 -18  161.66   35.86
   0   2 -18  810.44   38.53
  -1   1 -18  521.83   32.56
  -2   0 -18    0.00   29.45
  -3  -1 -18  271.95   26.46
  -4  -2 -18  500.03   23.83
  -5  -3 -18  136.16   25.87
  -6  -4 -18   31.59   15.13
   2   5 -18    9.36   25.54
   1   4 -18  520.67   39.70
   0   3 -18  928.28   42.66
  -1   2 -18  209.74   26.29
  -2   1 -18   38.51   27.25
  -3   0 -18  448.95   36.51
  -4  -1 -18  326.96   23.38
  -5  -2 -18   33.41   25.38
  -6  -3 -18  373.44   22.35
   1   5 -18  640.77   40.07
   0   4 -18  484.18   55.08
  -1   3 -18   14.67   24.01
  -2   2 -18  303.20   29.14
  -3   1 -18  606.47   27.99
  -4   0 -18   33.64   22.18
  -5  -1 -18  118.47   21.61
  -6  -2 -18  698.44   31.68
  -1   4 -18   46.72   40.33
  -2   3 -18  561.06   25.16
  -3   2 -18  397.13   25.46
  -4   1 -18   18.15   21.84
  -5   0 -18  405.17   23.07
   3  -1 -19  171.16   25.86
   2  -2 -19  561.00   25.39
   1  -3 -19  160.38   27.44
   0  -4 -19   39.07   18.56
  -1  -5 -19  328.83   29.83
   3   0 -19  269.13   46.46
   2  -1 -19  434.42   26.70
   1  -2 -19    0.00   19.58
   0  -3 -19  232.39   30.50
  -1  -4 -19  465.28   27.16
  -2  -5 -19   88.91   17.50
   3   1 -19  450.03   30.87
   2   0 -19  128.45   26.80
   1  -1 -19   66.91   18.51
   0  -2 -19  752.41   34.60
  -1  -3 -19  464.31   47.34
  -2  -4 -19   29.28   19.24
  -3  -5 -19   85.34   19.89
   3   2 -19  524.99   36.84
   2   1 -19   37.89   34.08
   1   0 -19  311.00   20.84
   0  -1 -19  818.56   29.22
  -1  -2 -19  284.55   34.62
  -2  -3 -19   53.98   23.09
  -3  -4 -19  322.45   22.44
  -4  -5 -19  178.06   15.68
   3   3 -19  184.42   29.42
   2   2 -19  103.73   33.08
   1   1 -19  536.26   36.09
   0   0 -19  551.42   33.22
  -1  -1 -19   58.62   30.70
  -2  -2 -19  341.45   35.82
  -3  -3 -19  574.32   28.09
  -4  -4 -19  115.19   23.71
   2   3 -19  275.09   35.03
   1   2 -19  764.43   41.84
   0   1 -19  143.40   29.73
  -1   0 -19  250.97   30.98
  -2  -1 -19  930.34   38.98
  -3  -2 -19  676.66   28.81
  -4  -3 -19   90.61   21.01
   2   4 -19  592.15   32.97
   1   3 -19  500.98   40.78
   0   2 -19   30.33   30.92
  -1   1 -19  524.46   31.13
  -2   0 -19  921.70   32.89
  -3  -1 -19  350.77   26.20
  -4  -2 -19    0.00   21.24
  -5  -3 -19  410.61   26.76
   1   4 -19   61.60   16.57
   0   3 -19  307.15   33.20
  -1   2 -19  764.98   33.57
  -2   1 -19  519.66   28.84
  -4  -1 -19  345.72   27.64
  -5  -2 -19  728.53   34.63
  -1   3 -19  604.10   35.41
  -2   2 -19  113.74   23.51
  -3   1 -19  180.10   26.15
  -4   0 -19  794.68   33.75
   1  -2 -20  532.90   29.12
   0  -3 -20  220.26   17.43
   2   0 -20  456.90   29.68
   1  -1 -20  360.75   27.70
   0  -2 -20   17.70   28.78
  -1  -3 -20  188.83   45.39
   2   1 -20  444.27   32.58
   1   0 -20  236.23   32.07
   0  -1 -20    1.16   25.43
  -1  -2 -20  376.56   33.49
  -2  -3 -20  339.36   26.32
   2   2 -20  507.14   30.43
   1   1 -20   19.69   32.60
   0   0 -20  161.44   26.80
  -1  -1 -20  470.44   35.66
  -2  -2 -20  122.88   30.17
  -3  -3 -20  112.96   22.50
   1   2 -20  113.78   34.72
   0   1 -20  448.51   31.56
  -1   0 -20  330.45   33.25
  -2  -1 -20  102.86   32.28
  -3  -2 -20  280.59   26.94
   0   2 -20  535.61   36.51
  -1   1 -20  138.64   28.66
  -2   0 -20   93.79   26.00
  -3  -1 -20  468.92   30.15
  -1   2 -20   29.59   34.55
  -2   1 -20  293.82   20.59
;
_shelx_hkl_checksum               59463
_olex2_submission_original_sample_id JB3-189
_olex2_submission_special_instructions 'No special instructions were received'
loop_
  _twin_individual_id
  _twin_individual_mass_fraction_refined
 1 1
 2 0
